# Supplementary material for: Proteomic Identification of a Gastric Tumor ECM Signature Associated With Cancer Progression
Source: Front Mol Biosci. 2022 Mar 1;9:818552. doi: 10.3389/fmolb.2022.818552 (PMC8942767; doi:10.3389/fmolb.2022.818552)
Supplement: Supplementary file 9 [file DataSheet1.XLSX]

## Sheet: Proteomics dataset
Proteomics dataset summary with confidently identified proteins																		Normal distant gastric mucosa dECM									Normal adjacent gastric mucosa dECM									Gastric tumor dECM
* Single unique peptide identifications were included only when its amino acid sequence was exclusively related to the identified protein (sequences were queried using the UniProt Blast tool )																		ND1	ND2	ND3	ND4	ND5	ND6	ND7	ND8	ND9	NA1	NA2	NA3	NA4	NA5	NA6	NA7	NA8	NA9	T1	T2	T3	T4	T5	T6	T7	T8	T9
	Division	Category	Description	Gene Symbol	Accession	Sum PEP Score	Coverage [%]	# Peptides	# PSMs	# Unique Peptides	# AAs	MW [kDa]	Score MSPepSearch: MSPepSearch	Score Sequest HT: Sequest HT	# Peptides (by Search Engine): MSPepSearch	# Peptides (by Search Engine): Sequest HT	Modifications	Abundance	Abundance	Abundance	Abundance	Abundance	Abundance	Abundance	Abundance	Abundance	Abundance	Abundance	Abundance	Abundance	Abundance	Abundance	Abundance	Abundance	Abundance	Abundance	Abundance	Abundance	Abundance	Abundance	Abundance	Abundance	Abundance	Abundance
Matrisome	Core matrisome	Collagens	Collagen alpha-1(X) chain OS=Homo sapiens OX=9606 GN=COL10A1 PE=1 SV=2	COL10A1	Q03692	4.317	2	1	2	1*	680	66.1	592		1																139267					396784			115992	453365	6.52005e+06	293503	1.80699e+06	1.61061e+06
	Core matrisome	Collagens	Collagen alpha-1(XI) chain OS=Homo sapiens OX=9606 GN=COL11A1 PE=1 SV=4	COL11A1	P12107	26.524	3	5	87	3	1806	181	45424	12.95	4	1		456932			781036	328014	59629.5	493158	1.5356e+06	465712	94112.7		804968	693196	258238	414319	1.2061e+06			1.49115e+06		468834	9.12807e+06	3.6291e+06	1.57502e+06	668594
	Core matrisome	Collagens	Collagen alpha-1(XII) chain OS=Homo sapiens OX=9606 GN=COL12A1 PE=1 SV=2	COL12A1	Q99715	326.137	18	42	372	42	3063	332.9	134330	9.55	42	1		3.04446e+08	9.25651e+07	4.99427e+07	5.04912e+07	9.20927e+07	3.37884e+07	1.416e+08	2.16414e+08	2.00928e+08	3.03851e+07	9.70327e+07	2.90327e+08	1.41852e+08	2.01465e+08	6.63956e+07	2.57068e+08	2.4235e+08	1.68743e+08	1.91944e+08	1.72891e+08	2.34747e+08	1.39069e+08	1.7557e+08	2.5758e+08	4.96374e+07	9.63269e+07	2.60735e+08
	Core matrisome	Collagens	Collagen alpha-1(XIV) chain OS=Homo sapiens OX=9606 GN=COL14A1 PE=1 SV=3	COL14A1	Q05707	378.517	22	39	569	39	1796	193.4	267481		39			3.5046e+07	5.69624e+07	1.37837e+08	1.27506e+08	1.11781e+08	4.0951e+07	4.34617e+07	5.18777e+07	5.42621e+07	4.51146e+07	1.11225e+08	1.94471e+08	7.8529e+07	1.26933e+08	5.88067e+07	4.96794e+07	7.84029e+07	6.12222e+07	7.34836e+07	4.4573e+07	1.5745e+08	3.23972e+07	1.39865e+08	2.4628e+07	3.61413e+07	4.07601e+07	2.99998e+07
	Core matrisome	Collagens	Collagen alpha-1(XV) chain OS=Homo sapiens OX=9606 GN=COL15A1 PE=1 SV=2	COL15A1	P39059	20.4	4	5	14	5	1388	141.6	4868		5			161147	1.51191e+06		51962.8	124814	1.34404e+06	1.23936e+06	534874	1.67882e+06	254050		578624	493954	976778	2.49438e+06	115705	183930	307495	111921	235405	315678		931251	537643	786211	1.09048e+06	205329
	Core matrisome	Collagens	Collagen alpha-1(XVIII) chain OS=Homo sapiens OX=9606 GN=COL18A1 PE=1 SV=5	COL18A1	P39060	25.615	3	4	22	4	1754	178.1	5109	32.96	3	1		820305	1.56798e+07	1.40476e+07	1.22348e+06	6.4207e+06	1.62405e+06	1.54966e+06		2.48611e+06	3.15291e+06	4.78082e+07	1.61493e+06	3.44581e+06	427287	735960		672001	6.94002e+06		2.02523e+06		3.51961e+06	1.19128e+06		1.20065e+06		305100
	Core matrisome	Collagens	Collagen alpha-1(I) chain OS=Homo sapiens OX=9606 GN=COL1A1 PE=1 SV=5	COL1A1	P02452	756.907	36	67	7340	64	1464	138.9	3553880	445.42	59	17		6.29253e+09	5.51835e+09	6.90621e+09	5.11025e+09	6.3455e+09	4.49803e+08	2.77244e+09	3.09131e+09	3.18331e+09	2.35564e+09	5.14059e+09	7.03901e+09	4.88243e+09	4.34461e+09	1.45821e+09	3.55599e+09	3.02899e+09	3.41662e+09	4.27413e+09	5.59901e+09	6.60521e+09	6.48308e+09	5.11038e+09	2.78218e+09	6.31051e+09	1.83811e+09	2.48501e+09
	Core matrisome	Collagens	Collagen alpha-2(I) chain OS=Homo sapiens OX=9606 GN=COL1A2 PE=1 SV=7	COL1A2	P08123	658.144	25	58	4598	58	1366	129.2	2570799	87.82	55	6		2.81416e+09	6.2405e+09	6.03884e+09	6.37621e+09	7.65142e+09	4.16129e+08	2.49952e+09	6.92949e+09	3.97236e+09	6.50367e+08	2.99763e+09	3.33915e+09	4.81875e+09	3.53529e+09	1.41343e+09	2.91826e+09	4.49924e+09	2.91897e+09	3.24796e+09	5.49815e+09	6.63854e+09	6.09644e+09	4.57501e+09	3.76039e+09	5.48836e+09	4.76037e+09	4.04292e+09
	Core matrisome	Collagens	Collagen alpha-1(XXI) chain OS=Homo sapiens OX=9606 GN=COL21A1 PE=2 SV=1	COL21A1	Q96P44	12.926	2	2	153	2	957	99.3	67081		2			1.49294e+07	6.94181e+06	8.28399e+06	1.79826e+07	9.66448e+06	2.55416e+07	8.03418e+06	2.6247e+07	1.41211e+07	7.37303e+06	1.34891e+07	1.21113e+07	1.36958e+07	1.13662e+07	2.45464e+07	5.84482e+06	1.19112e+07	1.25632e+07	1.41023e+07	8.18999e+06	9.05729e+06	5.43281e+06	9.40702e+06	5.24509e+06	1.0618e+07	1.97052e+07	4.42581e+06
	Core matrisome	Collagens	Collagen alpha-1(XXVIII) chain OS=Homo sapiens OX=9606 GN=COL28A1 PE=2 SV=2	COL28A1	Q2UY09	42.619	6	7	67	7	1125	116.6	30766	2.26	7	1		1.55447e+07	4.5808e+06	6.93479e+06	2.16432e+07	1.00881e+07	1.45149e+06	1.2959e+07	9.18356e+06	6.40923e+06	1.80437e+07	7.23453e+06	1.31438e+06	5.38582e+07	1.01665e+07	7.21669e+06	1.0195e+07	1.17101e+07	5.64882e+06	1.04517e+07	6.27632e+06	2.49386e+06	3.51043e+06	4.88412e+06	2.09589e+06	1.99059e+06	4.8347e+06	6.07536e+06
	Core matrisome	Collagens	Collagen alpha-1(III) chain OS=Homo sapiens OX=9606 GN=COL3A1 PE=1 SV=4	COL3A1	P02461	222.255	13	23	702	22	1466	138.5	384189	163.5	19	7		1.57256e+08	2.03786e+08	2.75935e+08	5.33412e+08	2.37813e+08	7.54779e+07	3.33341e+08	3.58594e+08	2.12734e+08	7.98513e+07	1.85776e+08	5.98054e+08	4.6902e+08	4.6083e+08	3.23547e+08	5.08676e+08	3.17177e+08	2.22862e+08	4.1457e+08	3.26764e+08	6.16342e+08	3.74763e+08	4.72946e+08	3.62955e+08	3.24322e+08	2.34564e+08	2.31795e+08
	Core matrisome	Collagens	Collagen alpha-1(IV) chain OS=Homo sapiens OX=9606 GN=COL4A1 PE=1 SV=4	COL4A1	P02462	377.961	11	25	1216	16	1669	160.5	535093	73.28	24	4		1.02714e+08	6.30337e+08	5.15557e+08	5.41953e+08	2.73741e+08	4.69238e+07	3.28345e+08	3.60571e+08	7.00147e+08	4.56391e+07	5.92621e+08	3.50228e+08	4.3342e+08	2.05113e+08	2.37942e+08	5.51215e+08	2.30498e+08	8.20139e+08	2.53855e+08	5.6431e+08	1.83067e+08	3.77529e+08	2.73112e+08	4.98022e+08	1.9358e+08	1.14321e+09	1.07355e+09
	Core matrisome	Collagens	Collagen alpha-2(IV) chain OS=Homo sapiens OX=9606 GN=COL4A2 PE=1 SV=4	COL4A2	P08572	596.813	19	33	2177	32	1712	167.4	1020778	102.09	31	7		3.62816e+08	9.82809e+08	6.79036e+08	7.6589e+08	4.83415e+08	3.1047e+08	7.0578e+08	5.68616e+08	7.50125e+08	1.78812e+08	1.39274e+09	1.02919e+09	6.87202e+08	4.60923e+08	7.25161e+08	7.60963e+08	5.02863e+08	9.9633e+08	6.69358e+08	8.1538e+08	3.07025e+08	3.10092e+08	7.96664e+08	7.9039e+08	2.94734e+08	1.56852e+09	1.94434e+09
	Core matrisome	Collagens	Collagen alpha-3(IV) chain OS=Homo sapiens OX=9606 GN=COL4A3 PE=1 SV=3	COL4A3	Q01955	42.871	3	5	343	2	1670	161.7	216178	0	5	1		3.32776e+07	1.55828e+08	8.3696e+07	8.13108e+07	3.4077e+07	5.51391e+06	7.02528e+07	8.75879e+07	1.8799e+08	1.0443e+07	1.01564e+08	9.21449e+07	4.86342e+07	2.74749e+07	2.46067e+07	1.71758e+08	1.50525e+07	1.7687e+08	4.00446e+07	1.00826e+08	1.88253e+07	6.70252e+07	5.52946e+07	1.34344e+08	2.44526e+07	1.63915e+08	2.87082e+08
	Core matrisome	Collagens	Collagen alpha-5(IV) chain OS=Homo sapiens OX=9606 GN=COL4A5 PE=1 SV=2	COL4A5	P29400	121.215	5	12	594	2	1685	160.9	262082	2.46	12	1		1.54786e+07	2.71017e+07	1.58961e+07	7.39037e+06	1.04284e+07	409699	5.1381e+06	9.21791e+06	3.54466e+07	165116	1.80988e+07	1.86777e+06	9.83335e+06	1.03201e+07	1.63259e+06	4.89428e+06	1.00059e+07	1.20197e+07	3.74386e+06	3.92617e+06	2.77511e+06	2.78788e+06	350588	433329		2.49384e+06	1.84961e+06
	Core matrisome	Collagens	Collagen alpha-6(IV) chain OS=Homo sapiens OX=9606 GN=COL4A6 PE=1 SV=3	COL4A6	Q14031	41.379	5	6	53	5	1691	163.7	23284		6			2.49289e+07	1.66277e+07	3.37644e+06	1.09692e+07	6.25856e+06	5.11553e+06	5.9791e+06	1.98981e+07	2.53573e+07	553356	4.83369e+06	683443	2.28431e+06	2.36924e+06	3.63746e+06	1.69625e+07	1.07602e+06	7.47642e+06	633314	2.96083e+06	1.22168e+06	930384	113471	666921	378656	1.79768e+06	7.5759e+06
	Core matrisome	Collagens	Collagen alpha-1(V) chain OS=Homo sapiens OX=9606 GN=COL5A1 PE=1 SV=3	COL5A1	P20908	177.643	7	14	613	12	1838	183.4	282810	3.14	13	1		1.92449e+08	6.7662e+07	5.22248e+07	1.93319e+08	7.13607e+07	1.34933e+07	6.6151e+07	1.11259e+08	7.48474e+07	3.68501e+07	4.75169e+07	1.49231e+08	1.12003e+08	9.17401e+07	4.1408e+07	7.7068e+07	7.73011e+07	7.90889e+07	6.43987e+07	7.26305e+07	1.02504e+08	8.74022e+07	1.4392e+08	5.7764e+07	6.89123e+07	1.02928e+08	1.69985e+08
	Core matrisome	Collagens	Collagen alpha-2(V) chain OS=Homo sapiens OX=9606 GN=COL5A2 PE=1 SV=3	COL5A2	P05997	108.778	13	11	488	11	1499	144.8	192096	244.74	9	4		1.17357e+08	2.87565e+07	2.70176e+07	9.99124e+07	5.93014e+07	1.31622e+07	5.97162e+07	4.34951e+07	6.04187e+07	4.97472e+07	4.39502e+07	1.23151e+08	4.49949e+07	5.61563e+07	2.24821e+07	6.46056e+07	2.47889e+07	4.82445e+07	8.62864e+07	8.90992e+07	5.86441e+07	1.73e+08	4.45149e+07	5.41694e+07	5.25535e+07	6.14068e+07	7.35812e+07
	Core matrisome	Collagens	Collagen alpha-1(VI) chain OS=Homo sapiens OX=9606 GN=COL6A1 PE=1 SV=3	COL6A1	P12109	1036.01	60	87	4510	87	1028	108.5	2571754	113.4	81	10		1.0517e+09	1.30188e+09	1.10589e+09	1.38344e+09	1.04898e+09	1.03722e+09	1.65912e+09	1.4103e+09	1.5583e+09	8.45214e+08	1.06066e+09	7.68708e+08	1.30073e+09	1.44459e+09	1.39601e+09	1.60719e+09	1.42997e+09	1.35482e+09	1.62078e+09	1.40739e+09	9.68702e+08	9.23625e+08	1.35716e+09	1.42681e+09	3.81356e+08	6.96176e+08	1.30584e+09
	Core matrisome	Collagens	Collagen alpha-2(VI) chain OS=Homo sapiens OX=9606 GN=COL6A2 PE=1 SV=4	COL6A2	P12110	692.232	36	55	4517	55	1019	108.5	2756417	4.8	54	2		6.67851e+08	1.03209e+09	1.0744e+09	1.06785e+09	1.03112e+09	6.20125e+08	1.2798e+09	8.96018e+08	1.40603e+09	1.39144e+09	1.44492e+09	9.60827e+08	1.06327e+09	1.26504e+09	1.31188e+09	9.1282e+08	2.22872e+09	1.70808e+09	1.40001e+09	1.28623e+09	8.58685e+08	8.91127e+08	1.49923e+09	1.12196e+09	7.81755e+08	8.65301e+08	9.15765e+08
	Core matrisome	Collagens	Collagen alpha-3(VI) chain OS=Homo sapiens OX=9606 GN=COL6A3 PE=1 SV=5	COL6A3	P12111	2278.29	44	191	9671	191	3177	343.5	5326808	49.95	189	10		8.90673e+08	1.22153e+09	1.17627e+09	1.96931e+09	1.00325e+09	2.53832e+09	2.97855e+09	7.58569e+08	1.23164e+09	3.2729e+09	1.68165e+09	6.99783e+08	1.97235e+09	2.94316e+09	3.86832e+09	1.52027e+09	2.45554e+09	1.333e+09	1.95762e+09	1.77486e+09	1.03902e+09	6.86715e+08	1.66977e+09	1.94827e+09	4.9114e+08	6.77358e+08	9.47821e+08
	Core matrisome	Collagens	Collagen alpha-5(VI) chain OS=Homo sapiens OX=9606 GN=COL6A5 PE=1 SV=1	COL6A5	A8TX70	7.385	1	3	13	3	2615	289.7		27.85		3		5.68985e+06	1.15447e+06	187998	909523	403803	373614	602680	2.32188e+06	6.51481e+06		2.45207e+06		1.55515e+06	1.24892e+06	421284	2.84277e+06	705999	3.45157e+06	315991	1.15003e+06				268858	75789.4	59104.2	389478
	Core matrisome	Collagens	Collagen alpha-1(VII) chain OS=Homo sapiens OX=9606 GN=COL7A1 PE=1 SV=2	COL7A1	Q02388	42.527	4	9	16	9	2944	295	8328		9				606337	2.71313e+06		467545	188044	3.57779e+06		772315	56044.2	642646	255440	862548	518667	64060.2			708625	4.8246e+06	494704		3.19903e+06	240827	1.52701e+07	1.17357e+06	390955	3.53486e+06
	Core matrisome	Collagens	Collagen alpha-1(VIII) chain OS=Homo sapiens OX=9606 GN=COL8A1 PE=1 SV=2	COL8A1	P27658	13.299	5	3	47	3	744	73.3	29138		3			3.05465e+06		848157	1.90522e+06	1.22104e+06	5.19363e+06		1.6567e+06	1.70457e+06	689464	1.75627e+06	390472	2.65013e+06	1.39694e+06	3.22241e+06	162538	6.13574e+06	2.64066e+06	2.65217e+06	5.49885e+06	1.76849e+06	572728	4.46705e+06	2.41441e+06	790895	3.92371e+06	1.99484e+06
	Core matrisome	ECM Glycoproteins	Target of Nesh-SH3 OS=Homo sapiens OX=9606 GN=ABI3BP PE=1 SV=1	ABI3BP	Q7Z7G0	24.001	7	7	16	7	1075	118.6	5689		7				2.43294e+06		52674.2	94330.1	3.33398e+06	70216.2						267994	377607	7.65689e+06								80388	57833.9		563035
	Core matrisome	ECM Glycoproteins	BMP-binding endothelial regulator protein OS=Homo sapiens OX=9606 GN=BMPER PE=1 SV=3	BMPER	Q8N8U9	3.799	3	2	3	2	685	75.9		7.9		2		592644	944020		986253	145835	53149.6	661740	1.76909e+06	631171	59402.5				198233			1.34223e+06	1.10809e+06	1.10809e+06					96114	287811	775047
	Core matrisome	ECM Glycoproteins	Cartilage intermediate layer protein 1 OS=Homo sapiens OX=9606 GN=CILP PE=1 SV=4	CILP	O75339	12.649	3	3	12	3	1184	132.5	5103	3.29	2	1		2.10097e+06		1.52239e+06	3.1326e+06	8.90506e+06	1.73732e+06	653549		118385	323534	428640		285615		1.05493e+06	386930	2.22202e+06	313190	313190	1.26198e+07	609257	546529	108826	574127	590837		419726
	Core matrisome	ECM Glycoproteins	Deleted in malignant brain tumors 1 protein OS=Homo sapiens OX=9606 GN=DMBT1 PE=1 SV=2	DMBT1	Q9UGM3	21.677	11	2	18	2	2413	260.6	8968		2				129910	600317	570457	1.82172e+06	1.63948e+06	8.15404e+06	1.85056e+06	437133	2.78473e+06	713987	253848	1.55678e+06	523730	4.44484e+06	1.27883e+07	769221	1.61243e+06	1.61243e+06	121937	907572		369238	766408	1.79951e+07	155887
	Core matrisome	ECM Glycoproteins	Dermatopontin OS=Homo sapiens OX=9606 GN=DPT PE=1 SV=2	DPT	Q07507	188.665	61	15	1322	15	201	24	559464	392.49	13	3		4.00455e+08	2.42838e+08	1.32149e+08	2.24058e+08	2.51689e+08	8.35492e+07	2.17021e+08	2.61908e+08	3.7315e+08	1.63748e+08	1.89424e+08	4.64613e+08	3.62661e+08	2.03261e+08	7.04018e+07	2.76619e+08	1.36339e+08	3.82218e+08	3.82218e+08	1.9823e+08	3.06003e+08	1.01013e+08	2.04241e+08	1.3051e+08	1.64652e+08	2.68769e+08	4.24968e+08
	Core matrisome	ECM Glycoproteins	EGF-containing fibulin-like extracellular matrix protein 1 OS=Homo sapiens OX=9606 GN=EFEMP1 PE=1 SV=2	EFEMP1	Q12805	234.124	52	21	499	21	493	54.6	210675	0	21	1		8.95297e+08	2.27399e+07	3.66291e+07	1.41577e+07	3.45568e+07	1.18199e+07	5.34456e+07	1.1149e+07	5.23612e+07	3.02621e+07	1.16502e+08	4.76712e+07	3.92102e+07	7.1703e+07	8.544e+06	9.01078e+07	3.51942e+07	1.55907e+08	1.55907e+08	8.37909e+07	5.89373e+07	1.17171e+09	1.18404e+08	9.43654e+07	1.38405e+07	8.84883e+07	5.79743e+07
	Core matrisome	ECM Glycoproteins	EGF-containing fibulin-like extracellular matrix protein 2 OS=Homo sapiens OX=9606 GN=EFEMP2 PE=1 SV=3	EFEMP2	O95967	17.403	9	3	8	3	443	49.4	3211		3			159863							786397				579709		430146		314872	1.01375e+06	5.87073e+06	5.87073e+06	836480	180269	1.74603e+06	2.59912e+06	3.42044e+06	1.06043e+06	5.82998e+06	179416
	Core matrisome	ECM Glycoproteins	Elastin OS=Homo sapiens OX=9606 GN=ELN PE=1 SV=4	ELN	P15502	347.255	40	20	1079	20	786	68.4	451104	1228.65	14	9		4.84711e+08	1.19983e+08	7.86166e+07	3.1259e+08	1.00443e+08	1.30843e+08	9.29904e+07	2.74243e+08	1.97768e+08	2.84818e+08	2.26519e+08	2.57815e+07	3.49515e+08	1.87579e+08	3.7857e+08	1.15706e+08	4.19052e+08	5.1144e+08	5.1144e+08	1.34924e+08	4.6592e+07	1.47824e+08	1.01237e+08	6.8808e+07	5.37768e+07	1.62145e+08	9.09437e+07
	Core matrisome	ECM Glycoproteins	EMILIN-1 OS=Homo sapiens OX=9606 GN=EMILIN1 PE=1 SV=3	EMILIN1	Q9Y6C2	380.078	42	37	1154	37	1016	106.6	563642	4.04	36	1		1.20252e+08	5.875e+07	8.54465e+07	1.2506e+08	1.56407e+08	1.62295e+08	2.35991e+08	1.60337e+08	6.08112e+07	2.87248e+08	2.2804e+08	1.93421e+08	2.35735e+08	3.78633e+08	2.42601e+08	1.01086e+08	2.43006e+08	9.51518e+07	9.51518e+07	9.42506e+07	1.21462e+08	1.16294e+08	4.01681e+08	1.02589e+08	1.85226e+07	1.42797e+08	6.30968e+07
	Core matrisome	ECM Glycoproteins	EMILIN-2 OS=Homo sapiens OX=9606 GN=EMILIN2 PE=1 SV=3	EMILIN2	Q9BXX0	14.452	2	2	7	2	1053	115.6	2046		2				246829	201414	81983.4	290668	2.25543e+06	1.66843e+06				670327	133559		340219	9.67998e+06					124334	197826		830148	1.39157e+06
	Core matrisome	ECM Glycoproteins	EMILIN-3 OS=Homo sapiens OX=9606 GN=EMILIN3 PE=1 SV=2	EMILIN3	Q9NT22	5.778	4	2	14	2	766	82.6	5349	3.73	1	1		4.46242e+06	927158	208116	1.35766e+06	2.77234e+06	1.44489e+06	848591	1.54214e+06	4.70325e+06	3.08513e+06	746393	898737	503970	1.22271e+06	151295	262087	9.89434e+06	3.19305e+06	3.19305e+06	774416	870610	1.22949e+06	447671	3.17123e+06	1.84716e+06	5.77705e+06	1.93326e+06
	Core matrisome	ECM Glycoproteins	Fibulin-1 OS=Homo sapiens OX=9606 GN=FBLN1 PE=1 SV=4	FBLN1	P23142	99.675	23	12	65	12	703	77.2	30414		12				1.21664e+06	551755	1.0739e+06	1.07476e+06	2.50742e+06	4.10116e+06	1.58565e+06	2.01929e+06	7.38391e+06	5.17414e+06	2.80823e+06	1.50212e+06	2.05625e+06	1.37378e+06	3.01746e+06	981623	1.85876e+06	1.85876e+06	5.86373e+06	151609	8.60061e+06	2.59228e+07	3.85059e+07	7.45858e+06	6.6659e+06	3.64576e+06
	Core matrisome	ECM Glycoproteins	Fibulin-2 OS=Homo sapiens OX=9606 GN=FBLN2 PE=1 SV=2	FBLN2	P98095	72.898	9	9	45	9	1184	126.5	16548	0	9	1		3.07494e+06	1.81819e+06	5.90434e+06	1.80594e+06	956947	584361	702424	1.71076e+06	5.20318e+06	1.86554e+06	2.30261e+06	296454	1.94715e+06	3.45295e+06	2.02159e+06	1.49958e+06	4.04209e+06	2.53545e+06	2.53545e+06	1.22652e+06	594722	1.66124e+07	1.19804e+07	7.56266e+06	112105	4.98936e+06	534837
	Core matrisome	ECM Glycoproteins	Fibulin-5 OS=Homo sapiens OX=9606 GN=FBLN5 PE=1 SV=1	FBLN5	Q9UBX5	146.192	34	18	134	18	448	50.1	61064		18			8.30537e+06	3.82994e+06	4.73076e+06	6.54383e+06	7.61252e+06	1.75515e+07	2.53747e+07	2.10765e+06	1.33726e+07	3.88632e+06	2.35131e+07	1.09235e+07	1.22219e+07	1.52387e+07	7.97447e+06	1.97716e+07	1.07643e+07	3.23461e+07	3.23461e+07	2.06251e+07	2.4517e+07	4.9645e+06	4.14501e+07	4.34243e+07	3.53994e+06	1.16425e+07	1.09128e+07
	Core matrisome	ECM Glycoproteins	Fibrillin-1 OS=Homo sapiens OX=9606 GN=FBN1 PE=1 SV=4	FBN1	P35555	2035.38	53	162	10915	153	2871	312.1	5642720	348.75	155	21		3.9221e+08	1.64136e+09	1.92201e+09	9.71331e+08	1.59099e+09	2.13591e+08	2.43873e+09	5.23712e+08	1.97085e+09	2.0091e+09	2.46167e+09	1.75005e+09	1.36264e+09	2.80176e+09	3.89992e+08	2.74917e+09	1.49849e+09	2.91154e+09	2.91154e+09	1.99392e+09	1.36991e+09	2.21679e+09	4.50863e+09	2.61044e+09	2.26931e+08	1.91414e+09	1.19796e+09
	Core matrisome	ECM Glycoproteins	Fibrillin-2 OS=Homo sapiens OX=9606 GN=FBN2 PE=1 SV=3	FBN2	P35556	336.285	17	44	1168	35	2912	314.6	652992	73.55	40	8		3.7748e+07	3.56913e+07	2.25067e+07	1.97706e+07	3.85985e+07	4.11341e+06	4.68407e+07	3.1203e+07	6.06216e+07	1.80964e+07	7.50938e+07	2.35315e+07	5.10314e+07	6.54318e+07	7.2893e+06	1.37372e+08	9.36522e+07	9.12932e+07	9.12932e+07	7.30009e+07	2.05652e+07	2.48971e+07	8.44125e+07	8.10115e+07	2.73594e+07	8.75407e+07	7.4728e+07
	Core matrisome	ECM Glycoproteins	Fibrinogen alpha chain OS=Homo sapiens OX=9606 GN=FGA PE=1 SV=2	FGA	P02671	173.316	25	18	214	18	866	94.9	95596		18			8.61639e+06	5.82777e+06	1.54504e+07	2.58165e+07	2.93926e+06	4.72536e+07	5.22486e+07	5.26679e+06	4.53015e+06	2.88252e+07	1.66625e+07	8.1615e+06	2.52471e+07	3.06523e+07	1.17844e+08	3.63559e+07	2.45439e+07	1.73912e+07	1.73912e+07	5.11739e+06	5.18903e+06	6.75212e+06	1.65242e+07	7.82492e+07	8.69184e+06	2.05796e+07	4.43004e+07
	Core matrisome	ECM Glycoproteins	Fibrinogen beta chain OS=Homo sapiens OX=9606 GN=FGB PE=1 SV=2	FGB	P02675	206.46	34	22	280	22	491	55.9	128154		22			2.28052e+07	4.69941e+07	4.37705e+07	2.60838e+07	1.71602e+07	2.41307e+07	5.8851e+07	2.11039e+07	1.50938e+07	6.10133e+07	4.82517e+07	3.79925e+07	4.77311e+07	5.51505e+07	1.04409e+08	5.06031e+07	4.87491e+07	2.37132e+07	2.37132e+07	2.06496e+07	2.23534e+08	1.28756e+07	7.09019e+07	1.78476e+08	5.51505e+06	3.3348e+08	8.68235e+07
	Core matrisome	ECM Glycoproteins	Fibrinogen gamma chain OS=Homo sapiens OX=9606 GN=FGG PE=1 SV=3	FGG	P02679	207.843	41	24	263	23	453	51.5	125057		24			1.59839e+07	2.06041e+07	2.75023e+07	3.62749e+07	1.77714e+07	1.46918e+07	4.93358e+07	7.0999e+06	2.25839e+07	3.95253e+07	4.2955e+07	1.32395e+07	4.44593e+07	5.49663e+07	4.51814e+07	1.52089e+07	2.52873e+07	2.82646e+07	2.82646e+07	1.76802e+07	1.34364e+07	1.62011e+07	2.48475e+07	1.13342e+08	6.59578e+06	3.87482e+07	4.43754e+07
	Core matrisome	ECM Glycoproteins	Fibronectin OS=Homo sapiens OX=9606 GN=FN1 PE=1 SV=5	FN	P02751	622.784	35	70	610	70	2477	272.2	292077	5.55	69	2		5.88994e+07	4.36922e+07	2.266e+07	6.39555e+07	3.83183e+07	1.66085e+08	9.8473e+07	5.41363e+07	2.81528e+07	4.3819e+08	2.56478e+07	2.96294e+07	2.79844e+07	5.43893e+07	1.2287e+08	2.86196e+07	2.72849e+07	3.07623e+07	3.07623e+07	3.86341e+07	6.19189e+07	8.15879e+07	8.05535e+07	4.96294e+08	2.37741e+07	5.85086e+07	3.16024e+07
	Core matrisome	ECM Glycoproteins	Insulin-like growth factor-binding protein 7 OS=Homo sapiens OX=9606 GN=IGFBP7 PE=1 SV=1	IGFBP7	Q16270	22.149	18	3	8	3	282	29.1	3893		3			1.14972e+06		445518	973698	446533	83403						1.27342e+06								2.05843e+06		1.82619e+06	839125	6.44846e+06	1.83058e+06	3.47504e+06	5.99812e+06
	Core matrisome	ECM Glycoproteins	Lactadherin OS=Homo sapiens OX=9606 GN=MFGE8 PE=1 SV=3	MFGE8	Q08431	11.3	6	2	9	2	387	43.1	2757		2			206813	990518	1.34999e+06	2.74977e+06	652988	742893	4.83352e+06		398250		1.93836e+06		438232		1.17367e+06	4.3877e+06	2.45265e+06	719612	1.00345e+06	544771		933792	506626	1.50805e+07	2.00541e+06	2.82394e+06	1.18641e+07
	Core matrisome	ECM Glycoproteins	Laminin subunit alpha-2 OS=Homo sapiens OX=9606 GN=LAMA2 PE=1 SV=4	LAMA2	P24043	95.711	6	16	28	16	3122	343.7	10958		16			2.11235e+07	1.17349e+06	4.71875e+06	345179	3.73283e+06	443274	1.22207e+06	1.57676e+06	7.78951e+06	2.05295e+06	3.82889e+06	4.05798e+07	2.58881e+06	4.39951e+06	229243	2.29684e+06	899498	658368	719612	2.32372e+06	5.37318e+06	9.52125e+06	5.11899e+06	94325.7	1.37479e+06	1.30427e+06	3.12117e+06
	Core matrisome	ECM Glycoproteins	Laminin subunit alpha-3 OS=Homo sapiens OX=9606 GN=LAMA3 PE=1 SV=2	LAMA3	Q16787	37.045	4	9	21	8	3333	366.4	6230	15.07	5	4		4.09928e+06	4.51854e+06	2.29458e+06	2.75172e+06	1.61363e+06	2.65248e+07	1.27407e+07	1.61045e+06	5.4309e+06	2.48213e+06	2.24779e+06	903832	2.44514e+06	3.37765e+06	2.7154e+07	6.44258e+06	2.22363e+07	3.5892e+07	658368	2.03701e+06	255880	484427	477057	3.15911e+06	6.11841e+06	7.52212e+07	6.34063e+07
	Core matrisome	ECM Glycoproteins	Laminin subunit alpha-4 OS=Homo sapiens OX=9606 GN=LAMA4 PE=1 SV=4	LAMA4	Q16363	137.794	12	21	132	21	1823	202.4	56453	0	20	1		3.16821e+07	1.26876e+07	9.33996e+06	8.24754e+06	1.55612e+07	6.25413e+08	4.65341e+08	2.27071e+08	2.18053e+08	1.28859e+07	4.18501e+07	2.7842e+07	3.66268e+07	6.83555e+07	8.99519e+08	2.14303e+08	3.57927e+08	2.44571e+08	3.5892e+07	2.66525e+07	8.34754e+06	1.23145e+07	3.16595e+07	2.19516e+08	1.99035e+08	1.87879e+08	1.7312e+08
	Core matrisome	ECM Glycoproteins	Laminin subunit alpha-5 OS=Homo sapiens OX=9606 GN=LAMA5 PE=1 SV=8	LAMA5	O15230	932.751	33	96	1867	95	3695	399.5	942275	53.97	90	9		3.34046e+08	2.19548e+08	3.52029e+08	4.19777e+08	4.88655e+08	5.8529e+07	6.7725e+07	2.39218e+07	2.85529e+07	1.99665e+08	2.6406e+08	1.9019e+08	4.93851e+08	3.49346e+08	5.43841e+07	7.19638e+07	4.20549e+07	2.92553e+07	2.44571e+08	2.96318e+08	2.48757e+08	1.84894e+08	3.28097e+08	6.98851e+07	1.12363e+07	3.94565e+07	9.61433e+07
	Core matrisome	ECM Glycoproteins	Laminin subunit beta-1 OS=Homo sapiens OX=9606 GN=LAMB1 PE=1 SV=2	LAMB1	P07942	402.599	30	42	368	42	1786	197.9	173358	14.6	42	4		2.56696e+07	2.63162e+07	3.41612e+07	2.9168e+07	6.24945e+07	8.89683e+08	4.09048e+08	2.39357e+08	1.5775e+08	3.94e+07	5.25133e+07	1.75902e+08	3.0387e+07	6.45003e+07	1.33661e+09	2.05437e+08	4.01558e+08	1.19495e+08	2.92553e+07	8.45525e+07	3.75037e+07	1.94914e+07	4.90312e+07	1.47503e+08	8.48373e+07	1.35534e+08	4.4697e+07
	Core matrisome	ECM Glycoproteins	Laminin subunit beta-2 OS=Homo sapiens OX=9606 GN=LAMB2 PE=1 SV=2	LAMB2	P55268	674.448	43	63	1283	63	1798	195.9	644253	11.41	62	2		1.33781e+08	1.70498e+08	1.78143e+08	1.68446e+08	1.65524e+08	481183	7.60535e+06	1.32995e+07	3.38763e+07	2.30795e+08	1.53026e+08	2.54742e+08	2.56538e+08	4.26419e+08	4.27066e+06	2.85653e+06	3.65875e+07	7.39101e+07	1.19495e+08	1.3337e+08	1.6916e+08	7.98864e+07	2.51875e+08	4.86437e+06	2.20858e+07	2.77773e+07	3.97354e+07
	Core matrisome	ECM Glycoproteins	Laminin subunit beta-3 OS=Homo sapiens OX=9606 GN=LAMB3 PE=1 SV=1	LAMB3	Q13751	70.069	11	10	54	10	1172	129.5	22266	5.75	9	2		9.42113e+06	2.87744e+06	2.79317e+07	1.04994e+07	5.26637e+06	6.15651e+08	4.49081e+08	1.31937e+08	2.16058e+08	5.15594e+06	8.69554e+07	1.24974e+07	2.70131e+07	4.42749e+07	7.58854e+08	3.21235e+08	4.3876e+08	1.85663e+08	7.39101e+07	3.61364e+07	1.17238e+07	4.77365e+07	6.21855e+07	1.36042e+08	8.91279e+07	1.95149e+08	1.48011e+08
	Core matrisome	ECM Glycoproteins	Laminin subunit gamma-1 OS=Homo sapiens OX=9606 GN=LAMC1 PE=1 SV=3	LAMC1	P11047	803.551	57	77	1590	77	1609	177.5	763493	23.31	75	5		2.89953e+08	2.35646e+08	3.29602e+08	3.01793e+08	3.23071e+08	15359.1	3.72179e+06	2.10257e+07	2.89211e+07	1.82233e+08	3.27001e+08	6.13631e+08	3.47983e+08	4.18533e+08	703420	4.40137e+06	1.13944e+07	1.98662e+07	1.85663e+08	2.11208e+08	3.43041e+08	1.71432e+08	3.65099e+08	2.87621e+06	1.19992e+07	2.97623e+07	2.12582e+07
	Core matrisome	ECM Glycoproteins	Laminin subunit gamma-2 OS=Homo sapiens OX=9606 GN=LAMC2 PE=1 SV=2	LAMC2	Q13753	30.513	5	4	32	4	1193	130.9	11893		4			4.42897e+06	88535.2	850464	965250	1.66477e+06					1.41825e+06		1.56418e+06	680546	2.09224e+06					1.98662e+07	6.76923e+06	874776	6.56395e+06	2.45715e+06
	Core matrisome	ECM Glycoproteins	Leucine-rich repeat LGI family member 4 OS=Homo sapiens OX=9606 GN=LGI4 PE=1 SV=1	LGI4	Q8N135	9.694	7	2	3	2	537	59.1		8.91		2					89744		2.74238e+06	3.12107e+07	1.39942e+07	3.71674e+07				227787		3.30901e+07	4.75416e+07	1.65927e+07	8.41727e+07				71422.4		6.60878e+07	3.63092e+06	7.87895e+07	5.71748e+07
	Core matrisome	ECM Glycoproteins	Latent-transforming growth factor beta-binding protein 1 OS=Homo sapiens OX=9606 GN=LTBP1 PE=1 SV=4	LTBP1	Q14766	180.127	13	20	351	19	1721	186.7	169141	4.18	19	1		3.35192e+07	1.83712e+07	2.76399e+07	2.10941e+07	2.35862e+07	887274	131702	139364	728666	3.86598e+07	9.34581e+07	2.02712e+07	2.60783e+07	4.03631e+07	222076		146690	1.0085e+06	8.41727e+07	5.82245e+07	1.53793e+07	7.65308e+07	1.07806e+08	5.8196e+06		1.83992e+06
	Core matrisome	ECM Glycoproteins	Latent-transforming growth factor beta-binding protein 2 OS=Homo sapiens OX=9606 GN=LTBP2 PE=1 SV=3	LTBP2	Q14767	12.719	3	4	21	4	1821	194.9	9882		4				517411		737315	474545	242288	897582	1.42956e+06	578689		1.32618e+06		276361						1.0085e+06	3.17471e+06	359230	1.34557e+06	2.37162e+06	2.17197e+06		1.40592e+06
	Core matrisome	ECM Glycoproteins	Latent-transforming growth factor beta-binding protein 3 OS=Homo sapiens OX=9606 GN=LTBP3 PE=1 SV=4	LTBP3	Q9NS15	24.57	4	4	24	3	1303	139.3	9736	3.15	3	1					161806	270933	1.93044e+06	8.96082e+06	1.51843e+06	2.58832e+06	331443					1.74533e+06	2.80005e+06	2.43578e+06	1.06242e+07				1.31266e+06		4.3805e+06	5.94437e+06	5.35172e+06	2.37161e+06
	Core matrisome	ECM Glycoproteins	Latent-transforming growth factor beta-binding protein 4 OS=Homo sapiens OX=9606 GN=LTBP4 PE=1 SV=2	LTBP4	Q8N2S1	57.922	9	12	29	12	1624	173.3	10551	4.66	11	2		1.10062e+07	487724	2.08433e+06	846896	945106	4.14458e+06	1.81077e+06	477562	1.07819e+06	519443	5.57314e+06	2.00444e+06	74812.8	5.18066e+06	1.73812e+06	1.73489e+06	265218	50430.5	1.06242e+07	3.05521e+06	1.88082e+06	1.48329e+06	8.2578e+06	513219	1.46071e+06		116270
	Core matrisome	ECM Glycoproteins	Matrilin-2 OS=Homo sapiens OX=9606 GN=MATN2 PE=1 SV=4	MATN2	O00339	22.116	3	2	8	2	956	106.8	4418		2							1.45699e+06	3.24582e+06	1.34941e+07	2.20291e+06	2.08519e+07	963351	4.8719e+06	2.00361e+06	540318	845292	5.06731e+06	4.16287e+07	9.06777e+06	2.57057e+07	50430.5	3.2323e+06	2.06489e+06	2.58559e+06	2.06213e+06	6.9252e+07	3.76935e+06	1.46082e+07	1.06761e+07
	Core matrisome	ECM Glycoproteins	Microfibrillar-associated protein 2 OS=Homo sapiens OX=9606 GN=MFAP2 PE=1 SV=1	MFAP2	P55001	55.044	16	3	84	3	183	20.8	48892	8.5	3	1		1.96836e+06	9.85038e+06	1.14405e+07	7.00159e+06	8.08719e+06	324356	2.56792e+06	1.13943e+06	5.95302e+06	8.75793e+06	2.97868e+07	1.87152e+07	6.12313e+06	1.81999e+07	1.09055e+06	2.38123e+06	469895	6.81342e+06	2.57057e+07	1.68647e+07	2.00339e+07	4.40334e+07	1.29629e+08	6.28099e+06	1.27133e+06	3.25563e+06	7.05289e+06
	Core matrisome	ECM Glycoproteins	Microfibril-associated glycoprotein 4 OS=Homo sapiens OX=9606 GN=MFAP4 PE=1 SV=2	MFAP4	P55083	44.027	24	8	95	7	255	28.6	51006		8			1.69242e+06	4.39405e+06	4.80929e+06	2.36839e+06	5.02584e+06	464537	1.67554e+07	4.43838e+06	3.20735e+06	5.62377e+06	1.34781e+07	785724	7.35486e+06	5.43362e+06	4.39609e+06	7.67594e+06	5.47776e+06	5.80029e+06	6.81342e+06	1.0371e+07	1.42106e+06	1.95079e+06	4.777e+06	1.72921e+06	1.16866e+06	7.90439e+06	6.44773e+06
	Core matrisome	ECM Glycoproteins	Microfibrillar-associated protein 5 OS=Homo sapiens OX=9606 GN=MFAP5 PE=1 SV=1	MFAP5	Q13361	70.203	32	7	147	7	173	19.6	70278		7			1.2376e+07	1.21508e+07	1.59302e+07	6.97771e+06	1.39566e+07	161531	362285	4.22014e+06	1.66237e+06	6.09281e+07	3.83422e+07	1.01634e+07	1.68012e+07	2.59532e+07	472905		943914	1.00345e+06	5.80029e+06	6.99329e+06	1.96345e+07	4.40715e+06	9.09734e+06	295199	704145	684650
	Core matrisome	ECM Glycoproteins	Nidogen-1 OS=Homo sapiens OX=9606 GN=NID1 PE=1 SV=3	NID1	P14543	368.44	36	41	723	40	1247	136.3	367687	26.97	39	2		5.73098e+07	4.54477e+07	8.10293e+07	1.00593e+08	9.57273e+07	3.12368e+08	2.51333e+08	1.27758e+08	1.40208e+08	1.19593e+08	7.23226e+07	2.87078e+08	8.15147e+07	1.13637e+08	4.15927e+08	1.80329e+08	9.44632e+07	1.63696e+08	1.63696e+08	5.68331e+07	6.13642e+07	2.12515e+07	1.22247e+08	2.88569e+07	2.56958e+07	6.34915e+07	6.99956e+07
	Core matrisome	ECM Glycoproteins	Nidogen-2 OS=Homo sapiens OX=9606 GN=NID2 PE=1 SV=3	NID2	Q14112	139.951	17	18	95	17	1375	151.2	44842	0	18	1		1.18322e+07	2.76204e+06	5.28691e+06	8.4089e+06	5.09436e+06	2.31048e+07	2.15533e+07	1.72542e+06	5.60506e+06	1.39433e+07	1.13017e+07	3.85512e+07	4.0214e+07	2.17481e+07	3.04626e+07	9.32794e+06	9.60244e+06	3.20403e+06	3.20403e+06	1.55811e+07	4.74275e+06	4.88998e+06	2.59824e+07	3.89881e+06	2.47733e+06	1.59143e+07	2.77185e+07
	Core matrisome	ECM Glycoproteins	Nephronectin OS=Homo sapiens OX=9606 GN=NPNT PE=2 SV=3	NPNT	Q6UXI9	111.808	26	12	443	12	565	61.9	191635	21.81	11	2		3.68524e+08	7.17774e+07	5.82569e+07	8.9358e+07	4.18853e+07	8.25286e+06	6.17318e+07	6.73984e+07	7.24373e+07	4.17891e+07	4.89348e+07	5.99564e+06	5.34288e+07	3.59741e+07	6.49512e+06	7.53337e+07	1.39803e+08	4.57549e+07	4.57549e+07	4.04986e+07	1.21437e+07	4.40817e+07	7.44982e+06	2.17947e+07	1.84229e+06	1.12021e+08	2.04428e+07
	Core matrisome	ECM Glycoproteins	Periostin OS=Homo sapiens OX=9606 GN=POSTN PE=1 SV=2	POSTN	Q15063	512.957	46	37	743	37	836	93.3	394558		37			1.86547e+07	3.35322e+07	6.09126e+07	8.04704e+07	8.52529e+07	6.00409e+07	2.92875e+08	2.00847e+07	3.96544e+07	1.03181e+08	5.45955e+07	3.77632e+07	8.56289e+07	3.58212e+08	7.23943e+07	2.02009e+08	1.11737e+08	4.42999e+07	4.42999e+07	1.50189e+08	1.25209e+08	3.90303e+07	8.73957e+07	1.0412e+08	1.53528e+07	2.37455e+07	4.43069e+07
	Core matrisome	ECM Glycoproteins	Peroxidasin homolog OS=Homo sapiens OX=9606 GN=PXDN PE=1 SV=2	PXDN	Q92626	1.923	1	1	2	1*	1479	165.2	517		1			778952			959564	2.9257e+06	27566		2.78747e+06						924003						4.44908e+06				65229.3			387256
	Core matrisome	ECM Glycoproteins	Sushi repeat-containing protein SRPX OS=Homo sapiens OX=9606 GN=SRPX PE=1 SV=1	SRPX	P78539	62.522	23	9	179	9	464	51.5	65887	34.5	8	3		6.31298e+07	1.52725e+07	9.60777e+06	5.22265e+07	3.283e+06	6.20737e+06	1.46992e+07	6.30224e+07	2.38609e+07	1.31385e+07	1.50901e+07	839020	7.12935e+07	2.34502e+06	1.40665e+07	3.779e+06	3.1177e+07	1.6388e+07	1.6388e+07	8.25139e+06	9.60714e+06	7.16009e+06	3.94192e+06	7.59257e+06	3.92956e+07	9.33964e+06	1.41851e+06
	Core matrisome	ECM Glycoproteins	Transforming growth factor-beta-induced protein ig-h3 OS=Homo sapiens OX=9606 GN=TGFBI PE=1 SV=1	TGFBI	Q15582	340.247	42	32	674	32	683	74.6	352714	2.94	32	2		2.16228e+07	2.97661e+07	3.19297e+07	4.97692e+07	3.93284e+07	8.60095e+07	2.43859e+08	3.83817e+07	2.21719e+07	8.22194e+07	4.25483e+07	5.10149e+07	9.96582e+07	9.67683e+07	1.36175e+08	6.89691e+07	9.58138e+07	4.36954e+07	4.36954e+07	7.27939e+07	3.11825e+07	2.73247e+07	7.72595e+07	6.69095e+07	3.12703e+07	6.21024e+07	3.62461e+07
	Core matrisome	ECM Glycoproteins	Thrombospondin-1 OS=Homo sapiens OX=9606 GN=THBS1 PE=1 SV=2	THBS1	P07996	30.6	6	6	7	6	1170	129.3	3452		6			239560			919732		33271.1	1.03633e+06	395506		54145.1	1.0083e+06	347763			384400	1.07936e+06	3.07609e+06	1.4552e+06	1.4552e+06	485334	662695	385029	1.09661e+06	1.06172e+07		1.22406e+06	365765
	Core matrisome	ECM Glycoproteins	Thrombospondin-4 OS=Homo sapiens OX=9606 GN=THBS4 PE=1 SV=2	THBS4	P35443	4.301	3	2	5	2	961	105.8	1403		2			507392			148883	616160	83281.7					935247		2.21072e+07		1.5651e+06			2.18948e+06	2.18948e+06	408402
	Core matrisome	ECM Glycoproteins	Thrombospondin type-1 domain-containing protein 4 OS=Homo sapiens OX=9606 GN=THSD4 PE=2 SV=2	THSD4	Q6ZMP0	13.612	6	6	9	6	1018	112.4	2658	2.19	5	1			773702	530163	532838	862077	276349	789181	2.28015e+06	1.10624e+06	88638.7	3.57582e+06		3.50343e+06	1.29088e+06	476650	723330	3.46388e+06	2.53305e+06	2.53305e+06	2.05327e+06	309537	90519.7	1.76976e+06	808105		6.36998e+06	1.4452e+06
	Core matrisome	ECM Glycoproteins	Tubulointerstitial nephritis antigen-like OS=Homo sapiens OX=9606 GN=TINAGL1 PE=1 SV=1	TINAGL1	Q9GZM7	278.337	66	21	425	21	467	52.4	201092	75.09	19	5		4.34125e+07	8.73076e+07	6.65227e+07	8.33138e+07	5.70539e+07	3.51311e+07	7.63056e+07	3.7299e+07	1.03745e+08	1.49083e+07	5.34644e+07	4.77489e+07	7.97652e+07	4.52085e+07	5.86128e+07	1.12642e+08	5.37542e+07	6.86123e+07	6.86123e+07	1.57102e+08	2.51834e+07	1.93877e+07	5.07671e+07	4.0654e+07	3.91553e+07	4.72232e+07	4.34794e+08
	Core matrisome	ECM Glycoproteins	Tenascin OS=Homo sapiens OX=9606 GN=TNC PE=1 SV=3	TNC	P24821	285.871	20	34	339	34	2201	240.7	154091	2.6	34	1		1.25669e+06	1.23223e+07	1.30035e+07	2.42872e+07	2.53751e+07	9.9285e+07	6.58252e+07	1.66089e+07	1.81617e+07	3.88471e+07	7.66837e+07	5.58124e+06	3.64191e+07	4.23301e+07	1.03008e+08	1.5504e+07	3.33355e+07	5.12793e+07	5.12793e+07	1.32769e+07	1.28007e+07	1.71129e+07	5.43959e+07	2.78867e+07	1.01346e+07	3.20251e+07	2.29663e+07
	Core matrisome	ECM Glycoproteins	Vitronectin OS=Homo sapiens OX=9606 GN=VTN PE=1 SV=1	VTN	P04004	241.567	35	28	1254	28	478	54.3	670280	2.29	27	2		2.35588e+08	1.30537e+08	7.53809e+07	2.21159e+08	1.19051e+08	5.17219e+07	1.50278e+08	1.00396e+08	1.99834e+08	2.04076e+08	1.82612e+08	2.93007e+07	2.21782e+08	1.54472e+08	8.10825e+07	1.0706e+08	2.47319e+08	1.95679e+08	1.95679e+08	1.61453e+08	1.51974e+07	4.83427e+07	1.88035e+07	3.75451e+07	1.65692e+07	1.90557e+08	1.70166e+08
	Core matrisome	ECM Glycoproteins	von Willebrand factor A domain-containing protein 1 OS=Homo sapiens OX=9606 GN=VWA1 PE=1 SV=1	VWA1	Q6PCB0	31.458	11	3	22	3	445	46.8	9233		3			8.49867e+07	718805	707240	259212	2.34331e+06	9.77615e+06	2.83675e+06	125260	2.20381e+06	3.06028e+06	3.22716e+06	1.30915e+06	1.71201e+06	2.76809e+06	5.79373e+06	2.89291e+06	368954	107992	107992	608267	615770	1.51128e+06	396061	1.74041e+06	707108	1.27635e+06	1.02251e+06
	Core matrisome	ECM Glycoproteins	von Willebrand factor OS=Homo sapiens OX=9606 GN=VWF PE=1 SV=4	VWF	P04275	9.01	1	3	9	2	2813	309.1	3957		3												1.47975e+06	613193		2.50919e+06		502478		2.73831e+06						357500	330607		773229	235322
	Core matrisome	ECM Glycoproteins	CCN family member 5 OS=Homo sapiens OX=9606 GN=CCN5 PE=1 SV=1	WISP2	O76076	19.541	20	3	9	3	250	26.8	4115		3				285994		1.28216e+06		149399	749409	2.3463e+06	3.65835e+06				758117	171723			1.58394e+06	2.72673e+06	2.72673e+06	626195		2.8926e+06	94993.7			1.374e+06	1.10068e+06
	Core matrisome	Proteoglycans	Asporin OS=Homo sapiens OX=9606 GN=ASPN PE=1 SV=2	ASPN	Q9BXN1	53.032	23	7	90	7	380	43.4	40503		7			1.67436e+07	3.31212e+06	4.65393e+06	1.30172e+07	1.05513e+07	5.55406e+06	1.59871e+07		1.27792e+06	3.18641e+07	4.30721e+06	905231	2.14865e+07	4.42747e+07	6.12973e+06	1.86e+07	1.07749e+06	1.44972e+06	4.02201e+06	8.83934e+06	6.32688e+06	1.29423e+07	1.89668e+07	1.57406e+07	8.20521e+06	1.36564e+07	1.91099e+07
	Core matrisome	Proteoglycans	Biglycan OS=Homo sapiens OX=9606 GN=BGN PE=1 SV=2	BGN	P21810	109.645	36	11	149	10	368	41.6	77498	0	11	1		8.74719e+06	9.07655e+06	2.84727e+07	3.83713e+07	3.95084e+07					1.14224e+07	1.51727e+07	2.84666e+07	1.74271e+07	1.04792e+07	174965	2.01735e+06	3.11594e+06	539109	1.41946e+07	2.98232e+07	7.07838e+06	2.43771e+07	2.03121e+07	828393		3.42948e+06
	Core matrisome	Proteoglycans	Decorin OS=Homo sapiens OX=9606 GN=DCN PE=1 SV=1	DCN	P07585	235.504	50	27	1004	26	359	39.7	541487	2.18	27	1		1.71614e+08	7.45e+07	3.24543e+08	3.28958e+08	3.77105e+08		1.10474e+06	2.43885e+06	2.32957e+06	1.29295e+08	1.24395e+08	1.35973e+08	2.07444e+08	2.25342e+08	2.76777e+06	2.23942e+06		315504	1.39099e+08	9.32551e+07	1.10819e+08	1.0069e+08	2.30775e+08		1.90147e+06
	Core matrisome	Proteoglycans	Hyaluronan and proteoglycan link protein 1 OS=Homo sapiens OX=9606 GN=HAPLN1 PE=2 SV=2	HAPLN1	P10915	17.509	8	3	5	3	354	40.1	3093		3					20958.9	82951.9	74791.2	1.93836e+07	2.56152e+07	1.36992e+07	1.44679e+07		38856.7		73808.5		5.902e+07	2.05617e+07	5.25632e+07	1.25204e+07		158122	502135	985765	424569	3.35184e+06	7.39645e+06	1.07575e+07	1.18479e+07
	Core matrisome	Proteoglycans	Basement membrane-specific heparan sulfate proteoglycan core protein OS=Homo sapiens OX=9606 GN=HSPG2 PE=1 SV=4	HSPG2	P98160	2130.89	48	172	4142	172	4391	468.5	1995823	222.42	165	22		3.39101e+08	6.63348e+08	4.50356e+08	6.71662e+08	4.15245e+08	31764.3	24562.6		146850	9.09398e+08	4.62404e+08	5.86757e+08	4.83715e+08	6.75639e+08	136498				5.86897e+08	5.77016e+08	2.76958e+08	1.74247e+08	6.98789e+08	53603.6
	Core matrisome	Proteoglycans	Lumican OS=Homo sapiens OX=9606 GN=LUM PE=1 SV=2	LUM	P51884	95.257	29	11	145	11	338	38.4	67243		11			5.02157e+06	1.86111e+06	9.18316e+06	9.53148e+06	1.21671e+07	5.48459e+07	1.73136e+06		927522	2.05791e+07	4.62196e+06	1.2624e+07	1.64626e+07	2.43396e+07	6.23109e+06	1.79503e+06	1.80488e+06	1.01409e+06	3.42994e+06	8.47194e+06	1.3222e+07	2.18718e+06	1.26971e+07	1.88071e+07	1.39434e+06	7.60442e+06	8.98299e+06
	Core matrisome	Proteoglycans	Mimecan OS=Homo sapiens OX=9606 GN=OGN PE=1 SV=1	OGN	P20774	138.871	45	15	187	15	298	33.9	109052		15			1.08704e+07	4.51471e+06	9.63825e+06	3.07908e+07	1.13803e+07	4.06077e+07	8.35229e+08	1.09305e+09	2.32441e+07	4.99874e+07	4.53869e+06	8.31407e+06	1.44293e+07	9.03052e+06	3.92898e+08	8.36338e+08	1.06059e+09	9.46025e+08	2.65501e+06	5.96545e+06	1.08277e+07	1.92593e+06	2.96743e+06	6.569e+08	9.59915e+08	9.66705e+08	9.36282e+08
	Core matrisome	Proteoglycans	Prolargin OS=Homo sapiens OX=9606 GN=PRELP PE=1 SV=1	PRELP	P51888	105.43	42	15	421	15	382	43.8	211473		15			3.0116e+07	7.82597e+06	1.71712e+07	3.98408e+07	3.61481e+07	6.5637e+06	9.64628e+06	4.21903e+07	3.24993e+07	3.52038e+08	1.57878e+07	9.03528e+06	4.4045e+07	3.60228e+07	7.72401e+06	6.44277e+06	1.0087e+07	4.61426e+07	9.40792e+06	2.45571e+07	1.60554e+07	2.90879e+07	3.17308e+07	1.30823e+07	2.81329e+08	1.42652e+08	5.80777e+07
	Core matrisome	Proteoglycans	Bone marrow proteoglycan OS=Homo sapiens OX=9606 GN=PRG2 PE=1 SV=2	PRG2	P13727	84.882	32	10	934	10	222	25.2	505270	64.29	9	1		7.1552e+07	6.65856e+07	1.82233e+07	4.41345e+07	1.02726e+08	1.93123e+06	6.65774e+06	27570.3	1.23473e+06	6.46602e+07	5.99209e+07	5.13923e+07	1.25917e+08	5.94476e+07	944678	504798	1.02683e+06	1.24598e+06	1.93464e+08	4.1154e+07	2.08658e+07	4.3461e+07	3.55044e+07	3.50449e+06	483609
	Core matrisome	Proteoglycans	Proteoglycan 3 OS=Homo sapiens OX=9606 GN=PRG3 PE=1 SV=2	PRG3	Q9Y2Y8	21.665	21	3	131	3	225	25.4	53951	55.62	1	2		2.68012e+07	1.03612e+08	3.18084e+07	5.21458e+07	1.21191e+08	498843		1.1711e+06	421537	3.62943e+07	1.05283e+08	2.41459e+07	1.24614e+08	6.83854e+07			556587		9.85429e+07	1.08382e+08	6.51133e+06	3.82912e+07	3.5328e+07			850441	676691
	Core matrisome	Proteoglycans	Proteoglycan 4 OS=Homo sapiens OX=9606 GN=PRG4 PE=1 SV=3	PRG4	Q92954	10.524	2	2	3	2	1404	151	902		2			387828					1.7324e+06	307349	1.17556e+07	2.02909e+07	552507			317158		4.74478e+06	8.82152e+06	803934	1.15625e+07	3.14306e+06	165121				3.34522e+06	301310	510031	2.00902e+06
	Core matrisome	Proteoglycans	Tenascin-X OS=Homo sapiens OX=9606 GN=TNXB PE=1 SV=5	TNXB	P22105	77.293	7	16	40	16	4244	458.1	17525		16			1.95128e+07	1.19417e+07	1.46869e+07	6.28582e+06	1.40654e+07	8.90405e+06	3.5815e+06	1.33785e+06	9.41804e+06	1.02571e+07	2.0999e+07	5.43121e+06	8.43619e+06	1.41957e+07	7.68942e+06	1.43325e+06	5.2446e+06	2.94694e+06	9.07211e+06	1.53301e+07	6.26892e+06	567539	1.37434e+06	1.39467e+06	650945	7.15019e+06	618638
	Core matrisome	Proteoglycans	Versican core protein OS=Homo sapiens OX=9606 GN=VCAN PE=1 SV=3	VCAN	P13611	101.433	4	14	235	14	3396	372.6	119924		14			1.01192e+07	6.52045e+06	7.12969e+06	1.81924e+07	8.45909e+06	1.73682e+07	198846		150594	2.36742e+07	2.04281e+07	6.73411e+07	4.2139e+07	3.56813e+07	1.77841e+06			1.8034e+06	1.52911e+07	4.19265e+07	1.43405e+07	1.63551e+07	5.58883e+07	136403
	Matrisome-associated	ECM Regulators	Alpha-2-macroglobulin OS=Homo sapiens OX=9606 GN=A2M PE=1 SV=3	A2M	P01023	26.086	4	5	12	5	1474	163.2	4705		5			347845	2.70212e+06	1.12919e+06	5.85597e+06	1.18715e+06	611256	4.14036e+06	3.25382e+06	3.75133e+06		3.54482e+06	8.24977e+06	6.44874e+06	3.47494e+06	1.25211e+06	4.14515e+06	6.98743e+06	4.78424e+06	2.72346e+06	7.56789e+06	3.95052e+06	9.77571e+06	5.30896e+06	6.37314e+06	2.98555e+06	4.65919e+06	6.82366e+06
	Matrisome-associated	ECM Regulators	A disintegrin and metalloproteinase with thrombospondin motifs 4 OS=Homo sapiens OX=9606 GN=ADAMTS4 PE=1 SV=3	ADAMTS4	O75173	5.657	4	2	8	2	837	90.1		19.31		2		366862	1.23743e+06	1.06113e+06	536248	347162	3.46937e+06	1.03813e+07	1.34841e+06	8.90005e+06	279509	1.43385e+06	444409	1.5566e+06	426363	2.09703e+06	2.03682e+07	3.21548e+06	1.68946e+07		79567.5		1.39852e+06	546627	8.87976e+06	5.4628e+06	8.44498e+06	1.45263e+07
	Matrisome-associated	ECM Regulators	ADAMTS-like protein 1 OS=Homo sapiens OX=9606 GN=ADAMTSL1 PE=1 SV=4	ADAMTSL1	Q8N6G6	12.502	1	2	5	2	1762	193.3	2127		2			588325	1.55609e+06			605864			6.81198e+06	946465	3.37974e+06	1.20789e+06	1.70914e+06	4.09414e+06	5.50883e+06	305439		4.62847e+06	3.16767e+06	2.59525e+06	3.5666e+06	3.69906e+06	1.08124e+06	3.50377e+06	236243		3.02794e+06	189968
	Matrisome-associated	ECM Regulators	Protein AMBP OS=Homo sapiens OX=9606 GN=AMBP PE=1 SV=1	AMBP	P02760	77.893	23	8	86	8	352	39	49295		8			1.64365e+07	1.78105e+07	1.66018e+07	4.84801e+07	9.75383e+06	551430	390358	478522	2.06632e+06	1.24935e+07	1.42521e+07	4.9053e+06	4.1792e+07	1.25942e+07			260013	2.38967e+06	2.15867e+07	9.77411e+06	3.75589e+06	8.01852e+06	1.09558e+07		926563
	Matrisome-associated	ECM Regulators	UPF0450 protein C17orf58 OS=Homo sapiens OX=9606 GN=C17orf58 PE=3 SV=2	C17orf58	Q2M2W7	6.589	23	2	5	2	97	11.2	1465	4.02	1	1			502750		311269		74409.6			1.13358e+06		355596	212319	102701							162064	175779	394353	952436
	Matrisome-associated	ECM Regulators	Cathepsin B OS=Homo sapiens OX=9606 GN=CTSB PE=1 SV=3	CTSB	P07858	24.264	11	3	12	3	339	37.8	5368		3				459659					541250		928442	50730.9	1.70503e+06		1.10367e+06	511441	92803.5	273727		7.24479e+06		4.03578e+06	263541	828617	258148	695896		1.19158e+06
	Matrisome-associated	ECM Regulators	Cathepsin G OS=Homo sapiens OX=9606 GN=CTSG PE=1 SV=2	CTSG	P08311	125.354	47	18	254	18	255	28.8	118064		18			5.25674e+08	1.10812e+09	1.23659e+09	1.32086e+09	1.0781e+09	2.29909e+06	984208	3.61973e+06	2.12764e+06	8.86422e+06	1.16104e+09	1.46236e+09	1.22434e+09	8.89535e+08	3.65797e+06	1.19718e+06	5.50803e+06	1.70106e+06	6.77852e+08	1.15867e+09	1.70325e+09	1.18362e+09	1.20125e+09	576740	210355	3.6341e+06	1.57238e+06
	Matrisome-associated	ECM Regulators	Neutrophil elastase OS=Homo sapiens OX=9606 GN=ELANE PE=1 SV=1	ELANE	P08246	146.767	49	19	133	19	267	28.5	71211		19			3.11794e+06	1.79465e+07	2.05226e+07	1.53738e+07	3.06657e+07	38127.4	3.78903e+06	1.39284e+06	5.96085e+06	1.09485e+06	2.7405e+07	1.38096e+07	1.09858e+07	8.58281e+06	3.46903e+06	1.69375e+07	1.24877e+07	2.41003e+06	8.45695e+07	1.92279e+07	5.39221e+06	4.82344e+07	1.7421e+07	2.56148e+06	616307	1.6146e+06	3.6226e+07
	Matrisome-associated	ECM Regulators	Coagulation factor XIII A chain OS=Homo sapiens OX=9606 GN=F13A1 PE=1 SV=4	F13A1	P00488	23.264	6	4	5	4	732	83.2	2705		4				1.07078e+06			158815		206318	1.16679e+06	716644	5.57381e+06		491895	1.65215e+06	3.18059e+06	266929	301789	1.49221e+06	1.21181e+06	533072	325033	157603		533430		896200	313535
	Matrisome-associated	ECM Regulators	Coagulation factor IX OS=Homo sapiens OX=9606 GN=F9 PE=1 SV=2	F9	P00740	19.651	9	4	6	4	461	51.7	3031		4			630777	360965		511234		46015.6						237868		826693	23743.5			834693	372667	411131		175483		27020.2
	Matrisome-associated	ECM Regulators	Serine protease HTRA1 OS=Homo sapiens OX=9606 GN=HTRA1 PE=1 SV=1	HTRA1	Q92743	25.518	9	4	18	4	480	51.3	7960		4			2.89851e+06	1.93578e+06	1.02878e+06	2.51115e+06	535681				1.51824e+06	3.32142e+06	2.41546e+06	1.82422e+06	1.80734e+06	1.48447e+06			364302	866131	2.77109e+06	2.42558e+06	242099	1.7382e+06	644023	745249	601941	562408	387374
	Matrisome-associated	ECM Regulators	Inter-alpha-trypsin inhibitor heavy chain H1 OS=Homo sapiens OX=9606 GN=ITIH1 PE=1 SV=3	ITIH1	P19827	64.072	11	9	60	9	911	101.3	26918		9			3.15053e+06	2.08766e+06	2.01919e+06	3.49177e+06	1.65478e+06	1.97101e+06	905725	3.15594e+06	1.4436e+06	1.26188e+08	4.28531e+06	5.00226e+06	1.38822e+07	3.17357e+07	579039	464858	427684	64683.6	3.76899e+06	1.35003e+06	5.02711e+06	878284	1.07336e+07	1.07999e+07	306548	4.6657e+06	3.00656e+06
	Matrisome-associated	ECM Regulators	Inter-alpha-trypsin inhibitor heavy chain H2 OS=Homo sapiens OX=9606 GN=ITIH2 PE=1 SV=2	ITIH2	P19823	16.638	6	4	8	4	946	106.4	2322		4					299736			3.82134e+06	1.40146e+07	1.22385e+08	5.67015e+07		589627		239487	518102	1.60934e+07	8.91451e+06	1.42961e+08	3.79736e+07					948652	1.77503e+06	3.16175e+06	9.57569e+07	1.2238e+07
	Matrisome-associated	ECM Regulators	Protein-lysine 6-oxidase OS=Homo sapiens OX=9606 GN=LOX PE=1 SV=2	LOX	P28300	23.883	11	3	19	3	417	46.9	8321		3			1.35888e+06	421730	5.3724e+06	1.42417e+06	4.29789e+06	1.12859e+08	1.02921e+08	8.91963e+06	2.44653e+07	84013.3	2.7616e+06	1.10208e+07	9.68586e+06	1.21164e+07	9.4625e+07	4.8004e+07	3.66216e+07	2.50103e+07	1.17541e+07	5.50601e+06	2.46549e+06	3.93112e+06	6.98366e+06	2.23779e+08	7.22019e+06	2.63386e+07	1.60829e+07
	Matrisome-associated	ECM Regulators	Lysyl oxidase homolog 1 OS=Homo sapiens OX=9606 GN=LOXL1 PE=1 SV=2	LOXL1	Q08397	64.814	31	11	71	11	574	63.1	11736	103.26	5	6		3.07699e+06	4.35097e+06	7.255e+06	1.4205e+06	3.26298e+06	1.31965e+07	1.97473e+07	2.67547e+08	2.9975e+08	5.82918e+06	1.91879e+07	194167	3.36205e+06	3.80456e+06	1.42201e+07	1.72605e+07	2.69424e+08	2.5821e+08	2.57372e+06	3.8535e+06	3.4095e+06	2.96139e+06	7.80112e+06	8.43974e+06	1.54669e+07	2.62502e+08	2.79212e+07
	Matrisome-associated	ECM Regulators	Macrophage metalloelastase OS=Homo sapiens OX=9606 GN=MMP12 PE=1 SV=1	MMP12	P39900	16.585	16	5	16	5	470	54	3239	21.92	2	3			565797	894471	7.64261e+06	464941	18608.4	452948			126760	1.01738e+06		612850	1.88918e+06	210215			228320	660537	1.17115e+06				2.35118e+06	301100	1.13408e+06
	Matrisome-associated	ECM Regulators	Matrix metalloproteinase-23 OS=Homo sapiens OX=9606 GN=MMP23B PE=1 SV=2	MMP23B	O75900	6.545	5	2	8	2	390	43.9	3548	2.86	1	1			2.26351e+06	1.73761e+06		3.03198e+06	266699	1.95557e+06	851401	996823	81437.3	1.43696e+06		1.696e+06	51901.8	593326	2.43204e+06	5.58849e+06	953331				1.2131e+06	129040	4.97952e+06	2.21032e+06	414197	1.29976e+06
	Matrisome-associated	ECM Regulators	Matrix metalloproteinase-28 OS=Homo sapiens OX=9606 GN=MMP28 PE=1 SV=2	MMP28	Q9H239	6.246	2	1	2	1*	520	58.9	1174		1				781820	778237	260342	762444	161293	244162	44416.5	7870.32							314368		98973.3	433433		899123		169951	197190	144040	50680.6	7053.31
	Matrisome-associated	ECM Regulators	Plasminogen OS=Homo sapiens OX=9606 GN=PLG PE=1 SV=2	PLG	P00747	3.512	4	2	2	2	810	90.5	518		2			664134			1.20571e+06		165460	1.09947e+06	3.54344e+06	5.72524e+06				4.2845e+06		1.01757e+06	2.13182e+06	4.92253e+06	3.56725e+06	174635		6.69429e+06		2.9497e+06	926464	1.97582e+06	4.02507e+06	4.73416e+06
	Matrisome-associated	ECM Regulators	Alpha-1-antitrypsin OS=Homo sapiens OX=9606 GN=SERPINA1 PE=1 SV=3	SERPINA1	P01009	22.397	13	5	17	5	418	46.7	8726		5			270805	258498	80286.5	111734	987908	195271			780439	2.52469e+07	585853	482792	461869	1.38923e+06	426977	784476	655850	1.95585e+06	791483	1.58575e+06		475631		7.88184e+06		1.53337e+06	2.31508e+06
	Matrisome-associated	ECM Regulators	Alpha-1-antichymotrypsin OS=Homo sapiens OX=9606 GN=SERPINA3 PE=1 SV=2	SERPINA3	P01011	12.217	7	3	6	3	423	47.6	2434		3				5.06716e+07	1.34876e+07	5.03101e+06	8.8987e+06	899731					4.3487e+06	281606					2.65049e+06	3.39713e+06	652857	1.18205e+06		227738	3.48944e+06	3.06874e+06		9.88916e+06	2.51417e+06
	Matrisome-associated	ECM Regulators	Leukocyte elastase inhibitor OS=Homo sapiens OX=9606 GN=SERPINB1 PE=1 SV=1	SERPINB1	P30740	10.286	8	3	4	2	379	42.7	1574		3				215055	205128			1.58473e+06	653581	1.12437e+06	982505				341313			594674	1.10027e+06	1.42577e+06					593527	3.37501e+06	3.30054e+06	2.96073e+06	897005
	Matrisome-associated	ECM Regulators	Heparin cofactor 2 OS=Homo sapiens OX=9606 GN=SERPIND1 PE=1 SV=3	SERPIND1	P05546	4.92	4	2	2	2	499	57	526		2								485401	3.93927e+06	9.11127e+06	1.83745e+07	2.77539e+06	1.55635e+06			123315	903817	2.01898e+06	1.63621e+07	2.53219e+07						3.6685e+06	1.45628e+06	1.43205e+07	3.06895e+06
	Matrisome-associated	ECM Regulators	Glia-derived nexin OS=Homo sapiens OX=9606 GN=SERPINE2 PE=1 SV=1	SERPINE2	P07093	16.986	10	3	7	3	398	44	4439		3					1.32005e+06		206714	341826	3.85482e+06	352928	261853		1.18413e+06		492581				1.68452e+06	1.30873e+06	563174					906245		9.84934e+06
	Matrisome-associated	ECM Regulators	Serpin H1 OS=Homo sapiens OX=9606 GN=SERPINH1 PE=1 SV=2	SERPINH1	P50454	59.881	20	7	19	7	418	46.4	10536		7			109700				849194	2.90188e+06	316292	155361			1.31868e+06	1.23466e+06			711060		1.23744e+06	151233	135435	966704	334032	2.44891e+06	495672	520158		270907
	Matrisome-associated	ECM Regulators	Antileukoproteinase OS=Homo sapiens OX=9606 GN=SLPI PE=1 SV=2	SLPI	P03973	51.332	32	6	192	6	132	14.3	89465		6			1.29147e+08	7.97141e+07	4.2244e+07	1.22359e+08	4.91906e+07	8.93281e+06	9.96872e+06	1.84414e+06	6.21188e+06	1.26429e+07	4.51809e+07	6.38882e+06	7.39746e+07	1.49079e+07	1.28517e+07	3.53635e+06	6.08799e+06	3.724e+06	2.84122e+07	3.34507e+07	6.42764e+06	2.40811e+07	1.14786e+07	2.11449e+07	1.36599e+06	1.29285e+07	3.81971e+06
	Matrisome-associated	ECM Regulators	Protein-glutamine gamma-glutamyltransferase 2 OS=Homo sapiens OX=9606 GN=TGM2 PE=1 SV=2	TGM2	P21980	218.393	38	26	353	26	687	77.3	158651	66.73	25	1	Met-loss+Acetyl [N-Term]	1.0831e+07	1.99812e+07	5.03905e+07	2.49626e+07	1.34563e+07	16135.3	3.80069e+06	251863	419540	6.94209e+07	6.28179e+07	1.31869e+07	2.98081e+07	8.34237e+07	2.05733e+06	1.07368e+06	4.02781e+06	785539	3.94485e+07	2.23214e+07	1.36307e+07	2.22428e+07	2.44265e+07	7.34408e+06	894697	255041	915576
	Matrisome-associated	ECM Regulators	Metalloproteinase inhibitor 3 OS=Homo sapiens OX=9606 GN=TIMP3 PE=1 SV=2	TIMP3	P35625	105.062	54	11	999	11	211	24.1	557217	14.01	10	3		1.67904e+08	1.4239e+08	4.96722e+07	3.10326e+08	4.41807e+07	3.14901e+06	1.7002e+08	1.25887e+07	1.38359e+07	3.73734e+07	1.02073e+08	1.83457e+07	7.87451e+07	4.05156e+07	8.38223e+06	2.88118e+08	7.60956e+07	3.47214e+07	5.77472e+07	6.21831e+07	1.57336e+07	4.8988e+07	1.70743e+07	9.67306e+06	1.09248e+07	1.30231e+08	6.62425e+07
	Matrisome-associated	ECM-affiliated Proteins	Annexin A1 OS=Homo sapiens OX=9606 GN=ANXA1 PE=1 SV=2	ANXA1	P04083	10.142	7	3	6	3	346	38.7	3066		3			213836	235284	143614				2.17092e+06	788775		37543	166695	145094	2.57068e+06		939564	1.48012e+06	586052			565444	195224	642419	202408	1.00657e+07	4.522e+06	64900.1	1.13883e+06
	Matrisome-associated	ECM-affiliated Proteins	Annexin A2 OS=Homo sapiens OX=9606 GN=ANXA2 PE=1 SV=2	ANXA2	P07355	20.038	25	6	18	6	339	38.6	2382	24.54	5	1	Met-loss+Acetyl [N-Term]	1.20912e+06	733805		2.37507e+06		1.69681e+06	6.65815e+06		4.70252e+06	1.29189e+06	1.26428e+06	3.01773e+06	9.05938e+06	1.06023e+07	649127	5.10097e+06	1.93204e+06	113618	2.87467e+06	1.36694e+06	3.79703e+06	2.86268e+06	680771	8.26413e+06	884088	922354	1.47208e+06
	Matrisome-associated	ECM-affiliated Proteins	Annexin A4 OS=Homo sapiens OX=9606 GN=ANXA4 PE=1 SV=4	ANXA4	P09525	15.575	10	3	8	2	319	35.9	4790		3					190455	52184.9		1.67114e+06	569409	176979	405388		210612					2.54337e+06	153476	170344	17375.2	85369.4	5499.17	93090.5	236197		2.27048e+06	197911	114445
	Matrisome-associated	ECM-affiliated Proteins	Annexin A5 OS=Homo sapiens OX=9606 GN=ANXA5 PE=1 SV=2	ANXA5	P08758	5.053	6	2	13	2	320	35.9	4159		2			1.59044e+06	2.75083e+06	4.26753e+06	3.87046e+06	5.11731e+06	4.89805e+06	1.56801e+08	2.26349e+07	7.00856e+06	105182	5.2657e+06	3.92767e+06	5.36287e+06	2.31822e+06	1.01954e+07	7.95482e+08	6.66758e+08	3.65634e+07	1.43062e+06	3.34009e+06	4.58329e+06	3.78431e+06	4.33093e+06	2.14776e+07	1.78533e+07	4.46574e+07	5.01039e+07
	Matrisome-associated	ECM-affiliated Proteins	Annexin A7 OS=Homo sapiens OX=9606 GN=ANXA7 PE=1 SV=3	ANXA7	P20073	20.56	8	4	20	4	488	52.7	10144		4			1.07208e+06	541897	1.48373e+06		95039.1	1.0393e+07	1.14489e+08	5.93003e+07	8.03715e+07	891620	2.52135e+06	598239	500002	1.28629e+06	3.49488e+07	8.10411e+07	1.24429e+08	5.47203e+07	1.03571e+06	2.37443e+06		1.62884e+06	911411	2.57108e+07	2.35132e+07	9.643e+07	5.78386e+07
	Matrisome-associated	ECM-affiliated Proteins	Complement C1q subcomponent subunit A OS=Homo sapiens OX=9606 GN=C1QA PE=1 SV=2	C1QA	P02745	4.815	4	1	9	1*	245	26	2144		1			1.9247e+06			1.17977e+06	1.71655e+06	1.27166e+07	5.53779e+07	1.40328e+07	3.14558e+07	1.6716e+06	4.23474e+06	5.05703e+06	1.88187e+06	1.12473e+06	9.78448e+06	2.76462e+07	8.56015e+06	1.83207e+07	1.89734e+06	6.70097e+06	214741			2.03113e+07	7.1592e+06	8.50304e+06	8.00618e+06
	Matrisome-associated	ECM-affiliated Proteins	Complement C1q subcomponent subunit B OS=Homo sapiens OX=9606 GN=C1QB PE=1 SV=3	C1QB	P02746	23.306	12	3	12	3	253	26.7	5253		3			7.32984e+06	2.54266e+06	1.3314e+06	584901	407096	17874.2	235156	692400	178939	668181	1.19825e+06	1.01493e+07	793080	512390	307049		658246	1.20554e+06	254326	4.24079e+06	1.54371e+06	328735	359170	564976	588612	763242	529586
	Matrisome-associated	ECM-affiliated Proteins	Complement C1q subcomponent subunit C OS=Homo sapiens OX=9606 GN=C1QC PE=1 SV=3	C1QC	P02747	29.829	21	4	34	4	245	25.8	12476		4			9.7505e+06	9.59835e+06	1.77304e+07	1.15234e+06	6.48575e+06	233392	438849	2.61351e+06	1.60246e+06	2.26081e+07	1.30879e+07	8.87671e+06	3.44428e+06	1.68432e+07	2.76264e+06		2.31449e+06	843775	4.49579e+06	1.09744e+07	1.05118e+06	2.20522e+07	5.21144e+06			1.51933e+06
	Matrisome-associated	ECM-affiliated Proteins	Gremlin-1 OS=Homo sapiens OX=9606 GN=GREM1 PE=1 SV=1	GREM1	O60565	21.689	27	3	13	2	184	20.7	4187	2.64	2	1		1.30227e+07	650833	1.5523e+06	1.02188e+06	284689	330546	387152		49189.9		563489		719521	593217	321539			26792.7	2.23738e+06	623708	427406	337007	347585
	Matrisome-associated	ECM-affiliated Proteins	Hemopexin OS=Homo sapiens OX=9606 GN=HPX PE=1 SV=2	HPX	P02790	23.528	15	3	3	3	462	51.6	1699		3			617030					3.31845e+07	8.44603e+06	1.43246e+07	2.69641e+06	946341			376038		3.25454e+07	1.21255e+07	2.94048e+07	4.02201e+06					104935	8.12185e+06	2.84027e+06	1.88064e+06	2.54326e+07
	Matrisome-associated	ECM-affiliated Proteins	Galectin-1 OS=Homo sapiens OX=9606 GN=LGALS1 PE=1 SV=2	LGALS1	P09382	60.508	61	7	73	7	135	14.7	33193	29.04	6	1	Met-loss+Acetyl [N-Term]	891722	3.66637e+06	5.72843e+06	470169	3.02538e+06	2.15004e+07	1.45853e+07	3.58524e+07	6.21767e+06	6.89598e+06	6.2765e+06	958532	1.05813e+07	3.85645e+06	1.78465e+07	3.64748e+06	2.5048e+07	1.41946e+07	4.29019e+06	1.65281e+06	1.12966e+06	8.83419e+06	2.48586e+07	2.12129e+07	9.06729e+06	5.78632e+06	9.81572e+06
	Matrisome-associated	ECM-affiliated Proteins	Galectin-3 OS=Homo sapiens OX=9606 GN=LGALS3 PE=1 SV=5	LGALS3	P17931	20.636	13	4	28	4	250	26.1	14670		4				363376		334993	140139	1.80279e+08	2.1253e+08	2.15303e+08	7.42763e+07	18769.6	571471	119237	1.80569e+06	3.29282e+06	3.14887e+08	1.10185e+08	3.93775e+08	1.39099e+08	1.79278e+06			534870	1.19783e+06	6.12077e+07	7.40538e+07	1.16051e+08	1.33937e+08
	Matrisome-associated	ECM-affiliated Proteins	Galectin-4 OS=Homo sapiens OX=9606 GN=LGALS4 PE=1 SV=1	LGALS4	P56470	80.672	51	12	260	11	323	35.9	138128	8.98	10	2	Met-loss+Acetyl [N-Term]	3.05836e+07	1.05391e+07	8.05412e+06	6.11171e+07	6.16681e+07	249798			1.36937e+06	3.25659e+07	1.34e+07	2.36945e+07	4.55589e+07	2.66213e+07					1.26201e+08	4.8307e+07	2.51305e+07	1.49465e+07	3.20024e+06	68220.8	92398.4		92455.1
	Matrisome-associated	ECM-affiliated Proteins	Galectin-9 OS=Homo sapiens OX=9606 GN=LGALS9 PE=1 SV=2	LGALS9	O00182	32.234	17	6	19	5	355	39.5	9353		6			378254					7.97746e+08	1.04893e+09	3.19871e+08	6.21176e+08	679299	1.62755e+06	1.45807e+06	302010	968004	1.1487e+09	7.69703e+08	6.14587e+08	5.86897e+08	962365	2.85718e+06	2.36746e+06	2.13824e+06		2.58421e+08	2.22286e+08	3.85148e+08	8.58454e+08
	Matrisome-associated	ECM-affiliated Proteins	Protein ERGIC-53 OS=Homo sapiens OX=9606 GN=LMAN1 PE=1 SV=2	LMAN1	P49257	35.946	14	7	36	7	510	57.5	19184		7			3.29446e+06	1.18113e+06	2.72962e+06	598849	3.9468e+06	2.75849e+07	2.42959e+07	4.76873e+06	4.72505e+06	2.61001e+07	1.00079e+06	1.49635e+06	1.18201e+06	3.50049e+06	4.02734e+07	1.1675e+07	1.88133e+07	3.42994e+06	3.44712e+06	3.4021e+06	2.72893e+06	350244	699480	1.57606e+07	4.09871e+06	1.20708e+06	6.66861e+06
	Matrisome-associated	ECM-affiliated Proteins	Mucin-1 OS=Homo sapiens OX=9606 GN=MUC1 PE=1 SV=3	MUC1	P15941	19.667	2	2	3	2	1255	122	1655		2						150706		3.84217e+07	1.19775e+07	2.25786e+07	1.9435e+07					212206	3.33753e+07	6.51551e+06	2.52321e+07	2.65501e+06	754571	112631		212265		6.47743e+06	2.65928e+06	1.01327e+06	4.63061e+06
	Matrisome-associated	ECM-affiliated Proteins	Mucin-2 OS=Homo sapiens OX=9606 GN=MUC2 PE=1 SV=2	MUC2	Q02817	503.344	11	43	648	42	5179	540	282474	224.87	40	11		4.6972e+07	3.90475e+07	2.77029e+07	2.65579e+07	5.67847e+07	2.34652e+07	6.1624e+07	2.30166e+07	1.66434e+07	3.51356e+07	1.00949e+08	6.39413e+08	8.6724e+07	3.65164e+07	4.91553e+07	2.91584e+07	5.45899e+07	9.40792e+06	1.47238e+08	1.2495e+08	3.26391e+07	7.0141e+07	7.92054e+07	3.13031e+07	2.08567e+07	1.15108e+08	1.41899e+06
	Matrisome-associated	ECM-affiliated Proteins	Mucin-5AC OS=Homo sapiens OX=9606 GN=MUC5AC PE=1 SV=4	MUC5AC	P98088	669.364	24	76	976	75	5654	585.2	431470	74.01	73	10		1.77337e+08	6.02961e+07	4.37277e+07	7.62519e+07	3.86451e+07	9.55372e+06	3.76794e+07	2.89251e+08	1.84484e+08	1.17087e+08	5.06121e+07	9.35137e+08	1.79865e+08	3.90096e+08	2.9528e+06	1.01919e+08	2.9658e+08	1.93464e+08	1.91568e+08	5.53522e+07	2.00944e+09	3.29969e+07	8.05951e+07	2.67828e+08	1.82394e+08	3.28348e+08	1.44715e+07
	Matrisome-associated	ECM-affiliated Proteins	Mucin-6 OS=Homo sapiens OX=9606 GN=MUC6 PE=1 SV=3	MUC6	Q6W4X9	165.232	14	23	196	22	2439	256.9	56675	185.95	14	11		1.1471e+07	7.99071e+07	9.32927e+07	7.50098e+06	1.40711e+07	30654.2	8.70853e+07	8.77543e+07	7.46377e+07	1.23175e+08	1.94177e+07	1.41405e+07	6.87469e+07	1.20962e+08	632554	1.77642e+08	1.54412e+08	9.85429e+07	3.57756e+07	2.09798e+07	1.53578e+08	6.70528e+07	1.80168e+07	2.24985e+08	1.16958e+08	1.0524e+08	908056
	Matrisome-associated	ECM-affiliated Proteins	Regenerating islet-derived protein 4 OS=Homo sapiens OX=9606 GN=REG4 PE=1 SV=1	REG4	Q9BYZ8	13.444	14	2	8	2	158	18.2	2977		2			3.8177e+06	2.22126e+06	558514	373543				834500	6.78145e+06		279936	1.08648e+06		1.16595e+06	116787			3.14306e+06	2.93726e+06	2.34041e+06	779417		303118
	Matrisome-associated	ECM-affiliated Proteins	Semaphorin-3B OS=Homo sapiens OX=9606 GN=SEMA3B PE=1 SV=1	SEMA3B	Q13214	21.644	8	5	11	5	749	83.1	3774	7.46	4	1			2.18547e+06	409803	1.93564e+06		2.49796e+06	1.24523e+07	4.89719e+06	1.32869e+07	75860.8	1.15141e+06	252018	239796	754887	4.41757e+06	2.91679e+06	9.12286e+06	9.07211e+06	2.22473e+06	675906	775714		78175.2	2.4552e+06	3.64245e+06	8.03761e+06	622043
	Matrisome-associated	ECM-affiliated Proteins	Semaphorin-3G OS=Homo sapiens OX=9606 GN=SEMA3G PE=1 SV=1	SEMA3G	Q9NS98	2.599	2	1	3	1*	782	86.6		8.12		1		5.88637e+06	122296		131857	1.21685e+06	4.90301e+07	1.49138e+07	1.87706e+07	1.19484e+07		43651.6				4.76475e+07	1.41869e+07	4.43626e+07	1.52911e+07	2.20321e+06		1.45721e+06		111893	1.23002e+07	1.28831e+07	9.06013e+06	9.43423e+06
	Matrisome-associated	Secreted Factors	Angiopoietin-related protein 2 OS=Homo sapiens OX=9606 GN=ANGPTL2 PE=1 SV=1	ANGPTL2	Q9UKU9	12.416	6	3	6	3	493	57.1	1643	2.32	2	1						192066	274850		192456	296610				146586							195934					350459	304824
	Matrisome-associated	Secreted Factors	C-C motif chemokine 19 OS=Homo sapiens OX=9606 GN=CCL19 PE=1 SV=1	CCL19	Q99731	17.098	23	2	27	2	98	11	12461		2			1.18236e+07	4.5259e+06	2.3228e+06	3.0056e+06	1.31859e+06	96789.7	1.47394e+06	3.60354e+06	1.10445e+07	736032	4.7881e+06	2.84134e+06	1.80767e+06	1.60659e+06	547889		2.25378e+06	8.74682e+06		1.48676e+06	468298	1.9411e+06	1.35297e+06	1.2848e+06		1.08128e+06	374479
	Matrisome-associated	Secreted Factors	C-C motif chemokine 21 OS=Homo sapiens OX=9606 GN=CCL21 PE=1 SV=1	CCL21	O00585	17.009	20	2	4	2	134	14.6	1843		2						3.46039e+06	823494		238651	563940	358079		473143											65935.6	119193		104302
	Matrisome-associated	Secreted Factors	Cytokine receptor-like factor 1 OS=Homo sapiens OX=9606 GN=CRLF1 PE=1 SV=1	CRLF1	O75462	4.948	2	1	1	1*	422	46.3	601		1					247746			23042.9		147548
	Matrisome-associated	Secreted Factors	Stromal cell-derived factor 1 OS=Homo sapiens OX=9606 GN=CXCL12 PE=1 SV=1	CXCL12	P48061	16.419	32	3	81	3	93	10.7	27709	69.96	2	1		1.37578e+07	9.74208e+06	2.45909e+06	2.15307e+07	1.95393e+06	284979	1.09567e+06	1.13757e+07	1.2578e+07	1.21634e+07	5.59867e+06	1.05691e+06	9.16785e+06	2.02781e+06	4.22163e+06	3.80261e+06	1.41322e+07	8.08713e+06	5.91012e+06	4.04323e+06	1.18657e+06	937248	2.27203e+06	1.46162e+06	620879	8.68574e+06	1.33769e+06
	Matrisome-associated	Secreted Factors	C-X-C motif chemokine 13 OS=Homo sapiens OX=9606 GN=CXCL13 PE=1 SV=1	CXCL13	O43927	50.214	50	7	898	7	109	12.7	456423	149.5	4	5		1.07081e+09	4.27716e+08	1.79007e+08	6.56751e+07	3.27828e+08	5.6749e+06	2.01837e+07	1.24752e+08	1.26376e+09	4.53651e+08	5.10483e+08	2.72235e+08	1.62434e+08	1.99544e+08	5.85791e+07	1.63101e+08	6.8478e+07	7.77343e+08	3.04426e+08	3.22085e+08	1.51235e+08	7.82914e+07	7.84455e+07	1.4101e+08	2.18011e+07	8.43011e+07	1.94164e+09
	Matrisome-associated	Secreted Factors	Fibroblast growth factor 2 OS=Homo sapiens OX=9606 GN=FGF2 PE=1 SV=3	FGF2	P09038	7.018	7	2	6	2	288	30.8	3561		2			620610	1.18254e+07	1.31214e+07	2.11764e+06		276687	1.68681e+06	1.06991e+06	1.9525e+06	105188	1.24838e+07	893894	1.85255e+06	1.17891e+06	750006	741913	1.13121e+06	1.07784e+06	1.4428e+06	1.31304e+06	591943		2.0367e+06		1.00668e+06	1.54316e+06
	Matrisome-associated	Secreted Factors	Platelet-derived growth factor subunit B OS=Homo sapiens OX=9606 GN=PDGFB PE=1 SV=1	PDGFB	P01127	8.754	8	2	4	2	241	27.3	1330	5.69	1	1			1.95898e+07	1.91446e+06	3.49928e+07	644189	360957	186880	2.19083e+06	1.39235e+06		2.19747e+07		718117		591291		248055	145996	212593			4.1225e+06	2.49987e+06	1.92171e+06	292499	1.17008e+06	648541
	Matrisome-associated	Secreted Factors	Protein S100-A11 OS=Homo sapiens OX=9606 GN=S100A11 PE=1 SV=2	S100A11	P31949	38.302	52	6	26	6	105	11.7	17936		6			180719	583409	927159	475117	460478	587203	2.67159e+06	74904.7	351214	83805.6	643262	433685	421951	405990	722075	1.60929e+06	46805.2	121969	320564	2.48273e+06	247799	1.60522e+06	803694	6.95935e+06	232007	928264
	Matrisome-associated	Secreted Factors	Protein S100-A6 OS=Homo sapiens OX=9606 GN=S100A6 PE=1 SV=1	S100A6	P06703	7.543	29	2	2	2	90	10.2	681	3.79	1	1	Met-loss+Acetyl [N-Term]	217312	461356		125321	868617	17434.4	933696		20842.3		56448	42048.7	152414		10445.8			84969.2	337184	1.07554e+06			483818		28996.1	626813
	Matrisome-associated	Secreted Factors	Protein S100-A8 OS=Homo sapiens OX=9606 GN=S100A8 PE=1 SV=1	S100A8	P05109	128.643	73	11	499	11	93	10.8	288013		11			1.92086e+07	2.9951e+07	7.16618e+07	1.54162e+07	7.41307e+07	1.46205e+06	1.11794e+07	4.64706e+07	5.98798e+07	6.00906e+06	9.12482e+07	6.79254e+07	2.14959e+07	1.00932e+07	8.21287e+06	1.30123e+07	5.75491e+06	9.51314e+07	3.51812e+08	3.63061e+07	3.48532e+07	8.96087e+08	2.18369e+07	5.74098e+07	1.5796e+09	3.61293e+08	1.63675e+08
	Matrisome-associated	Secreted Factors	Protein S100-A9 OS=Homo sapiens OX=9606 GN=S100A9 PE=1 SV=1	S100A9	P06702	197.893	69	14	383	14	114	13.2	249203		14			2.69854e+06	1.21152e+07	3.55727e+07	7.45391e+06	3.76606e+07	7.94681e+06	1.38249e+07	3.61311e+07	3.39793e+07	814174	6.55721e+07	5.03769e+07	6.47922e+06	8.01339e+06	7.1913e+06	2.22852e+07	8.30399e+06	5.616e+07	2.19264e+08	1.79634e+07	2.51817e+06	5.695e+08	4.02196e+06	4.5979e+07	1.14028e+09	2.40329e+08	1.42906e+08
	Matrisome-associated	Secreted Factors	Vascular endothelial growth factor B OS=Homo sapiens OX=9606 GN=VEGFB PE=1 SV=2	VEGFB	P49765	2.033	5	1	4	1*	207	21.6		9.68		1		2.70985e+06				801258		341132	1.90118e+07	1.22357e+06	2.08074e+06	871526	841371			124589		601723	568136	527886	164067			457654
	Matrisome-associated	Secreted Factors	Protein Wnt-2b OS=Homo sapiens OX=9606 GN=WNT2B PE=1 SV=2	WNT2B	Q93097	60.146	31	10	544	10	391	43.7	246128	137.51	4	7		1.0756e+08	5.74005e+07	2.32744e+07	4.52978e+07	3.41353e+07	6.83563e+06	3.65306e+07	4.26796e+07	5.52704e+07	3.85576e+07	1.96314e+07	5.67861e+06	7.14819e+07	3.60849e+07	2.7687e+06	1.52894e+07	6.76916e+07	1.87178e+07	2.09326e+07	1.39384e+07	9.92461e+06	1.42341e+07	5.53767e+06	640213	6.24926e+06	1.34997e+07	1.33267e+06
Non-matrisome	Other		3-ketoacyl-CoA thiolase, mitochondrial OS=Homo sapiens OX=9606 GN=ACAA2 PE=1 SV=2	ACAA2	P42765	13.453	6	2	3	2	397	41.9	1624		2						459761	369781	112374	670383				573545	732703	362374	145455	1.52641e+06	342676	367280			850908			327994	1.35253e+06		5.23217e+06
	Other		Very long-chain specific acyl-CoA dehydrogenase, mitochondrial OS=Homo sapiens OX=9606 GN=ACADVL PE=1 SV=1	ACADVL	P49748	44.121	15	8	20	8	655	70.3	9016		8			3.44126e+06	191124	1.38261e+06	475739	623884	6.177e+06	1.30456e+06	3.1095e+06	163131	2.52561e+06	120315	820589	637548	5.0309e+06	607648	2.7032e+06	1.30622e+06	2.40932e+06	450032	179018	483173		192931	1.06465e+06	541214	2.17484e+06	218132
	Other		Acetyl-CoA acetyltransferase, mitochondrial OS=Homo sapiens OX=9606 GN=ACAT1 PE=1 SV=1	ACAT1	P24752	19.575	8	2	12	2	427	45.2	4259	0	2	1		466466	1.86044e+07	3.17079e+07	4.56765e+07	1.29052e+06	1.15956e+06	3.55132e+07	1.17741e+07	2.06922e+06		3.15983e+07	1.11965e+06	74450.9		2.08859e+07	7.49406e+07		1.30061e+06		5.62477e+07	111636	8.97029e+06	5.55747e+07	4.77491e+07	3.30757e+06	563817	2.53591e+06
	Other		Aconitate hydratase, mitochondrial OS=Homo sapiens OX=9606 GN=ACO2 PE=1 SV=2	ACO2	Q99798	7.332	5	4	4	4	780	85.4	726		4					362847	754356	398827		950199			69079.1			468192	224470		150189	478188							188593
	Other		Acyl-coenzyme A thioesterase 9, mitochondrial OS=Homo sapiens OX=9606 GN=ACOT9 PE=1 SV=2	ACOT9	Q9Y305	10.052	5	2	3	2	439	49.9	1222		2								29478.5	1.12619e+06				134379		290343		161537	701461			19134.1			43068.8	69060.9	555802
	Other		Long-chain-fatty-acid--CoA ligase 4 OS=Homo sapiens OX=9606 GN=ACSL4 PE=1 SV=2	ACSL4	O60488	7.163	3	2	4	2	711	79.1	1718		2			545124				656179	23604.3	965948						1.27416e+06	437906	327455	626096					619339	152038	441987	385758
	Other		Actin, aortic smooth muscle OS=Homo sapiens OX=9606 GN=ACTA2 PE=1 SV=1	ACTA2	P62736	1004.57	82	71	2417	3	377	42	1326113	1.7	71	2		1.17597e+07	2.98737e+06	3.67619e+06	4.15054e+06	2.10539e+06	1.49734e+08	3.88652e+07	2.52506e+06	4.97201e+06	9.57033e+06	8.50468e+06	2.90262e+06	1.19644e+07	1.70786e+07	1.28519e+08	9.90397e+06	2.54638e+07	7.77592e+06	2.74834e+06	2.49531e+06	1.83079e+06	7.38864e+06	1.38115e+07	6.87486e+06	7.92039e+06	1.80509e+06	2.85648e+06
	Other		Actin, cytoplasmic 1 OS=Homo sapiens OX=9606 GN=ACTB PE=1 SV=1	ACTB	P60709	752.011	78	63	1879	27	375	41.7	1014592	11.69	62	3	Met-loss+Acetyl [N-Term]	2.30532e+07	3.41582e+08	4.16709e+08	2.61803e+07	4.15473e+07	2.67513e+08	1.84064e+08	4.18281e+07	2.95872e+07	4.75577e+07	4.38786e+08	3.88838e+08	5.24273e+07	3.5816e+08	1.60584e+08	7.21081e+07	9.43999e+08	7.90913e+08	4.20403e+07	4.46139e+08	3.5473e+08	4.51561e+07	3.14491e+08	4.11929e+08	1.6829e+08	4.79932e+07	8.07057e+07
	Other		Beta-actin-like protein 2 OS=Homo sapiens OX=9606 GN=ACTBL2 PE=1 SV=2	ACTBL2	Q562R1	236.641	36	25	920	2	376	42	532710	1.7	25	1		1.03899e+06	462886	312751	541418	849206	6.86486e+07	8.69326e+06		178401		324562	1.13102e+06	1.048e+06	2.70791e+06	1.36645e+07	3.55144e+06		145749	1.16541e+06	1.72756e+06	828907	494187	662392	1.84312e+07	5.8363e+06	2.7169e+06	4.83321e+06
	Other		Actin, gamma-enteric smooth muscle OS=Homo sapiens OX=9606 GN=ACTG2 PE=1 SV=1	ACTG2	P63267	962.977	91	72	2299	4	376	41.9	1263862	3.85	71	3	Met-loss [N-Term]	1.66728e+08	1.815e+08	2.64142e+08	2.25324e+08	1.87545e+08	7.58347e+09	6.52647e+08	1.59527e+08	2.18313e+08	5.41452e+08	3.9291e+08	1.56501e+08	2.94581e+08	4.38987e+08	2.61306e+09	1.83784e+08	3.75216e+08	3.06815e+08	1.92506e+08	2.3624e+08	1.7852e+08	2.90469e+08	5.52679e+08	4.26628e+08	3.58757e+08	1.55109e+08	7.68184e+07
	Other		Alpha-actinin-1 OS=Homo sapiens OX=9606 GN=ACTN1 PE=1 SV=2	ACTN1	P12814	142.431	23	19	113	9	892	103	50873	4.45	19	1		6.54825e+06	8.17509e+06	4.27687e+06	3.64766e+06	1.76363e+06	3.45834e+07	6.85337e+06	3.18352e+06	4.21684e+06	1.16125e+07	1.65437e+07	3.83215e+06	8.33022e+06	1.61467e+07	1.88452e+07	9.76129e+06	1.3622e+07	1.11319e+07	1.89031e+06	2.01532e+06	2.78071e+06	2.16359e+06	4.31931e+06	6.33263e+06	1.11307e+06	6.1035e+06	4.87674e+06
	Other		Alpha-actinin-4 OS=Homo sapiens OX=9606 GN=ACTN4 PE=1 SV=2	ACTN4	O43707	79.136	12	12	66	2	911	104.8	30754	4.45	12	1						308725			4.21752e+06	5.83087e+06		2.42164e+06	286729						789703		549658			228602	135618	632766	1.6407e+06
	Other		Adenosine deaminase OS=Homo sapiens OX=9606 GN=ADA PE=1 SV=3	ADA	P00813	34.761	21	6	12	6	363	40.7	5657		6				3.20837e+06	2.00058e+06		3.50771e+06	38747.8	89792.9	482884	4.4412e+06		3.18973e+06	527845	721413	626362		216568	242072	2.66747e+06	1.25642e+06	602059	598043	2.88908e+06	363838	1.13805e+06	139464	3.20061e+06	362324
	Other		Double-stranded RNA-specific adenosine deaminase OS=Homo sapiens OX=9606 GN=ADAR PE=1 SV=4	ADAR	P55265	5.017	2	2	3	2	1226	136	1010		2						126385			515464	601728	689386										350024			261258	402194	590370	1.48021e+06	482742	272750
	Other		All-trans-retinol dehydrogenase [NAD(+)] ADH1B OS=Homo sapiens OX=9606 GN=ADH1B PE=1 SV=2	ADH1B	P00325	37.229	20	7	33	7	375	39.8	13711		7			7.05547e+06	2.78982e+06	2.75114e+06	1.28408e+06	4.92558e+06	1.59183e+06	8.66921e+06	395755	1.19402e+06	9.45641e+06	8.2095e+06	2.24138e+06	3.72054e+06	1.02141e+07	4.24745e+06	5.55211e+06	6.51413e+06	4.88718e+06	1.71954e+06	1.50288e+06	2.67184e+06		3.71736e+06	4.40865e+06		212437	488254
	Other		Afamin OS=Homo sapiens OX=9606 GN=AFM PE=1 SV=1	AFM	P43652	6.44	5	2	6	2	599	69	1748		2			721700	5.69363e+06	3.31335e+06	142233	220142	71038.8		223141	5.7608e+06	1.79356e+06		289883	153561	2.12046e+06		208652	68855		4.55599e+06	2.50337e+06	158693	375301	2.9648e+06	62321.7	864121	829330
	Other		Alpha-fetoprotein OS=Homo sapiens OX=9606 GN=AFP PE=1 SV=1	AFP	P02771	35.602	11	5	8	5	609	68.6	4145		5			337351	4.66709e+06			235685					430984	910028	2.57617e+06	264673				235504				879038	2.32532e+06	694866	2.2817e+07
	Other		Anterior gradient protein 2 homolog OS=Homo sapiens OX=9606 GN=AGR2 PE=1 SV=1	AGR2	O95994	14.549	17	3	10	3	175	20	4613		3				567193	360664	1.02156e+06	152451	329724	4.6399e+06	585723	554694	2.64596e+06	3.22214e+06		1.01687e+06	2.74836e+06			2.72723e+06		1.52283e+06	211595				518438		336664	1.06898e+06
	Other		Neuroblast differentiation-associated protein AHNAK OS=Homo sapiens OX=9606 GN=AHNAK PE=1 SV=2	AHNAK	Q09666	64.978	8	12	32	11	5890	628.7	14403		12			438468	2.08379e+06		1.74234e+06	1.28625e+06	6.76121e+06	4.37089e+06	1.6776e+06	1.37071e+06	979746	1.40323e+06	1.31367e+06	4.39592e+06	5.42548e+06	3.66454e+06	2.35323e+06	4.94677e+06	6.68717e+06	5.17111e+06	1.40348e+06	1.63465e+06	441441	1.59455e+06	1.61249e+06	4.61385e+06	1.24357e+06	1.03392e+06
	Other		Aflatoxin B1 aldehyde reductase member 3 OS=Homo sapiens OX=9606 GN=AKR7A3 PE=1 SV=2	AKR7A3	Q12802	4.097	0	1	25	1	2813	307.4	9806		1								447996							489384	645870	223865	147368	591337	528837	1.31239e+06		834439		378644	160938			401213
	Other		Serum albumin OS=Homo sapiens OX=9606 GN=ALB PE=1 SV=2	ALB	P02768	706.659	78	67	1386	67	609	69.3	691727	123.85	65	3		7.84302e+07	1.38995e+08	1.38242e+08	1.89699e+08	1.84497e+08	7.58633e+07	2.21139e+08	1.69956e+08	1.60431e+08	8.25459e+07	1.35959e+08	1.34831e+08	2.22331e+08	2.0013e+08	1.84341e+08	1.6035e+08	1.66166e+08	1.36791e+08	1.76912e+08	1.70463e+08	7.56105e+07	9.48541e+07	8.54074e+07	1.10345e+08	3.53284e+07	1.15089e+08	1.12152e+08
	Other		CD166 antigen OS=Homo sapiens OX=9606 GN=ALCAM PE=1 SV=2	ALCAM	Q13740	9.192	4	2	7	2	583	65.1	2002		2				372979	668042		194509	2.4268e+06	607946		1.08291e+06	6.34635e+06	745547			234616	489383	217679	878542	893735		164849	441748	272097			368125	135332	1.78965e+06
	Other		Delta-1-pyrroline-5-carboxylate synthase OS=Homo sapiens OX=9606 GN=ALDH18A1 PE=1 SV=2	ALDH18A1	P54886	13.029	4	3	3	3	795	87.2	1757		3			339379			331215		669202	714485	357410					537983	198500		1.24018e+06		190194	973773	1.70736e+06	637398	386420	204125	2.42242e+06
	Other		Aldehyde dehydrogenase X, mitochondrial OS=Homo sapiens OX=9606 GN=ALDH1B1 PE=1 SV=3	ALDH1B1	P30837	31.174	12	5	6	5	517	57.2	3196		5							98226.5	2.24408e+06	1.84873e+06		213244	31596.7				400004	769672	368554	2.15449e+06
	Other		Aldehyde dehydrogenase family 3 member A2 OS=Homo sapiens OX=9606 GN=ALDH3A2 PE=1 SV=1	ALDH3A2	P51648	87.277	28	11	71	10	485	54.8	35129		11			2.59725e+07	3.36968e+06	2.37391e+06	3.00691e+06	5.6193e+06	1.68211e+06	7.69019e+06	3.37236e+06	1.39337e+06	3.8332e+06	2.64692e+06	5.63418e+06	8.96133e+06	9.16176e+06	6.48747e+06	8.4985e+06	4.29271e+06	6.06343e+06	3.30243e+06	3.33167e+06	1.81939e+06	6.60612e+06	1.7388e+06	2.14714e+06	2.59542e+06	1.11905e+06	3.87308e+06
	Other		Fructose-bisphosphate aldolase A OS=Homo sapiens OX=9606 GN=ALDOA PE=1 SV=2	ALDOA	P04075	12.13	7	2	4	2	364	39.4	1475		2			290832		1.79822e+06		1.22758e+06	186052	1.11014e+06		559509	66795.1	2.12127e+06	482219		5.65293e+06	847977				2.39076e+06	4.08842e+06	821283
	Other		Arachidonate 5-lipoxygenase-activating protein OS=Homo sapiens OX=9606 GN=ALOX5AP PE=1 SV=2	ALOX5AP	P20292	18.32	17	3	24	3	161	18.1	9950		3			1.48995e+06	1.5116e+06	3.74806e+06		2.05938e+06	310412	3.2228e+06	1.55116e+06	3.17599e+06	3.11242e+06	1.68156e+06	4.22663e+06	735263	2.78811e+06	360613	2.9794e+06	1.81658e+06	4.80389e+06	5.91409e+06	4.1363e+06	882873	8.47661e+06	4.24543e+06	2.05552e+06	4.90252e+06	9.77475e+06	8.95253e+06
	Other		Alkaline phosphatase, tissue-nonspecific isozyme OS=Homo sapiens OX=9606 GN=ALPL PE=1 SV=4	ALPL	P05186	14.393	4	2	15	2	524	57.3	8521		2				5.20498e+06	3.47174e+06		5.37698e+06	33241.8	349701		2.07071e+06	869607	6.32152e+06	1.93465e+06	1.36981e+06	1.41752e+06		392874	2.93596e+06	1.17747e+06	3.73767e+06	3.03589e+06	745336	3.6876e+06	2.44159e+06	3.76143e+06
	Other		Acidic leucine-rich nuclear phosphoprotein 32 family member A OS=Homo sapiens OX=9606 GN=ANP32A PE=1 SV=1	ANP32A	P39687	30.922	16	5	93	5	249	28.6	40391		5			5.14975e+06	1.62861e+06	857756	3.1774e+06	1.03701e+07	1.26353e+06	3.69006e+06	5.98832e+06	3.66156e+06	4.78554e+07	4.35547e+06	2.06964e+06	8.1265e+06	6.57496e+06	1.31712e+06	4.35267e+06	8.19792e+06	5.64157e+06	2.49383e+07	3.25566e+06	1.89215e+06	2.19644e+06	2.0614e+06	2.04832e+07	6.9625e+06	6.82085e+06	1.99023e+06
	Other		Acidic leucine-rich nuclear phosphoprotein 32 family member B OS=Homo sapiens OX=9606 GN=ANP32B PE=1 SV=1	ANP32B	Q92688	34.604	18	6	26	6	251	28.8	13368		6			1.21534e+06	669705	314401	958552	3.30073e+06	6.76562e+06	6.26207e+06	1.51035e+06	228854	2.51595e+06			5.49367e+06	5.36011e+06	4.04045e+06	7.14876e+06	8.18553e+06	1.23142e+06	1.09748e+07	2.45709e+06	447193	2.36589e+06	2.66189e+06	6.17702e+06	2.69648e+06	6.17056e+06	2.27714e+06
	Other		Membrane primary amine oxidase OS=Homo sapiens OX=9606 GN=AOC3 PE=1 SV=3	AOC3	Q16853	577.509	54	47	3274	47	763	84.6	1876769	216.33	45	6		8.60424e+08	8.15195e+08	5.52428e+08	5.48121e+08	4.6706e+08	2.95054e+08	5.43174e+08	5.18309e+08	9.75015e+08	4.20889e+08	4.83995e+08	1.07798e+08	5.49561e+08	2.86276e+08	7.60817e+08	7.95211e+08	4.19436e+08	4.70178e+08	3.54459e+08	2.51374e+08	2.93723e+08	7.99792e+07	3.89106e+08	6.30932e+07	1.24771e+08	2.66436e+08	3.19885e+08
	Other		AP-2 complex subunit alpha-1 OS=Homo sapiens OX=9606 GN=AP2A1 PE=1 SV=3	AP2A1	O95782	8.706	4	4	5	4	977	107.5	1341		4			257540	567678	732690	353846	648772		2.24344e+06	378765	385740		697005	897370	867139	306163	434643		624810	338678	200448	698067	1.78386e+06	1.21341e+06	1.33274e+06	1.05093e+06	1.55652e+06	706550	983208
	Other		AP-2 complex subunit beta OS=Homo sapiens OX=9606 GN=AP2B1 PE=1 SV=1	AP2B1	P63010	12.241	2	2	6	2	937	104.5	3162		2				38119.8				47084.8	23323.2	23851.7		60347.6	523656	463355	346519	650086	70296.5	144500		2.819e+06	613269	755007	904783	1.02675e+06	889990	608039	3.44635e+06	1.20398e+06	993484
	Other		Serum amyloid P-component OS=Homo sapiens OX=9606 GN=APCS PE=1 SV=2	APCS	P02743	187.234	43	14	1025	14	223	25.4	574397		14			7.10982e+08	3.51497e+08	1.08601e+08	7.1072e+08	1.60202e+08	1.61176e+08	1.37732e+08	1.01777e+09	6.71005e+08	1.5343e+08	1.66628e+08	1.43769e+08	4.91784e+08	2.47711e+08	1.63646e+08	1.77844e+08	7.62738e+08	3.47522e+08	1.88561e+08	1.38383e+08	3.01059e+07	7.55468e+07	2.30482e+07	1.34562e+07	9.57383e+07	9.77872e+08	7.53594e+07
	Other		Apolipoprotein A-I OS=Homo sapiens OX=9606 GN=APOA1 PE=1 SV=1	APOA1	P02647	11.144	8	2	10	2	267	30.8	4765		2			444945					581820	1.67761e+06	791853	1.02187e+06		344371		324647	252615	445103	608385		818386		120271	346345	500486	547173	530307	781838	309778
	Other		Apolipoprotein A-IV OS=Homo sapiens OX=9606 GN=APOA4 PE=1 SV=3	APOA4	P06727	15.02	7	3	15	3	396	45.4	6684		3			1.38048e+06	599246	859589	5.77927e+06	543038	369800	2.34977e+06		267977	3.93309e+06	3.395e+06		3.37219e+06	1.54627e+07	3.664e+06	1.88165e+06	2.29941e+06	1.97188e+06	1.17901e+06	381446	726942	3.2564e+06	1.63565e+06	646031		494542	104136
	Other		Apolipoprotein D OS=Homo sapiens OX=9606 GN=APOD PE=1 SV=1	APOD	P05090	20.429	19	4	11	4	189	21.3	4469		4			1.87455e+07	7.67283e+07	1.13503e+08	1.31421e+07	3.75645e+07	841845	881389	2.19799e+07	613085	68730.4	9.80726e+07	1.06675e+08	2.24959e+07	4.28841e+07	1.03735e+06	962533	6.16007e+06	1.10465e+07	8.55714e+07	3.65529e+07	3.65589e+07	2.98571e+07	2.86196e+07	4.05144e+06	2.99476e+06	2.91776e+06	2.9104e+07
	Other		Apolipoprotein E OS=Homo sapiens OX=9606 GN=APOE PE=1 SV=1	APOE	P02649	28.722	13	6	19	6	317	36.1	9364		6			693685	6.13672e+06	1.90858e+06	3.36755e+06	564940	945419	1.01039e+06	2.93973e+07	5.44338e+06	3.94477e+06	4.51378e+06		2.50523e+06	1.55831e+06	2.29905e+06	1.65146e+06	153032	3.84872e+06	1.13519e+06	2.48643e+06		1.67443e+06	109898	832103		7.88783e+06
	Other		Beta-2-glycoprotein 1 OS=Homo sapiens OX=9606 GN=APOH PE=1 SV=3	APOH	P02749	135.038	37	13	137	13	345	38.3	61690	2.41	13	1		2.20045e+06	2.3738e+06	1.05667e+06	7.30876e+06	1.23847e+07	7.72044e+06	3.89032e+07	3.62081e+06	4.28931e+06	1.18262e+07	9.6815e+06	1.59781e+07	5.7064e+06	1.77599e+07	1.04011e+07	3.35734e+07	1.33367e+07	1.82797e+07	1.13462e+07	3.47207e+07	7.83333e+06	8.92294e+06	5.52876e+06	5.07359e+07	1.77827e+06	8.69417e+06	1.43738e+07
	Other		Adenine phosphoribosyltransferase OS=Homo sapiens OX=9606 GN=APRT PE=1 SV=2	APRT	P07741	5.493	12	2	4	2	180	19.6	815	2.5	1	1	Met-loss+Acetyl [N-Term]	356316			150904	6.55568e+06	1.85346e+06		1.57609e+06	867837	3.05256e+06	4.00304e+06	1.34063e+06	4.09492e+06	8.19714e+06	6.28802e+06	935330	3.37541e+06	760928	1.55318e+07		8.02848e+06	174521	7.46145e+06	3.1302e+06		933045	1.0963e+06
	Other		Aquaporin-1 OS=Homo sapiens OX=9606 GN=AQP1 PE=1 SV=3	AQP1	P29972	19.016	16	3	7	3	269	28.5	3964		3						85265.6		1.19835e+06	40159.2			37981.4	48593.3		46843.4	421912	3.31346e+06	117646								138016
	Other		Coatomer subunit delta OS=Homo sapiens OX=9606 GN=ARCN1 PE=1 SV=1	ARCN1	P48444	8.687	3	2	5	2	511	57.2	1745		2			2.68143e+06			88743.6		289533				2.32052e+06									2.79383e+06	3.65859e+06	8.97434e+06	6.84443e+06	6.65281e+06	6.8909e+06	1.19235e+07		3.55306e+06
	Other		ADP-ribosylation factor 3 OS=Homo sapiens OX=9606 GN=ARF3 PE=1 SV=2	ARF3	P61204	37.243	24	6	25	2	181	20.6	12241		6			3.03781e+07	195545	1.29228e+06	853640	472522	1.36347e+06	2.39716e+06	790155	3.36507e+06	760900	1.20482e+06	1.01005e+06	935690	2.39695e+06	1.77603e+06	4.27597e+06	2.13402e+06	994681	2.72813e+06	3.30175e+06		463722	792109	1.00863e+07	763161	809892	1.95993e+06
	Other		ADP-ribosylation factor 4 OS=Homo sapiens OX=9606 GN=ARF4 PE=1 SV=3	ARF4	P18085	39.425	27	6	55	2	180	20.5	28403		6				1.0245e+06	1.26053e+06	993563	3.26952e+06	448157	9.45391e+06		1.09268e+06	4.19218e+06	1.56849e+06	1.12556e+06	3.22891e+06	5.49545e+06	946833	2.11437e+06	3.52097e+06	624324	3.71426e+06	7.21852e+06	1.72235e+06	3.53851e+06	2.35368e+06	1.29903e+07	833422	1.55287e+06	2.31059e+06
	Other		Manganese-transporting ATPase 13A1 OS=Homo sapiens OX=9606 GN=ATP13A1 PE=1 SV=2	ATP13A1	Q9HD20	7.529	2	2	2	2	1204	132.9	817		2							1.30148e+06			563270				224834		462791					401409	362460	893751		101675	3.43281e+06
	Other		Sodium/potassium-transporting ATPase subunit alpha-1 OS=Homo sapiens OX=9606 GN=ATP1A1 PE=1 SV=1	ATP1A1	P05023	206.052	28	25	206	21	1023	112.8	83709		25			5.56793e+06	2.60369e+07	1.13912e+07	1.03477e+07	2.92592e+07	1.69767e+07	7.23477e+07	1.86606e+07	2.30585e+07	7.26164e+07	6.36806e+07	1.70325e+07	3.44467e+07	5.30295e+07	9.87886e+06	2.20014e+07	5.37855e+07	2.45367e+07	2.41684e+07	5.11581e+07	3.73339e+07	2.49623e+07	2.8476e+07	1.58869e+07	1.3687e+07	8.60355e+06	1.17759e+07
	Other		Sodium/potassium-transporting ATPase subunit beta-1 OS=Homo sapiens OX=9606 GN=ATP1B1 PE=1 SV=1	ATP1B1	P05026	17.741	12	3	21	3	303	35	6708		3			1.82369e+06	404804	1.52305e+06		1.05645e+06	58248.7	1.27932e+07		151204	2.49595e+07	2.57971e+06		136676	3.14456e+06	4.43592e+06		730966		1.80296e+06	1.83038e+06		97876.7	935266	116274	1.93497e+06	1.23734e+06	6399.4
	Other		Sodium/potassium-transporting ATPase subunit beta-3 OS=Homo sapiens OX=9606 GN=ATP1B3 PE=1 SV=1	ATP1B3	P54709	14.215	9	2	4	2	279	31.5	1878		2					192637	86630.5	592333	4.28763e+06	1.29369e+06	209118	11528.4	349392		998029				442413		3.05493e+06	4.57517e+06	576114	734270		171918	4.02605e+06		158863
	Other		Sarcoplasmic/endoplasmic reticulum calcium ATPase 2 OS=Homo sapiens OX=9606 GN=ATP2A2 PE=1 SV=1	ATP2A2	P16615	86.958	14	12	63	12	1042	114.7	30868		12			1.88894e+07	3.23808e+06	5.79184e+06	1.75764e+07	4.37252e+06	4.25985e+06	9.29312e+06	182982	7.01163e+06	8.84817e+06	5.139e+06	1.18704e+07	6.82879e+06	1.04598e+07	1.51447e+06	1.21932e+07	1.1445e+07	7.89423e+06	6.68087e+06	1.28841e+07	1.02899e+07	5.85652e+06	3.21333e+06	3.3084e+07	1.82955e+06	1.07262e+07	9.38501e+06
	Other		Plasma membrane calcium-transporting ATPase 4 OS=Homo sapiens OX=9606 GN=ATP2B4 PE=1 SV=2	ATP2B4	P23634	29.981	7	6	9	6	1241	137.8	3552		6			2.13391e+06	8.84217e+06	169543		378404	4.39064e+06	888258		1.7273e+07				3.3219e+06		2.66035e+06	210427	1.52664e+06	1.46305e+06					286201
	Other		Potassium-transporting ATPase alpha chain 1 OS=Homo sapiens OX=9606 GN=ATP4A PE=2 SV=5	ATP4A	P20648	87.996	14	12	78	8	1035	114	28677	16.31	10	2		3.41018e+06	6.91983e+06	1.35928e+07	1.16586e+07	5.23987e+06	102862	3.63981e+06	1.43308e+06	9.64834e+06		874142	945116	1.41662e+06	4.17103e+06	699151	5.95271e+06	885449	2.07586e+06	1.20623e+07		967653	3.47967e+06	1.09893e+07	488771	918848	739899	1.59484e+06
	Other		ATP synthase subunit alpha, mitochondrial OS=Homo sapiens OX=9606 GN=ATP5F1A PE=1 SV=1	ATP5A1	P25705	83.049	24	12	65	12	553	59.7	31355		12			2.51041e+06	3.59322e+06	4.02279e+06	2.2527e+06	823118	1.73172e+07	1.02698e+07	4.06271e+06	1.44859e+06	3.87048e+06	1.55476e+06	2.53799e+06	1.72721e+06	5.44581e+06	1.06933e+07	6.86576e+06	7.5507e+06	690425	2.19646e+06	4.51262e+06	3.07714e+06	491521	1.58963e+06	1.14105e+07	3.51218e+06	241693
	Other		ATP synthase subunit beta, mitochondrial OS=Homo sapiens OX=9606 GN=ATP5F1B PE=1 SV=3	ATP5B	P06576	62.227	21	8	110	8	529	56.5	32042		8			3.39936e+08	4.97752e+08	6.77328e+08	3.06315e+08	4.532e+08	1.12673e+07	5.15592e+07	4.92633e+08	2.56242e+08	7.21106e+07	4.56373e+08	3.84008e+08	5.84719e+08	4.10097e+08	1.92151e+07	6.32997e+07	4.29936e+08	2.5453e+08	2.47804e+08	3.54735e+08	5.62525e+08	4.47794e+08	3.37365e+08	6.46696e+06	7.22657e+07	1.57182e+08	1.47228e+08
	Other		ATP synthase subunit gamma, mitochondrial OS=Homo sapiens OX=9606 GN=ATP5F1C PE=1 SV=1	ATP5C1	P36542	16.56	11	3	3	3	298	33	1696		3			591808	448816								284994	465597							106092					251660	701919			766855
	Other		ATP synthase F(0) complex subunit B1, mitochondrial OS=Homo sapiens OX=9606 GN=ATP5PB PE=1 SV=2	ATP5F1	P24539	7.212	9	2	2	2	256	28.9	1055		2						185965		64636.4	440858											36623.9		277728							273928
	Other		ATP synthase subunit g, mitochondrial OS=Homo sapiens OX=9606 GN=ATP5MG PE=1 SV=3	ATP5L	O75964	23.017	42	4	44	4	103	11.4	19460		4			1.5831e+06	937979	2.00458e+06	1.38473e+06	2.56664e+06	686973	2.37973e+06	104687	3.84053e+06	6.48018e+06	909344	1.33082e+06	2.08725e+06	4.1984e+06	1.31812e+06	2.39437e+06	2.58295e+06	575131	649509	1.8882e+06	2.44108e+06	502104	2.92091e+06	3.45929e+06	128071	155758	626545
	Other		ATP synthase subunit a OS=Homo sapiens OX=9606 GN=MT-ATP6 PE=1 SV=1	ATP6	P00846	17.202	10	2	37	2	226	24.8	18396		2				291406	1.97517e+06	5.18882e+06		7272925	1.36165e+07	11399.4	793055		286335	4.71474e+06	3.96363e+06	1.14695e+07	9.99285e+06	1.83557e+07		317504	5.99948e+06	399752	5.32222e+06	1.64167e+06	3.60108e+06	1.21494e+07	3.95393e+06	141804
	Other		V-type proton ATPase subunit d 1 OS=Homo sapiens OX=9606 GN=ATP6V0D1 PE=1 SV=1	ATP6V0D1	P61421	7.045	8	3	3	3	351	40.3	1189		3								2.41683e+06	1.45927e+06						495294	764486					239283	217263		349228	371219	2.33846e+06	287992
	Other		Azurocidin OS=Homo sapiens OX=9606 GN=AZU1 PE=1 SV=3	AZU1	P20160	72.908	40	10	78	10	251	26.9	42934		10			1.32343e+06	7.36503e+06	920551	1.2894e+06	1.11281e+07	1.59008e+07	1.64042e+07	9.77099e+06	1.07978e+07	887204	6.7401e+06	2.77764e+07	1.03061e+07	1.28034e+07	3.58603e+07	2.24199e+06	4.37765e+06	1.70107e+07	4.24141e+07	9.08156e+06	1.42436e+06	2.53735e+07	6.06235e+06	3.00845e+07	2.21882e+08	6.31929e+07	9.0177e+07
	Other		Beta-2-microglobulin OS=Homo sapiens OX=9606 GN=B2M PE=1 SV=1	B2M	P61769	89.59	55	11	148	11	119	13.7	82051		11			2.96975e+06	5.97887e+06	2.33795e+07	8.09072e+06	5.98422e+07	367061	1.30243e+07	3.31219e+07	1.9856e+07	370132	7.10786e+06	7.43767e+06	1.1921e+07	1.35132e+07	1.35322e+07	3.30826e+07	1.80507e+07	1.06427e+07	4.05441e+07	1.24659e+07	3.39673e+06	6.4796e+07	1.36561e+07	7.66935e+07	1.44129e+07	7.64876e+07	2.90724e+07
	Other		Brain acid soluble protein 1 OS=Homo sapiens OX=9606 GN=BASP1 PE=1 SV=2	BASP1	P80723	10.212	33	3	10	3	227	22.7	1665		3			2.66203e+06	1.60825e+06	2.07575e+06	2.95133e+06	1.82477e+06	126102	689137	3.85989e+06	3.39165e+06		607740	1.95274e+06	5.20309e+06	2.84269e+06		841086	2.034e+06	1.32433e+06	2.76966e+06		1.34598e+06			399556	1.44583e+06	3.42989e+06	1.81822e+06
	Other		Bone marrow stromal antigen 2 OS=Homo sapiens OX=9606 GN=BST2 PE=1 SV=1	BST2	Q10589	15.193	13	2	20	2	180	19.8	11991		2				6.90645e+06	9.68981e+06	8.43023e+06	8.27536e+06	920850	5.76362e+06	4.66425e+06	8.03897e+06	30351.8	7.02139e+06	1.27615e+06	7.25977e+06	5.04801e+06	4.09986e+06	9.42138e+06	7.67121e+06	5.38578e+06	1.29519e+07	1.17105e+07	1.34107e+06	1.37993e+07	1.92989e+06	1.26772e+07	3.73313e+06	9.0797e+06	8.15219e+06
	Other		Basic leucine zipper and W2 domain-containing protein 1 OS=Homo sapiens OX=9606 GN=BZW1 PE=1 SV=1	BZW1	Q7L1Q6	21.676	9	2	5	2	419	48	2811		2									350864	181603					97695.3		604132	372794		231731				91490.2		4.18793e+06	150343		270934
	Other		ATP synthase subunit ATP5MPL, mitochondrial OS=Homo sapiens OX=9606 GN=ATP5MPL PE=1 SV=1	C14orf2	P56378	11.888	28	2	5	2	58	6.7	2828		2				760397	208355		502818	1.0475e+06		225430	677824	1.25855e+06			759332		143591		3.71052e+06							77053.2		226291
	Other		Complement C3 OS=Homo sapiens OX=9606 GN=C3 PE=1 SV=2	C3	P01024	166.692	14	24	370	24	1663	187	174721	2.23	24	1		3.99597e+07	3.82072e+07	2.59768e+07	3.52167e+07	4.62109e+07	2.38032e+07	3.04592e+07	4.73783e+07	5.72053e+07	9.0706e+07	7.55632e+07	5.04907e+07	3.86167e+07	3.60358e+07	2.50713e+07	2.94307e+07	9.82102e+07	4.64986e+07	4.08863e+07	4.77324e+07	3.5217e+07	2.45485e+07	1.35245e+07	2.28829e+07	9.09925e+07	6.87038e+07	5.90068e+07
	Other		Complement C4-A OS=Homo sapiens OX=9606 GN=C4A PE=1 SV=2	C4A; C4B	P0C0L4	78.889	7	11	83	2	1744	192.7	32860		11			6.88815e+06	7.11402e+06	3.23558e+06	2.00235e+06	3.57726e+06	7.66517e+06	8.77664e+06	4.89846e+06	2.29395e+07	4.74869e+07	9.7325e+06	7.11301e+06	3.0063e+06	6.95005e+06	9.08253e+06	3.57378e+06	3.6547e+07	1.27379e+07	4.98621e+06	9.00713e+06	5.22865e+06	1.95133e+06	1.11743e+07	3.43268e+06	2.14862e+06	8.21147e+06	5.22579e+06
	Other		Complement C4-B OS=Homo sapiens OX=9606 GN=C4B PE=1 SV=2	C4B; C4B_2; LOC100293534	P0C0L5	72.036	7	11	77	2	1744	192.6	30769		11			1.28781e+06		175458	182595		72932	152750	106317	469384		208279	177770	42820.9		172257		187870	105947	147503	366764		86844.9	138677			18265
	Other		C4b-binding protein alpha chain OS=Homo sapiens OX=9606 GN=C4BPA PE=1 SV=2	C4BPA	P04003	32.027	14	7	32	7	597	67	13488		7			2.27279e+06	820616	1.82105e+06	206330	553778	271018	1.63619e+06	687942	111803	2.15435e+06	1.35017e+06	1.46982e+06	2.09237e+06	1.03198e+06		1.75718e+06	2.49651e+06	3.70606e+06	743466	435054	498983	3.3455e+06	731758	646840	318763	1.6038e+06	335365
	Other		Complement C5 OS=Homo sapiens OX=9606 GN=C5 PE=1 SV=4	C5	P01031	3.852	1	2	2	2	1676	188.2	452		2										74958					60263.6				32062
	Other		Complement component C6 OS=Homo sapiens OX=9606 GN=C6 PE=1 SV=3	C6	P13671	42.599	6	4	20	4	934	104.7	11823		4			3.83838e+06	1.523e+06	2.19233e+06		793400	217841	366989	995889	1.46074e+06		1.5334e+06	262936	429515	312172	47676.5	512449	582595	1.44258e+06	322384	365654		430919	929811	69723.3	669468	5.61877e+06	550794
	Other		Complement component C7 OS=Homo sapiens OX=9606 GN=C7 PE=1 SV=2	C7	P10643	43.295	14	8	17	7	843	93.5	6773	0	7	1		1.36546e+06	1.90875e+06	471603	645563	435708	452582	2.24058e+06	414414	292160	536538			913403	1.10189e+06	263229		403948	1.26574e+06	1.40814e+06	270502	400068	261990	1.61983e+06	393438	243028	4.18389e+06	2.44919e+06
	Other		Complement component C8 alpha chain OS=Homo sapiens OX=9606 GN=C8A PE=1 SV=2	C8A	P07357	20.009	9	3	5	3	584	65.1	2211	3.53	2	1			1.41412e+06	1.12703e+06	1.69068e+06	3.00983e+06	59621.4	8.52893e+06		918083		2.31576e+06	1.40989e+06	341046	2.25557e+06	355526	946811	4.29017e+06	4.1389e+06	2.55584e+06	957283	1.14659e+06		1.60876e+06	2.1176e+06	2.07686e+06	5.60311e+06	3.63859e+06
	Other		Complement component C8 beta chain OS=Homo sapiens OX=9606 GN=C8B PE=1 SV=3	C8B	P07358	35.288	8	4	14	4	591	67	6752	6.46	3	1		747521	3.03917e+06	5.5242e+06	54723.7	1.68433e+06	534589	3.97846e+06	46635.1	3.34846e+06	261487	1.48221e+07		4.94939e+06	1.9829e+06	6.1805e+06	6.33429e+06	4.03551e+06	1.27035e+07	705734	1.36054e+06		1.06481e+06	4.54898e+06	1.30723e+06	973288	637830	1.09678e+06
	Other		Complement component C8 gamma chain OS=Homo sapiens OX=9606 GN=C8G PE=1 SV=3	C8G	P07360	28.65	13	2	9	2	202	22.3	4631		2			8.52063e+08	1.44419e+06	2.07687e+06	386780	2.25499e+06	3.73845e+07	2.90388e+06	151763	632608	4.38345e+06	2.27156e+06	612328	998170	1.62375e+06	895072	3.46392e+06	3.93772e+06	517901	1.78065e+06	3.02824e+06	354495	338404	944440	1.13459e+07		1.97936e+06	4.79676e+06
	Other		Complement component C9 OS=Homo sapiens OX=9606 GN=C9 PE=1 SV=2	C9	P02748	249.605	50	24	296	23	559	63.1	153499	11.51	24	3		3.81912e+07	7.43654e+07	4.71981e+07	2.95932e+07	6.153e+07	7.91668e+06	3.93858e+07	7.06147e+07	9.80745e+07	1.17815e+07	1.1013e+08	2.70777e+07	1.75703e+07	2.05788e+07	1.58558e+07	3.19187e+07	3.10767e+07	7.62401e+07	6.77807e+07	5.15737e+07	8.30687e+06	3.55543e+07	1.58255e+07	2.02176e+07	2.89193e+07	1.54012e+08	9.72513e+07
	Other		Carbonic anhydrase 2 OS=Homo sapiens OX=9606 GN=CA2 PE=1 SV=2	CA2	P00918	10.146	10	2	3	2	260	29.2	838		2				376815	859267					114008				1.47767e+06	272500	773035	54489.1		401880	53334.1								299293
	Other		Carbonic anhydrase 4 OS=Homo sapiens OX=9606 GN=CA4 PE=1 SV=2	CA4	P22748	76.175	28	9	90	9	312	35	39147	11.73	8	1		5.24275e+07	2.96713e+07	7.72018e+06	6.64772e+06	1.22619e+07	523598	9.63346e+06	1.30419e+07	3.93171e+07	1.59532e+07	6.48663e+06	9.96887e+06	1.64662e+07	8.79919e+06	637102	1.24203e+07	3.9296e+06	1.49683e+07	5.06169e+06	1.55444e+06	1.43297e+06	2.86856e+06	3.03369e+06	783233	580588	8.54048e+06	4.32564e+06
	Other		Carbonic anhydrase 9 OS=Homo sapiens OX=9606 GN=CA9 PE=1 SV=2	CA9	Q16790	9.025	7	2	3	2	459	49.7	946	3.11	1	1			2.36825e+06	2.45841e+06			89374.6													386074				356390		5.91905e+06
	Other		CAD protein OS=Homo sapiens OX=9606 GN=CAD PE=1 SV=3	CAD	P27708	10.974	1	2	5	2	2225	242.8	3428		2						435384			306607				705415				21808.5	210279				144749			167752	1.37458e+06
	Other		Caldesmon OS=Homo sapiens OX=9606 GN=CALD1 PE=1 SV=3	CALD1	Q05682	115.954	22	17	39	17	793	93.2	18288		17			531684	258430	297996	3.06206e+07	1.60546e+06	2.28432e+07	2.00891e+06	879194	5.62277e+06	1.69296e+06	1.02214e+06	6.27638e+06	5.07202e+06	2.8403e+06	4.99905e+06	4.0727e+06	7.83228e+06	554730	3.19001e+06	1.44551e+06	2.83157e+06		1.26101e+06	6.20301e+06	1.58586e+06	728519	7.48052e+06
	Other		Calmodulin-like protein 5 OS=Homo sapiens OX=9606 GN=CALML5 PE=1 SV=2	CALML5	Q9NZT1	6.921	16	2	2	2	146	15.9	595	3.39	1	1	Met-loss+Acetyl [N-Term]			656703	754543		193848	289680	2.57237e+06			695842			390651	241573	381280	798123	805872	996187							904625	990531
	Other		Calcium/calmodulin-dependent protein kinase type II subunit alpha OS=Homo sapiens OX=9606 GN=CAMK2A PE=1 SV=2	CAMK2A	Q9UQM7	27.231	11	5	23	2	478	54.1	8050		5			3.18273e+06	301431		1.61105e+06	752843	1.8117e+07	3.64253e+06	3.85924e+06	9.73855e+06	6.19385e+06	207819	1.79984e+06	1.72696e+06	3.98973e+06	5.68317e+06		3.13065e+06	1.707e+07	3.03665e+06	1.68872e+06		2.8159e+06	375768	307526	2.36311e+06	8.05716e+06	2.68213e+07
	Other		Calcium/calmodulin-dependent protein kinase type II subunit delta OS=Homo sapiens OX=9606 GN=CAMK2D PE=1 SV=3	CAMK2D	Q13557	37.197	12	5	8	2	499	56.3	3877		5								1.28893e+06	430628	5.56811e+06	1.47809e+07	72793.2				839577	859806	341099	4.00153e+06	1.18662e+07	381395					459937	941569	5.6746e+06	1.13919e+06
	Other		Calnexin OS=Homo sapiens OX=9606 GN=CANX PE=1 SV=2	CANX	P27824	25.187	6	2	4	2	592	67.5	2487		2				1.12098e+06	697348				174773				992949									3.53719e+06		3.82329e+06	548785
	Other		Adenylyl cyclase-associated protein 1 OS=Homo sapiens OX=9606 GN=CAP1 PE=1 SV=5	CAP1	Q01518	4.133	4	2	5	2	475	51.9	1215		2			1.96375e+06	317983	2.54343e+06	367265	278906	1.03375e+06	255747	1.3567e+06	2.2368e+06	1.08998e+06	2.81259e+06	81364.9	868885	830814	1.4096e+06		717138	906797	78370.5		140582	500121		106550	945838	436611	337801
	Other		Calpain-1 catalytic subunit OS=Homo sapiens OX=9606 GN=CAPN1 PE=1 SV=1	CAPN1	P07384	8.108	3	2	2	2	714	81.8	856		2			4.24217e+06					187495										129798
	Other		F-actin-capping protein subunit beta OS=Homo sapiens OX=9606 GN=CAPZB PE=1 SV=4	CAPZB	P47756	10.968	9	2	2	2	277	31.3	610		2			4.69559e+06				99531	1.02534e+06		113132	91968		3.53672e+06				279606	717764		253371					1.26107e+06
	Other		Caveolin-1 OS=Homo sapiens OX=9606 GN=CAV1 PE=1 SV=4	CAV1	Q03135	157.284	49	13	490	13	178	20.5	263493		13			1.01635e+08	2.12468e+08	2.31798e+08	1.80574e+08	1.53564e+08	1.71987e+08	2.23687e+08	1.05794e+08	1.77918e+08	4.81247e+07	2.78061e+08	5.71141e+07	2.0193e+08	1.50978e+08	3.03352e+08	2.63312e+08	1.75571e+08	1.14229e+08	1.16787e+08	1.28133e+08	6.06413e+07	5.82355e+07	1.815e+08	1.85408e+08	6.56142e+07	1.17203e+08	9.75513e+07
	Other		T-complex protein 1 subunit gamma OS=Homo sapiens OX=9606 GN=CCT3 PE=1 SV=4	CCT3	P49368	9.287	4	2	2	2	545	60.5	620		2								2.01916e+06					245146			183855	1.33886e+06									787273
	Other		T-complex protein 1 subunit delta OS=Homo sapiens OX=9606 GN=CCT4 PE=1 SV=4	CCT4	P50991	4.64	4	2	3	2	539	57.9	1054		2			384091			174914		529477	345626			303611			265298		275616	959225	605372						291002	1.23178e+06
	Other		T-complex protein 1 subunit zeta OS=Homo sapiens OX=9606 GN=CCT6A PE=1 SV=3	CCT6A	P40227	15.989	8	3	4	3	531	58	1689		3						230794		676035	270593		397766						135448			416153		106020			140102	1.354e+06		99792.5
	Other		CD151 antigen OS=Homo sapiens OX=9606 GN=CD151 PE=1 SV=3	CD151	P48509	20.518	12	4	107	4	253	28.3	57550		4			1.22778e+08	3.86843e+07	5.64216e+07	1.25801e+08	1.05863e+08	3.36727e+07	2.07598e+07	7.11234e+06	9.42759e+06	2.05307e+07	4.11886e+07	8.65466e+07	6.30715e+07	1.1268e+08	1.05244e+07	1.30465e+07	1.09931e+07	7.43304e+06	7.15265e+07	1.18877e+08	8.01215e+07	2.79796e+07	3.66186e+07	4.96017e+06	8.00623e+06	9.39679e+06	6.80565e+06
	Other		CD276 antigen OS=Homo sapiens OX=9606 GN=CD276 PE=1 SV=1	CD276	Q5ZPR3	22.154	15	3	14	3	534	57.2	5675		3				2.83088e+06	429941	530583	1.60463e+07	1.28318e+06	238269	546906	801264		544039		246353		79280.2	588255	271886			449207	1.26956e+06	1.48217e+06	161214	2.88032e+06	3.45195e+06	7.54419e+06	4.86028e+06
	Other		Platelet glycoprotein 4 OS=Homo sapiens OX=9606 GN=CD36 PE=1 SV=2	CD36	P16671	152.663	29	15	319	15	472	53	143430	12.59	15	2		3.95456e+07	4.10753e+07	2.18625e+07	1.8109e+07	4.52453e+07	212698	5.64745e+06	3.75252e+07	6.92904e+07	1.1958e+07	3.60242e+07	1.14525e+07	1.77416e+07	1.93982e+07	907717	2.54307e+07	5.11615e+06	4.68606e+07	1.09567e+07	9.42996e+06	4.64465e+06	7.96483e+06	2.00632e+06	6.38008e+06	8.95778e+06	4.15168e+07	4.35097e+07
	Other		Tumor necrosis factor receptor superfamily member 5 OS=Homo sapiens OX=9606 GN=CD40 PE=1 SV=1	CD40	P25942	11.127	13	3	11	3	277	30.6	4574	2.31	2	1		1.41084e+06	3.25516e+06	3.8696e+06	1.02898e+06	9.51796e+06	837225	2.9803e+06	3.00317e+06	4.00165e+06		7.59548e+06	3.70588e+06	2.77287e+06	2.22551e+06	5.64002e+06	3.31535e+06	6.68922e+06	5.00273e+06	3.83794e+06	3.88041e+06	1.86486e+06	1.00368e+07	9.03311e+06	6.04575e+06	2.97025e+07	1.01949e+07	5.63234e+06
	Other		CD44 antigen OS=Homo sapiens OX=9606 GN=CD44 PE=1 SV=3	CD44	P16070	9.617	2	2	70	2	742	81.5	26303		2			3.05547e+06	9.50393e+06	3.2033e+06	3.65685e+06	6.45058e+06	884913	2.99137e+06	3.15473e+06	7.09744e+06	6.27757e+06	7.6558e+06	4.26122e+06	4.39851e+06	2.08459e+06	893063	5.36852e+06	9.74321e+06	3.80931e+06	5.6691e+06	8.16313e+06	1.40136e+06	8.38185e+06	4.19696e+06	3.78661e+06	4.27826e+06	1.05047e+07	1.7727e+07
	Other		Leukocyte surface antigen CD47 OS=Homo sapiens OX=9606 GN=CD47 PE=1 SV=1	CD47	Q08722	23.815	9	3	338	3	323	35.2	216434		3			7.30265e+07	1.00108e+08	6.5842e+07	4.67912e+07	1.09578e+08	1.36725e+07	4.94392e+07	5.10482e+07	2.20013e+08	3.25988e+07	8.93844e+07	5.76481e+07	6.08937e+07	6.23046e+07	2.80961e+07	5.95936e+07	4.06844e+07	1.65764e+08	8.64219e+07	7.24097e+07	3.01582e+07	5.8364e+07	3.6188e+07	4.47711e+07	4.44441e+07	1.00456e+08	9.08992e+07
	Other		Leukocyte surface antigen CD53 OS=Homo sapiens OX=9606 GN=CD53 PE=1 SV=1	CD53	P19397	7.292	7	2	2	2	219	24.3	1027		2				598304	653803	363094	606179	13957.3	13807.3	764956	572400		609718	537959		551937					125060		52500.2		21965.4	680349			24275
	Other		Complement decay-accelerating factor OS=Homo sapiens OX=9606 GN=CD55 PE=1 SV=4	CD55	P08174	85.207	36	13	149	13	381	41.4	70331	3.1	12	1		3.49646e+07	4.3225e+06	2.84948e+06	3.1778e+06	4.57379e+06	2.409e+06	1.36287e+07	686802	1.31113e+06	2.06599e+07	4.12831e+06	9.62756e+06	9.40396e+06	1.94392e+07	2.316e+07	3.56286e+06	3.9607e+06	4.26905e+06	1.91261e+07	3.45709e+07	2.30402e+07	1.57034e+07	7.17115e+06	1.13626e+07	4.7152e+06	1.11811e+07	9.42786e+07
	Other		CD59 glycoprotein OS=Homo sapiens OX=9606 GN=CD59 PE=1 SV=1	CD59	P13987	88.638	48	6	296	6	128	14.2	163899	0	6	1		3.46949e+07	2.42738e+08	1.48191e+08	9.02129e+07	1.32716e+08	1.28515e+06	8.29559e+07	1.03629e+08	3.1458e+08	2.17169e+07	1.30454e+08	4.74452e+07	4.46529e+07	7.38825e+07	1.7559e+07	1.16615e+08	5.26857e+07	2.08811e+08	1.0819e+08	1.77936e+08	1.59433e+07	1.29675e+08	5.44597e+07	6.23862e+07	1.99544e+07	1.50054e+08	2.95852e+08
	Other		CD63 antigen OS=Homo sapiens OX=9606 GN=CD63 PE=1 SV=2	CD63	P08962	25.011	17	3	13	3	238	25.6	5284		3			2.33962e+06	4.66634e+06	4.08876e+06	2.19131e+06	7.71597e+06	277406	292784	4.86559e+06	420503	19220.1	148505	126831				2.97993e+06	903697	929193	247809		309915	2.71357e+06	2.12746e+06	2.96057e+06	2.73355e+06	768255	4.27959e+06
	Other		HLA class II histocompatibility antigen gamma chain OS=Homo sapiens OX=9606 GN=CD74 PE=1 SV=3	CD74	P04233	19.8	10	4	13	4	296	33.5	4608		4				412636			1.29606e+06					4.53694e+06	246956		270714	969443		445793	286945	709562	389827	2.77842e+06	468937	1.26159e+06		267725	873728	1.28472e+06	2.85708e+06
	Other		CD81 antigen OS=Homo sapiens OX=9606 GN=CD81 PE=1 SV=1	CD81	P60033	78.253	28	4	93	4	236	25.8	46049		4			2.38715e+06	1.39393e+06	3.11244e+06	5.87064e+06	2.30416e+07	1.58606e+07	1.49452e+07	3.41931e+06	6.62214e+06	3.28668e+07	3.31196e+06	4.75309e+06	3.70247e+06	2.00307e+07	2.29947e+07	2.32619e+07	1.5764e+07	3.33524e+06	1.32319e+07	8.30188e+06	6.45731e+06	208934	3.98305e+06	7.27085e+06	2.38371e+06	1.76532e+06	3.12029e+06
	Other		CD9 antigen OS=Homo sapiens OX=9606 GN=CD9 PE=1 SV=4	CD9	P21926	123.967	29	12	134	12	228	25.4	68196		12			9.10644e+06	4.05147e+07	4.9692e+07	5.89136e+07	3.00712e+07	7.45579e+06	1.7611e+07	8.30981e+06	1.80365e+07	1.79713e+07	1.68333e+07	2.80728e+07	3.11133e+07	5.42815e+07	7.17581e+06	1.31713e+07	1.37305e+07	1.18573e+07	1.83551e+07	2.61552e+07	9.8086e+06	5.09807e+06	2.03532e+07	7.64305e+06	2.13274e+07	1.4661e+07	6.30844e+06
	Other		Cell division control protein 42 homolog OS=Homo sapiens OX=9606 GN=CDC42 PE=1 SV=2	CDC42	P60953	60.496	38	7	73	6	191	21.2	36037		7			6.54601e+06	1.51479e+07	6.78893e+06	6.86139e+06	9.07672e+06	2.16107e+06	1.01294e+07	9.26985e+06	1.24787e+07	7.90672e+06	7.36856e+06	9.74336e+06	1.02272e+07	1.30943e+07	3.16049e+06	8.05375e+06	1.65203e+07	1.42955e+07	8.86142e+06	6.13329e+06	1.59641e+07	8.0165e+06	1.15885e+07	8.72357e+06	3.10183e+06	1.39338e+07	8.77349e+06
	Other		Cadherin-1 OS=Homo sapiens OX=9606 GN=CDH1 PE=1 SV=3	CDH1	P12830	17.743	3	3	36	3	882	97.4	15733		3			7.62493e+06	4.8157e+06	188737	6.83575e+06	4.61685e+06	65688.5	1.85643e+06	4.64821e+06	5.85178e+06	2.69204e+06	6.61978e+06	1.38343e+06	4.82628e+06	4.0235e+06	655574	1.90407e+06	1.32758e+07	5.18576e+06	4.46414e+06	4.19475e+06	1.9185e+06	1.01926e+06	1.00708e+06	479381	1.34585e+06	4.06647e+06	1.5057e+06
	Other		Carcinoembryonic antigen-related cell adhesion molecule 1 OS=Homo sapiens OX=9606 GN=CEACAM1 PE=1 SV=2	CEACAM1	P13688	43.263	13	6	24	4	526	57.5	13078		6			1.14695e+06		2.15933e+06					106180	784173	724938					187851	811508	254846	1.38313e+06	1.10945e+06		203241	5.20399e+06		1.76035e+06	3.40615e+06	3.48665e+06	4.74667e+06
	Other		Carcinoembryonic antigen-related cell adhesion molecule 5 OS=Homo sapiens OX=9606 GN=CEACAM5 PE=1 SV=3	CEACAM5	P06731	62.818	13	8	82	6	702	76.7	28700	5.3	7	1		9.5558e+07	8.57122e+06	1.30318e+07	1.6334e+07	4.50572e+06	2.25359e+06	1.48621e+06	1.46605e+07	4.61172e+06	1.66274e+08	3.67269e+06	1.04733e+08	1.00913e+07	1.46347e+07	9.30822e+06	2.59739e+07	6.12083e+06	5.18145e+06	2.01319e+07	3.806e+06	1.25644e+07	1.63542e+07	1.08489e+07	2.141e+07	1.72801e+07	4.68955e+07	3.2208e+07
	Other		Carcinoembryonic antigen-related cell adhesion molecule 7 OS=Homo sapiens OX=9606 GN=CEACAM7 PE=1 SV=1	CEACAM7	Q14002	18.151	12	3	7	3	265	29.4	2630		3				1.14073e+06			205109	961822	466201		468658	3.24709e+06	2.29986e+06	290153	153288	243888	681655	129654		453232	1.02357e+06	330887		3.15388e+06	223911	540248	512813	707631	751978
	Other		Carcinoembryonic antigen-related cell adhesion molecule 8 OS=Homo sapiens OX=9606 GN=CEACAM8 PE=1 SV=2	CEACAM8	P31997	22.594	14	4	19	3	349	38.1	10630		4			715982	92588.9	314058		692965	2164525		164592		592578	340959	552449			1.47287e+06			999857	3.20096e+06			1.00805e+06			518821	2.7709e+06	2.56524e+06
	Other		Complement factor H OS=Homo sapiens OX=9606 GN=CFH PE=1 SV=4	CFH	P08603	35.07	5	5	14	4	1231	139	5468		5			923064	696629	3.05575e+06	826111	743134	61607.1	531471	1.08152e+06	2.04957e+06	1.39158e+06	3.61964e+06		1.3041e+06	807782	815471	1.12301e+06	3.00961e+06	2.61372e+06	1.07734e+06	578950	1.23227e+06	1.04509e+06	2.47961e+06	1.68164e+06	513299	2.131e+06	528974
	Other		Complement factor H-related protein 5 OS=Homo sapiens OX=9606 GN=CFHR5 PE=1 SV=1	CFHR5	Q9BXR6	26.641	12	6	13	5	569	64.4	3823		6				324220		523322	1.19496e+06	634280	843937		1.23517e+06	1.84812e+06	6.94953e+06	3.02584e+06		1.07549e+06	2.60325e+06	2.59552e+06	5.25612e+06	3.3598e+06	905683	1.67523e+06			466698	422236	141809	1.13932e+07	2.41141e+06
	Other		Cofilin-1 OS=Homo sapiens OX=9606 GN=CFL1 PE=1 SV=3	CFL1	P23528	24.466	28	4	31	4	166	18.5	7156	29.68	3	1	Met-loss+Acetyl [N-Term]	257671	125828	3.02244e+06	450202	2.59919e+06	7.13877e+06	6.07903e+06	5.40043e+06	2.05046e+06	3.43485e+06	1.74703e+06	1.56669e+06	1.52493e+06	2.94446e+06	3.18733e+06	3.53702e+06	1.53128e+06	647936	2.92509e+06	1.89409e+06	863218	1.34559e+06	1.64107e+06	8.6592e+06	2.21825e+06	754554	8.13291e+06
	Other		Carbohydrate sulfotransferase 14 OS=Homo sapiens OX=9606 GN=CHST14 PE=1 SV=2	CHST14	Q8NCH0	27.466	12	5	30	5	376	43	14099		5			5.4914e+06	433375	331349	4.62548e+06	1.34322e+06	576979	157096	2.63973e+06	3.5292e+06	1.48187e+06	345230	360214	5.99657e+06	665349	906275	723261	1.12291e+07	2.02522e+06	986959	974907		183575		1.42463e+06	416813	2.69735e+06
	Other		Cold-inducible RNA-binding protein OS=Homo sapiens OX=9606 GN=CIRBP PE=1 SV=1	CIRBP	Q14011	12.139	13	2	21	2	172	18.6	8610		2			1.0286e+06					550240	2.79633e+06			7.1746e+06			1.54641e+06	1.37368e+06	567857		883285		5.2734e+06			354855				658636
	Other		Creatine kinase B-type OS=Homo sapiens OX=9606 GN=CKB PE=1 SV=1	CKB	P12277	17.444	10	3	6	2	381	42.6	2932		3							366001	645467						1.33488e+06		627406	838808			79894	311457					417045		146480	364407
	Other		Creatine kinase U-type, mitochondrial OS=Homo sapiens OX=9606 GN=CKMT1A PE=1 SV=1	CKMT1B; CKMT1A	P12532	72.01	30	11	70	10	417	47	31585		11			1.69944e+07	2.34499e+07	3.36423e+06	7.16825e+06	5.29928e+06	7.51645e+06	1.71996e+07	1.87514e+07	1.27118e+07	5.77863e+06	5.36303e+06	7.14533e+06	8.78925e+06	1.92029e+07	990472	1.47489e+07	9.23558e+06	3.14838e+06	1.22175e+07	1.018e+07	5.26582e+06	4.43366e+06	3.57169e+06	2.55385e+06	1.72503e+06	4.01785e+06	8.85935e+06
	Other		Calcium-activated chloride channel regulator 1 OS=Homo sapiens OX=9606 GN=CLCA1 PE=1 SV=3	CLCA1	A8K7I4	18.704	5	5	13	5	914	100.2	4624		5			395357	439328	445245		4.00978e+06	514944	7.1015e+06			1.6384e+06	828056	3.80871e+06	2.59267e+06	180916	898459	3.298e+06	5.26795e+06		691177				501939	167780			503675
	Other		Chloride intracellular channel protein 1 OS=Homo sapiens OX=9606 GN=CLIC1 PE=1 SV=4	CLIC1	O00299	10.704	9	2	2	2	241	26.9	1079		2					399251		1.65341e+06		964396												429703	886697				1.31916e+06	1.03676e+06	363389
	Other		Clathrin heavy chain 1 OS=Homo sapiens OX=9606 GN=CLTC PE=1 SV=5	CLTC	Q00610	155.441	11	18	86	18	1675	191.5	43629		18			3.98923e+07	3.90359e+06	2.97336e+06	1.30057e+07	4.73206e+06	7.82134e+06	1.70172e+07	2.26439e+06	5.70129e+06	5.46083e+07	7.95818e+06	6.09723e+06	1.68273e+07	2.59645e+07	5.20887e+06	3.5663e+06	6.60907e+06	1.00418e+06	9.22872e+06	9.85959e+06	1.16598e+07	4.66898e+06	1.71056e+07	1.37195e+07	2.68979e+06	1.40622e+06	5.55259e+06
	Other		Clusterin OS=Homo sapiens OX=9606 GN=CLU PE=1 SV=1	CLU	P10909	135.813	28	14	269	14	449	52.5	117536	2.28	14	1		2.72402e+07	1.08445e+07	1.41599e+07	2.16287e+07	1.73063e+07	2.5203e+07	3.31007e+07	3.89893e+07	2.54453e+07	6.88608e+07	4.12574e+07	8.12866e+06	6.01584e+07	4.21535e+07	3.81921e+07	1.28907e+07	6.43756e+07	6.26705e+07	2.33127e+07	4.23443e+07	2.24542e+07	1.37711e+07	2.33183e+07	1.70235e+07	9.56997e+06	6.87935e+07	7.11706e+07
	Other		Chymase OS=Homo sapiens OX=9606 GN=CMA1 PE=1 SV=1	CMA1	P23946	159.74	54	11	266	11	247	27.3	138042	51.46	10	2		2.27826e+08	1.41734e+07	3.23976e+06	9.32411e+07	1.76011e+07	1.96332e+07	1.1632e+08	1.04196e+08	1.0416e+07	1.32313e+07	4.50948e+07	4.0908e+07	5.31348e+07	1.36739e+07	2.87198e+07	5.18935e+07	1.0273e+08	6.11256e+07	5.85142e+06	2.60821e+07	1.8491e+07	2.16067e+07	3.52205e+06	6.20785e+06	1.09505e+08	8.65494e+06	2.95869e+06
	Other		Cellular nucleic acid-binding protein OS=Homo sapiens OX=9606 GN=CNBP PE=1 SV=1	CNBP	P62633	41.199	25	5	20	5	177	19.5	10337		5			306487	900764	163829		2.30841e+06	270017	1.84448e+06	98469.2	147444	351440	1.42548e+06	283322	1.57338e+06	1.31895e+06	842404	4.94457e+06	2.10291e+06	545963	4.07637e+06	186444	2.11752e+06	1.3032e+06	1.16163e+07	4.4843e+06	1.46805e+06	9.42579e+06	2.5787e+06
	Other		Calponin-1 OS=Homo sapiens OX=9606 GN=CNN1 PE=1 SV=2	CNN1	P51911	158.337	46	16	249	15	297	33.2	136707		16			3.06011e+06	1.79739e+06	5.08816e+06	5.54347e+06	2.372e+06	4.79938e+08	4.7224e+07	5.46984e+06	7.77153e+06	8.50825e+06	9.67928e+06	1.88978e+06	2.43929e+07	1.63584e+07	2.77808e+08	1.29189e+07	1.94564e+07	3.85622e+06	8.05176e+06	3.57947e+06	4.9177e+06	7.01084e+06	7.15086e+06	8.01905e+06	8.8204e+06	1.94743e+07	2.15406e+06
	Other		2',3'-cyclic-nucleotide 3'-phosphodiesterase OS=Homo sapiens OX=9606 GN=CNP PE=1 SV=2	CNP	P09543	6.964	4	2	2	2	421	47.5	884		2				966959		855975		235153			372209	264887	1.65992e+06	1.29873e+06	1.55282e+06	2.57622e+06	4.2897e+06	1.6288e+06	1.02255e+06		2.13725e+06	1.14195e+06		997960	818599	1.08302e+06
	Other		Coatomer subunit alpha OS=Homo sapiens OX=9606 GN=COPA PE=1 SV=2	COPA	P53621	24.286	4	5	11	5	1224	138.3	4461		5				174002	1.42476e+06	167757	814673	3.63591e+06	1.86113e+06	932909	1.7159e+06		2.49064e+06	1.4735e+06	1.98755e+06	3.23019e+06	1.53271e+06		141192	1.48571e+06	1.11469e+06	1.22071e+06	396792	317922	280476	7.21496e+06	170043	117301	169610
	Other		Coatomer subunit beta' OS=Homo sapiens OX=9606 GN=COPB2 PE=1 SV=2	COPB2	P35606	7.66	2	2	3	2	906	102.4	1060		2			184026	2.14488e+06	374457	1.00609e+06	676206	31555.3	602924		185294		198596	281433	353538	494886	179156					737371	366461	1.41415e+06		1.11658e+06	173552		1.24334e+06
	Other		Coatomer subunit gamma-1 OS=Homo sapiens OX=9606 GN=COPG1 PE=1 SV=1	COPG1	Q9Y678	42.061	8	5	13	5	874	97.7	7494		5						313971	4.14594e+06	451102	1.63433e+06	109627	689826			284497	425869	1.27205e+06		99378.3	1.23126e+06	1.032e+06	2.16502e+06	1.99881e+06	3.40141e+06	134212	277368	4.65567e+06		215354	124140
	Other		Coronin-7 OS=Homo sapiens OX=9606 GN=CORO7 PE=1 SV=2	CORO7	P57737	21.636	5	3	4	3	925	100.5	2145		3						323930			250077			38155.4		493045		248783					1.41398e+06	630061	237144			4.89342e+06
	Other		Cytochrome c oxidase subunit 1 OS=Homo sapiens OX=9606 GN=MT-CO1 PE=1 SV=1	COX1	P00395	14.324	5	3	6	3	513	57	3312		3			161986	528147	201657	1.23017e+06	589040	865922	3.92327e+06				771605	919116	563517	741648	1.38677e+06	6.55987e+06	41246.4	251724	2.17058e+06	1.49197e+06	638998	1.00477e+06	445058	4.24959e+06	318039	3.83326e+06	673687
	Other		Cytochrome c oxidase subunit 2 OS=Homo sapiens OX=9606 GN=MT-CO2 PE=1 SV=1	COX2	P00403	47.794	20	7	60	7	227	25.5	38727		7			1.16366e+06	1.30802e+06	6.26241e+06	1.42705e+06	6.44486e+06	2.20256e+07	1.86897e+07		901233	1.39289e+07	2.17795e+06	7.23388e+06	1.47828e+06	1.45682e+07	2.10809e+07	1.64331e+07	4.29913e+06	379966	7.41388e+06	5.00376e+06	7.55595e+06	9.16257e+06	4.79141e+06	1.6806e+07	1.59737e+06		1.26519e+06
	Other		Cytochrome c oxidase subunit 4 isoform 1, mitochondrial OS=Homo sapiens OX=9606 GN=COX4I1 PE=1 SV=1	COX4I1	P13073	30.261	30	5	31	5	169	19.6	16542		5				33288.7	2.42535e+06	338958	3.13648e+06	6.44579e+06	6.4091e+06		564128	9.39413e+06	3076.48	538636	961814	3.95746e+06	7.22839e+06	5.86269e+06	2.19026e+06		2.3868e+06	2.13241e+06	1.39053e+06	147242	861139	7.01936e+06
	Other		Cytochrome c oxidase subunit 5A, mitochondrial OS=Homo sapiens OX=9606 GN=COX5A PE=1 SV=2	COX5A	P20674	42.257	47	5	41	5	150	16.8	22480		5			1.71272e+06	107837	5.3364e+06	3.26727e+07	4.28769e+06	1.38516e+06	2.3096e+08	337437	1.24306e+07	2.74725e+06	4.99881e+07	1.1771e+06	6.83066e+07	4.89525e+06	1.05636e+08	2.13312e+08	1.99622e+06	4.84132e+07	8.38317e+06	5.9236e+06	1.55371e+07	685132	783594	6.8063e+06	1.13269e+06	1.21609e+07	1.72056e+07
	Other		Cytochrome c oxidase subunit 5B, mitochondrial OS=Homo sapiens OX=9606 GN=COX5B PE=1 SV=2	COX5B	P10606	38.042	43	6	21	6	129	13.7	7617		6				319636	3.83543e+06		2.29707e+06	632902	3.42896e+06	2.45336e+06	2.7113e+06	8.31396e+06	4.35476e+06	1.11851e+06	913377	2.4121e+06	2.31415e+06	2.66145e+06	3.93329e+06	2.30932e+06	1.02386e+06	1.15464e+06	643635	951405	1.21436e+06	1.38798e+06		507850	998926
	Other		Cytochrome c oxidase subunit 6C OS=Homo sapiens OX=9606 GN=COX6C PE=1 SV=2	COX6C	P09669	19.484	35	3	9	3	75	8.8	4489		3					2.80371e+06		821005	930644				70555.1				690768	266589		693610		89298		237969
	Other		Cytochrome c oxidase subunit 7A2, mitochondrial OS=Homo sapiens OX=9606 GN=COX7A2 PE=1 SV=1	COX7A2	P14406	23.335	27	3	11	3	83	9.4	5133		3				817290	1.52553e+06	320131	994822	1.52993e+07	2.64805e+06				39166.4	1.61525e+06	3.06826e+06	2.18136e+06	8.8135e+06	3.93982e+06	2.74957e+06	1.23573e+06	2.50665e+06	1.5889e+06	834771	123097	1.80453e+06	3.65971e+06		479481	4.2087e+06
	Other		Ceruloplasmin OS=Homo sapiens OX=9606 GN=CP PE=1 SV=1	CP	P00450	105.729	16	15	61	15	1065	122.1	29770		15			1.12354e+07	6.02587e+06	1.94662e+07	7.23871e+06	5.97192e+06	1.90225e+06	9.4482e+06	1.26953e+07	9.84161e+06	5.7477e+06	8.85051e+06	6.2129e+06	4.2738e+07	1.26443e+07	624964	4.01942e+06	1.81111e+07	1.75949e+07	1.10085e+07	3.04001e+06	2.969e+07	4.46898e+06	2.45408e+06	5.85518e+06	3.9846e+06	2.13425e+07	3.48502e+06
	Other		Mast cell carboxypeptidase A OS=Homo sapiens OX=9606 GN=CPA3 PE=1 SV=2	CPA3	P15088	111.234	40	16	537	14	417	48.6	255313	50.72	15	1		2.02379e+08	1.69463e+08	1.32292e+08	1.82088e+08	3.34707e+07	2.74643e+07	1.94518e+08	2.87558e+08	3.95019e+07	1.44895e+08	2.69695e+08	4.6367e+08	3.96913e+08	3.65602e+08	4.42159e+07	6.49022e+07	1.35456e+08	1.18921e+08	2.79804e+07	1.02729e+08	1.71061e+08	1.73853e+08	1.05026e+08	1.49115e+07	1.7247e+08	8.74436e+07	1.08089e+08
	Other		Carboxypeptidase B2 OS=Homo sapiens OX=9606 GN=CPB2 PE=1 SV=2	CPB2	Q96IY4	23.919	8	4	37	3	423	48.4	19165		4			2.03759e+06	3.53363e+06	562318	2.9937e+06	5.83109e+06		2.01577e+06	917752	1.4436e+06		610766			133650			204740	672879	1.24755e+06	403562		255150		91506.2		5.39487e+06	1.12202e+06
	Other		Carbamoyl-phosphate synthase [ammonia], mitochondrial OS=Homo sapiens OX=9606 GN=CPS1 PE=1 SV=2	CPS1	P31327	49.593	7	10	11	10	1500	164.8	6329		10			913251	930335	517091	1.40397e+06	2.29619e+06	756056	1.37457e+07	289748		223856	2.17273e+06	3.23785e+06	1.86374e+06	1.17881e+06	423470	4.42906e+06	1.31008e+06	1.24837e+07	1.66909e+06						7.17696e+06
	Other		Carnitine O-palmitoyltransferase 1, liver isoform OS=Homo sapiens OX=9606 GN=CPT1A PE=1 SV=2	CPT1A	P50416	11.442	4	3	12	3	773	88.3	5714		3				446833	214141			2.24936e+06	1.0352e+06	201859	1.40241e+06		266681		421244	1.46001e+06		202138	379966	359787	183726	1.47858e+06	459030		299541	769161	79540.8		1.90468e+06
	Other		Alpha-crystallin B chain OS=Homo sapiens OX=9606 GN=CRYAB PE=1 SV=2	CRYAB	P02511	41.161	41	6	10	6	175	20.1	5543		6					119292	508351	120180	1.70948e+07	1.9351e+06		425111	8.53054e+06	80257	1.68958e+06	5.95477e+06	1.6261e+06	402144				64384.9	730341	707123			645761		111374	504538
	Other		Cysteine and glycine-rich protein 1 OS=Homo sapiens OX=9606 GN=CSRP1 PE=1 SV=3	CSRP1	P21291	175.161	61	16	175	16	193	20.6	93745		16			1.10345e+07	1.47066e+07	2.58041e+07	1.29217e+07	8.53197e+06	3.41064e+08	2.88351e+07	1.2822e+07	1.03676e+07	1.61359e+07	5.64745e+07	1.41824e+07	1.86528e+07	2.47506e+07	1.51921e+08	3.39637e+07	2.76506e+07	3.44511e+07	8.8642e+06	5.3627e+06	2.1066e+06	6.54315e+06	2.10811e+07	1.3363e+07	1.30992e+07	2.10252e+07	2.21291e+07
	Other		Catenin alpha-1 OS=Homo sapiens OX=9606 GN=CTNNA1 PE=1 SV=1	CTNNA1	P35221	18.651	5	3	6	3	906	100	3431		3							399580	15291.2	185576		1.62749e+06		723945			562363	523765	346344		105071	98430.5	97768.9	246449	85679.8	206051	1.84807e+06	35234.4	122589	823414
	Other		Coxsackievirus and adenovirus receptor OS=Homo sapiens OX=9606 GN=CXADR PE=1 SV=1	CXADR	P78310	42.129	25	7	13	7	365	40	5063	3.03	6	1		4.39427e+06	3.34346e+06	2.79297e+06	326655	348971	36343.7	420576	1.06923e+06	7.09459e+06	345172	509985	636420	82418.2	2.11325e+06	253086	684635	552959	2.57625e+06	2.25882e+06	441361	629657	1.67884e+06	234379	509467	1.54639e+06	911115	752240
	Other		Cytochrome b5 type B OS=Homo sapiens OX=9606 GN=CYB5B PE=1 SV=3	CYB5B	O43169	43.752	48	5	38	5	150	16.7	18115		5			1.20532e+06	1.0155e+07	1.19662e+07	3.31543e+06	7.77045e+06	221903	6.62411e+06	5.46893e+06	8.96495e+06	3.69336e+07	7.05162e+06	7.92588e+06	4.29006e+06	4.24808e+06	1.132e+06	659222	3.22832e+06	9.18794e+06	6.29134e+06	8.68769e+06	4.4922e+06	1.0636e+07	6.16433e+06	3.02128e+06	7.64862e+06	9.07344e+06	1.24395e+07
	Other		NADH-cytochrome b5 reductase 1 OS=Homo sapiens OX=9606 GN=CYB5R1 PE=1 SV=1	CYB5R1	Q9UHQ9	6.363	7	2	13	2	305	34.1	2222		2			5.70406e+06	8.76564e+06	6.38574e+06	5.52241e+07	1.04935e+07	856185	4.37773e+07	9.40397e+06	8.41274e+06	3.53465e+06	7.91537e+06	2.41681e+07	2.52928e+07	8.9442e+06	1.61342e+07	6.6383e+07	5.48072e+06	1.06663e+07	1.15039e+07	8.87251e+06	1.98829e+07	1.63222e+07	1.96974e+07	4.18199e+07	6.38724e+07	7.91575e+06	5.54144e+06
	Other		NADH-cytochrome b5 reductase 3 OS=Homo sapiens OX=9606 GN=CYB5R3 PE=1 SV=3	CYB5R3	P00387	17.059	12	3	4	3	301	34.2	1308		3						1.97124e+08		8.21074e+06		1.90259e+07	119212	882362	9.61295e+08	192912			981445	350247	800220	280266		1.17496e+08	136257		182388	112203		7.82525e+06	3.17604e+07
	Other		Cytochrome b-245 heavy chain OS=Homo sapiens OX=9606 GN=CYBB PE=1 SV=2	CYBB	P04839	13.491	6	3	4	3	570	65.3	1765		3				747370			458498	311630	976705	473920		2.14086e+06	683162	1.02226e+06	370420		2.23704e+06	217910		38983	703181	2.7907e+06	450449		137056	2.23183e+06		73373.1	962986
	Other		Cytoplasmic FMR1-interacting protein 1 OS=Homo sapiens OX=9606 GN=CYFIP1 PE=1 SV=1	CYFIP1	Q7L576	17.408	5	5	10	5	1253	145.1	3933		5			4.41372e+06	2.23406e+06	163477	757296	2.42155e+06	283090	881051	2.85992e+06	70744.6		240032	968738	371602	543882		407703	331255		221201	563801	437800	1.08606e+06	1.27622e+06	1.30263e+06	137146	511579
	Other		Cytochrome b OS=Homo sapiens OX=9606 GN=MT-CYB PE=1 SV=2	CYTB	P00156	16.161	7	3	15	3	380	42.7	8665		3				1.53978e+06	227578	1.29272e+06	1.0233e+06	1.46869e+06	439594	2.65233e+06	2.23113e+06	18297.1	921431	521236	1.45554e+06	863128	379667	365481	8.23264e+06	1.30585e+06	3.47776e+06	1.62439e+06		185313	2.18667e+06	739417	523834	1.03245e+06	7.47112e+06
	Other		Dolichyl-diphosphooligosaccharide--protein glycosyltransferase subunit DAD1 OS=Homo sapiens OX=9606 GN=DAD1 PE=1 SV=3	DAD1	P61803	22.6	36	4	119	4	113	12.5	30327	130.38	3	1	Met-loss+Acetyl [N-Term]	9.92e+06	6.58886e+06	7.59647e+06	6.45912e+06	6.56167e+06	1.69084e+06	1.01131e+07	8.88157e+06	1.48902e+07	1.66491e+07	6.73713e+06	1.38507e+07	1.62176e+07	1.48825e+07	4.54223e+06	7.93598e+06	2.38537e+07	1.07837e+07	1.44395e+07	1.19828e+07	1.08834e+07	1.75926e+07	1.43159e+07	1.008e+07	9.83482e+06	1.15236e+07	1.00835e+07
	Other		Aspartate--tRNA ligase, cytoplasmic OS=Homo sapiens OX=9606 GN=DARS1 PE=1 SV=2	DARS	P14868	15.341	9	4	8	4	501	57.1	3068		4			2.31568e+06	134943	152880	153271		146913	583857		512597	310097		661246	299514	1.12508e+06	106197		104205		172448	492921	1.14187e+06			2.90935e+06		315500
	Other		Dermcidin OS=Homo sapiens OX=9606 GN=DCD PE=1 SV=2	DCD	P81605	17.979	41	3	9	3	110	11.3	3766		3			8.55521e+06	3.74582e+07	5.67005e+07	5.15509e+07	7.4963e+06	160019	8.20735e+06	2.20332e+07	3.13748e+07	262984	923357	1.01457e+07	4.8238e+07	1.30282e+07	9.44704e+06	8.75497e+06	4.84139e+06	2.73994e+06	1.10972e+07		1.69112e+07	852435	457177	4.17546e+06	4.46878e+06	3.5758e+06	4.36454e+06
	Other		L-xylulose reductase OS=Homo sapiens OX=9606 GN=DCXR PE=1 SV=2	DCXR	Q7Z4W1	14.845	14	3	8	3	244	25.9	3697		3					520662	171092	249938		880963	1.62898e+06	429914	79447.9	726706	175193	271683	107867	498676	664193	142878	491341	107433		186274		350195	925470		228821
	Other		Dolichyl-diphosphooligosaccharide--protein glycosyltransferase 48 kDa subunit OS=Homo sapiens OX=9606 GN=DDOST PE=1 SV=4	DDOST	P39656	19.075	7	3	13	3	456	50.8	6369		3				468454	365155	175745	631284	241291	1.29931e+06	159569	1.03072e+06	4.57332e+06	256732	624063		1.56536e+06	692005	1.50415e+06			835971	1.48848e+06	1.4094e+06	431321	228601	1.62652e+06		607908	2.06735e+06
	Other		Probable ATP-dependent RNA helicase DDX17 OS=Homo sapiens OX=9606 GN=DDX17 PE=1 SV=2	DDX17	Q92841	53.688	15	11	35	4	729	80.2	16858		11				4.46584e+06	764858	3.78866e+06	4.63335e+06	2.22805e+06	971650	1.48684e+06	1.48553e+06	1.45277e+06	1.45066e+06	3.10133e+06	2.06376e+06	4.7934e+06	5.58288e+06	4.81599e+06	6.36619e+06	3.46468e+06	3.60287e+06	3.33221e+06	2.33534e+06	1.35816e+06	3.18568e+06	3.16715e+07	1.52991e+06	4.80963e+06	5.38991e+06
	Other		Nucleolar RNA helicase 2 OS=Homo sapiens OX=9606 GN=DDX21 PE=1 SV=5	DDX21	Q9NR30	13.561	4	3	3	3	783	87.3	1290		3			518171				937846						293916	917666		219707	1.1262e+06	262037	223397			365616	536396	575226	419944	1.82756e+06
	Other		Probable ATP-dependent RNA helicase DDX27 OS=Homo sapiens OX=9606 GN=DDX27 PE=1 SV=2	DDX27	Q96GQ7	8.414	3	2	2	2	796	89.8	742		2									536194	247249	169189	38652.3									216756	245416		489965		1.0547e+06		576294
	Other		Spliceosome RNA helicase DDX39B OS=Homo sapiens OX=9606 GN=DDX39B PE=1 SV=1	DDX39B	Q13838	17.217	5	2	12	2	428	49	7130		2						300836	109073	1.57863e+06	665350		916201	1.37596e+06	411225		892385	413414	1.55484e+06	349046	490942	540967	1.27942e+06	4.83688e+06		576269	282595	4.96256e+06	587530		1.86463e+06
	Other		ATP-dependent RNA helicase DDX3X OS=Homo sapiens OX=9606 GN=DDX3X PE=1 SV=3	DDX3X	O00571	60.088	16	11	30	8	662	73.2	16086		11			3.18272e+06	941104		76037	1.87919e+06	8.30647e+06	1.81039e+06	704347		30848.6		117035	75380.4	597727	1.38143e+06	740270			376489	567492		146424	184437	6.15651e+06	59654.9	559038	544861
	Other		Probable ATP-dependent RNA helicase DDX5 OS=Homo sapiens OX=9606 GN=DDX5 PE=1 SV=1	DDX5	P17844	49.704	16	10	36	3	614	69.1	17190		10			1.85632e+06	195215		1.06149e+06		63511.7	800685	1.00352e+06						689195	402552				283591	674039				1.49784e+07			680897
	Other		Probable ATP-dependent RNA helicase DDX6 OS=Homo sapiens OX=9606 GN=DDX6 PE=1 SV=2	DDX6	P26196	12.627	7	3	3	3	483	54.4	1377		3					168320				742451			592357	1.01809e+06	601647	5.71278e+06	336453	1.87841e+06	5.53872e+06				822671	177821	386866	1.4319e+06	8.93494e+06		226593
	Other		Neutrophil defensin 1 OS=Homo sapiens OX=9606 GN=DEFA1 PE=1 SV=1	DEFA1; DEFA1B	P59665	73.088	21	7	579	7	94	10.2	319797		7			1.45607e+08	3.67309e+08	1.91899e+08	8.17526e+07	1.34094e+08	879905	1.02075e+08	1.54493e+08	2.84466e+08	2.40855e+07	2.69252e+08	7.99161e+07	4.91495e+07	3.81362e+07	2.99312e+07	5.56078e+07	1.70393e+07	3.63509e+08	4.0491e+08	1.47733e+08	4.66347e+07	7.67391e+08	5.60398e+07	2.81837e+08	2.70172e+09	1.14551e+09	2.13333e+08
	Other		Desmin OS=Homo sapiens OX=9606 GN=DES PE=1 SV=3	DES	P17661	658.346	76	58	1774	50	470	53.5	968273	4.85	58	2		4.42557e+08	4.27867e+08	4.50852e+08	4.4739e+08	5.809e+08	3.94591e+09	5.84767e+08	3.69831e+08	3.35424e+08	5.7032e+08	4.68061e+08	4.63578e+08	4.92551e+08	5.26132e+08	1.02376e+09	4.78793e+08	4.46842e+08	3.5741e+08	2.34283e+08	3.43953e+08	4.7767e+08	5.49301e+08	3.70983e+08	3.97474e+08	6.26513e+08	3.42816e+08	2.93376e+08
	Other		ATP-dependent RNA helicase A OS=Homo sapiens OX=9606 GN=DHX9 PE=1 SV=4	DHX9	Q08211	11.296	2	2	3	2	1270	140.9	1768		2				507437	606505	1.32589e+06	772918			839993			3.85393e+06			355588			446661			409816	394782	1.86044e+06	377215	4.50295e+06	317229	1.09882e+06	901292
	Other		DnaJ homolog subfamily B member 9 OS=Homo sapiens OX=9606 GN=DNAJB9 PE=1 SV=1	DNAJB9	Q9UBS3	20.853	30	4	18	4	223	25.5	4196	26.27	1	3		384694			7.89998e+06	417231			156272		4.30907e+06		186978	6.3076e+06	3.36167e+06	435797	8.05861e+06	393295		5.69689e+06	105809			107113	188774			418166
	Other		Deoxyribonuclease gamma OS=Homo sapiens OX=9606 GN=DNASE1L3 PE=1 SV=1	DNASE1L3	Q13609	6.306	11	3	10	3	305	35.5		27.2		3		1.8388e+07			83854.1		527893			1.63975e+06	2.7789e+06									3.40917e+06	499891		89637.3	129721	90776.7	89949.9	316565
	Other		Dipeptidyl peptidase 4 OS=Homo sapiens OX=9606 GN=DPP4 PE=1 SV=2	DPP4	P27487	64.152	15	11	44	11	766	88.2	17557		11			1.64458e+07	9.43064e+06	2.56018e+06	1.72483e+06	3.58332e+06	3.51351e+06	1.43272e+06	4.02147e+06	1.28078e+07	6.29743e+06	6.94075e+06	9.19783e+06	2.03145e+06	1.04705e+07	818765	8.11414e+06	5.31804e+06	1.57602e+07	6.7339e+06	3.94609e+06	2.02397e+06	2.23793e+07	9.81581e+06	7.05184e+06	9.28614e+06	1.2502e+07	3.82933e+06
	Other		Dihydropyrimidinase-related protein 2 OS=Homo sapiens OX=9606 GN=DPYSL2 PE=1 SV=1	DPYSL2	Q16555	66.455	18	8	57	6	572	62.3	24843		8			3.24875e+06	4.35906e+06	7.24428e+06	1.66555e+06	1.72107e+06	1.93438e+07	1.19035e+07	3.20548e+06	3.31786e+06	4.65674e+06	1.05847e+07	924767	3.75776e+06	7.6528e+06	1.08364e+07	8.15909e+06	2.80879e+06	622026	3.70151e+06	3.82016e+06	717773	937306	3.04163e+06	7.148e+06		253279	5.78065e+06
	Other		Dihydropyrimidinase-related protein 3 OS=Homo sapiens OX=9606 GN=DPYSL3 PE=1 SV=1	DPYSL3	Q14195	99.842	22	10	78	8	570	61.9	38011		10			3.32007e+06	249259	1.65807e+06	1.70154e+06	1.5307e+06	1.56155e+07	1.35737e+07	1.15884e+06	954195	2.19452e+07	1.98542e+07	5.00952e+06	4.61167e+06	1.33294e+07	2.26446e+07	6.12803e+06	8.76787e+06	6.79575e+06	2.40395e+06	3.59425e+06	5.32784e+06	2.91833e+06	8.58428e+06	3.28348e+06	2.55146e+06	2.83681e+06	4.20651e+06
	Other		Desmoplakin OS=Homo sapiens OX=9606 GN=DSP PE=1 SV=3	DSP	P15924	77.631	5	14	28	14	2871	331.6	11458		14			2.41905e+06	362564	3.13672e+07	4.78543e+06	9.36248e+06	9.23284e+06	5.88295e+06	2.32085e+06	3.36917e+07	733047	1.1452e+06	5.27862e+06	954292	5.20838e+06	2.63246e+06	2.53023e+06	967466	751159	4.36475e+06	1.22161e+07	6.1226e+06	833027	1.37582e+06	7.93009e+06	2.17071e+06	3.80702e+06	3.63422e+06
	Other		Destrin OS=Homo sapiens OX=9606 GN=DSTN PE=1 SV=3	DSTN	P60981	49.248	44	9	43	9	165	18.5	9802	59.7	8	1	Met-loss+Acetyl [N-Term]	3.2798e+06	3.09332e+06	3.4185e+06	1.16692e+06	4.9714e+06	3.56808e+07	2.51067e+07	773610	1.98899e+06	9.07755e+06	5.62195e+06	5.10314e+06	8.26597e+06	1.78393e+07	5.13458e+07	1.51856e+07	2.45506e+07	2.00532e+06	9.45002e+06	7.43835e+06	3.34486e+06	1.02755e+06	2.05523e+07	1.185e+07	1.25639e+06	1.74598e+06	1.06829e+06
	Other		Cytoplasmic dynein 1 heavy chain 1 OS=Homo sapiens OX=9606 GN=DYNC1H1 PE=1 SV=5	DYNC1H1	Q14204	151.634	6	23	61	23	4646	532.1	27817		23			3.75178e+07	861926		961408	3.56675e+06	2.31488e+07	5.34131e+06	381112	1.08994e+06	1.02957e+06	2.03996e+07	3.78082e+07	2.86456e+06	6.55485e+06	1.05104e+07	684019	567068	1.202e+06	2.63566e+07	3.00192e+07	2.73559e+06	1.52762e+06	2.51937e+07	7.92681e+06	3.64142e+06	1.88485e+06	1.05624e+06
	Other		Enoyl-CoA hydratase, mitochondrial OS=Homo sapiens OX=9606 GN=ECHS1 PE=1 SV=4	ECHS1	P30084	8.895	12	2	2	2	290	31.4	589		2					150104				319073	77660.4	47983.1							264879		103380				217407	259989		57456.9	123820	172511
	Other		Elongation factor 1-alpha 1 OS=Homo sapiens OX=9606 GN=EEF1A1 PE=1 SV=1	EEF1A1	P68104	278.631	44	30	423	30	462	50.1	209445		30			5.37422e+07	1.24911e+07	2.25037e+07	7.90874e+06	2.16736e+07	8.48369e+07	1.42666e+08	1.11621e+09	2.32059e+07	3.44952e+07	3.19041e+07	1.61006e+07	3.01692e+07	6.44482e+07	1.10657e+08	1.59808e+08	2.30332e+08	7.93016e+08	5.52008e+07	4.14927e+07	3.23216e+07	4.48296e+07	3.35861e+07	2.51695e+08	1.80241e+08	1.02119e+09	4.30759e+08
	Other		Elongation factor 2 OS=Homo sapiens OX=9606 GN=EEF2 PE=1 SV=4	EEF2	P13639	119.878	24	18	57	18	858	95.3	25230		18			3.9722e+07	2.64039e+06	1.33404e+06	2.56038e+06	7.49092e+06	1.37916e+07	1.52955e+07	624150	1.9352e+06	7.55308e+06	1.78965e+06	1.11727e+07	3.1164e+06	5.15567e+06	3.40125e+06	4.10073e+06	4.35589e+06	2.93916e+06	7.38416e+06	1.27729e+07	1.38674e+06	6.96235e+06	2.92548e+06	4.36335e+07	9.31429e+06	2.38444e+06	5.23177e+07
	Other		EH domain-containing protein 2 OS=Homo sapiens OX=9606 GN=EHD2 PE=1 SV=2	EHD2	Q9NZN4	15.27	5	3	17	3	543	61.1	8037		3			1.45332e+06	2.17797e+06	817360	164298	819313	8.43379e+06	2.38714e+06	1.7668e+06	3.2805e+06		1.08273e+06	1.78987e+06	2.75875e+06	6.67709e+06	4.79699e+06	1.47514e+06	9.26731e+06	896603	3.79083e+06	704233	1.79081e+06	1.12921e+06	2.77807e+06	1.48471e+06	115445	2.33322e+06	506011
	Other		Eukaryotic translation initiation factor 3 subunit E OS=Homo sapiens OX=9606 GN=EIF3E PE=1 SV=1	EIF3E	P60228	5.21	4	2	3	2	445	52.2	1677		2			5.32157e+06			8.95574e+06			601535			17096.2	6.14954e+06		426163		2.32302e+06		6.29424e+06			444669		1.20859e+06		1.83463e+06
	Other		Eukaryotic initiation factor 4A-I OS=Homo sapiens OX=9606 GN=EIF4A1 PE=1 SV=1	EIF4A1	P60842	103.876	34	14	60	12	406	46.1	30072		14			1.2443e+08	2.97265e+08	3.5714e+08	7.8957e+07	2.64981e+08	2.62132e+06	2.31835e+07	1.80373e+08	794998	4.0125e+06	1.25342e+07	629017	3.05154e+06	5.1051e+06	8.8377e+06	1.41365e+07	4.82419e+06	1.34819e+06	4.8613e+06	2.75216e+07	1.9787e+06	3.58328e+06	2.3199e+08	1.00602e+08	1.93857e+06	4.2172e+06	6.38084e+06
	Other		Eukaryotic initiation factor 4A-III OS=Homo sapiens OX=9606 GN=EIF4A3 PE=1 SV=4	EIF4A3	P38919	23.056	9	4	9	2	411	46.8	3503		4													212024			449380	366943		307002		591206	282333				4.3537e+06
	Other		Elongation of very long chain fatty acids protein 1 OS=Homo sapiens OX=9606 GN=ELOVL1 PE=1 SV=1	ELOVL1	Q9BW60	9.667	10	2	5	2	279	32.6	419	11.32	1	1	Acetyl [N-Term]			122617	67751.7		173556	531788	570285	5838.56		130563			424476	275995	648259	553005				413348	63901.9	505187	1.73287e+06	61856.7	175265	677797
	Other		Epithelial membrane protein 1 OS=Homo sapiens OX=9606 GN=EMP1 PE=1 SV=3	EMP1	P54849	20.992	8	3	33	3	157	17.6	17656		3			137095				3.30023e+06	240892	1.38713e+06	2.22022e+06	8.07106e+06	1.00197e+06	4.13283e+06	443904	673215	514008	1.79026e+06	221170	702918	9.01802e+06	611697	397029	1.4043e+06	6.7881e+06	1.63734e+06	1.2791e+06	2.94023e+06	1.76486e+07	5.94511e+06
	Other		Alpha-enolase OS=Homo sapiens OX=9606 GN=ENO1 PE=1 SV=2	ENO1	P06733	11.576	9	2	11	2	434	47.1	4568		2			1.10765e+07	5.68558e+07	6.54497e+07	224190	7.87696e+06	83951.5	2.43918e+06			2.94616e+07	720401	1.82352e+06		560126	7.99283e+06	1.52444e+06	1.96502e+06		1.12416e+06	664187	1.30484e+06	525211		8.01746e+06	176468		882539
	Other		Glycerophosphocholine cholinephosphodiesterase ENPP6 OS=Homo sapiens OX=9606 GN=ENPP6 PE=1 SV=2	ENPP6	Q6UWR7	30.347	9	3	8	3	440	50.2	4551		3			4.32461e+06	119086		349224	431178	92936.2	1.88502e+06	165529	1.21607e+06		446846		165852	1.72537e+06		7.92598e+06	663998	225376	712347	712522	865605	132524	352839	277953		121965
	Other		Epithelial cell adhesion molecule OS=Homo sapiens OX=9606 GN=EPCAM PE=1 SV=2	EPCAM	P16422	59.13	21	6	43	6	314	34.9	19710		6			8.71008e+06	1.62046e+06	1.30783e+06	647709	3.58222e+06	130146	1.05606e+07	599571		5.97879e+06	2.83085e+06	6.83232e+06	227355	2.1036e+06	307664	3.38281e+07	1.30516e+07	1.4139e+06	1.57729e+07	1.79934e+07	1.63459e+06	1.14763e+07	628987	1.49491e+07	105039	624017	1.53317e+07
	Other		Epiplakin OS=Homo sapiens OX=9606 GN=EPPK1 PE=1 SV=3	EPPK1	P58107	23.666	5	3	5	2	5088	555.3	2133		3			3.14849e+06					5.65547e+06	2.08672e+06			3.56176e+06	629653				757255		2.69519e+06	302279								1.02655e+06
	Other		Eosinophil peroxidase OS=Homo sapiens OX=9606 GN=EPX PE=1 SV=2	EPX	P11678	311.073	48	38	1877	31	715	81	984976	311.58	30	14		3.29211e+08	1.33474e+08	5.71268e+07	2.0542e+08	4.1178e+08	4.34071e+07	4.46794e+08	4.31579e+08	1.8215e+08	3.38695e+08	1.8046e+08	1.77415e+08	4.55246e+08	3.46605e+08	3.03257e+07	1.20488e+09	2.49207e+08	2.16904e+08	6.51913e+08	2.3275e+08	4.4183e+07	1.35253e+08	1.77619e+08	1.3693e+09	1.1879e+09	2.36422e+08	3.99087e+07
	Other		Endoplasmic reticulum metallopeptidase 1 OS=Homo sapiens OX=9606 GN=ERMP1 PE=1 SV=2	ERMP1	Q7Z2K6	12.24	4	3	4	3	904	100.2	821	4.68	2	1					1.27672e+06	6.30155e+06	1.37085e+07	212681			4.0205e+06	439269		2.04812e+07	1.18616e+06	1.28714e+06		563213	97520.8	5.47459e+06	7.36032e+06	277622		393088	647698			8.31721e+06
	Other		Junctional adhesion molecule A OS=Homo sapiens OX=9606 GN=F11R PE=1 SV=1	F11R	Q9Y624	24.889	22	5	11	5	299	32.6	5109		5			646879	138981				19515.3	1.48987e+06			100998	95158.4	117094	486782	635137	111859	1.13032e+06	1.22889e+06		1.74267e+06	1.95439e+06		8.9538e+06	1.37326e+06	4.45944e+06	575044	3.19449e+06	8.18592e+06
	Other		Constitutive coactivator of PPAR-gamma-like protein 1 OS=Homo sapiens OX=9606 GN=FAM120A PE=1 SV=2	FAM120A	Q9NZB2	32.119	6	5	6	5	1118	121.8	2894		5							384779		792529	4.32247e+06		251181	1.22949e+06		488376	609060	199909	240133		5.39966e+06	376492				1.7391e+06	4.5484e+06	1.39871e+06
	Other		Prolyl endopeptidase FAP OS=Homo sapiens OX=9606 GN=FAP PE=1 SV=5	FAP	Q12884	60.874	14	10	77	9	760	87.7	37372		10			4.50701e+06	430096		807329	1.65746e+06	9.16302e+06	790901			1.73325e+07	1.54208e+06	6.16416e+06	453070	1.06255e+06	2.39214e+06	3.90707e+06	5.49837e+06	1.38447e+06	7.98658e+06	6.5952e+06	2.68886e+06	4.17714e+07	7.42122e+06	2.20597e+07	9.36207e+06	2.89782e+07	7.77569e+06
	Other		Fatty acid synthase OS=Homo sapiens OX=9606 GN=FASN PE=1 SV=3	FASN	P49327	28.006	2	3	6	3	2511	273.3	3561		3								67142.3	1.57361e+06				90386.8	385680	111789	265677	135470	277042		607790	507434	260989		105041		2.64908e+06	247563	84523.8	288834
	Other		rRNA 2'-O-methyltransferase fibrillarin OS=Homo sapiens OX=9606 GN=FBL PE=1 SV=2	FBL	P22087	8.841	6	2	5	2	321	33.8	2235		2			412266			258733	1.8914e+08	5.60147e+06	1.80803e+06	1.38359e+06	1.43442e+06		270811	1.23312e+08	419905	1.02867e+08	795621	660395	877265			1.8823e+08			204216	3.95294e+06	539058		2.76522e+06
	Other		IgGFc-binding protein OS=Homo sapiens OX=9606 GN=FCGBP PE=1 SV=3	FCGBP	Q9Y6R7	292.517	16	41	139	41	5405	571.6	57934	15.85	38	3		4.07328e+07	9.25102e+06	6.85163e+06	5.29452e+07	5.21749e+07	1.12384e+07	2.05574e+08	2.35192e+07	7.7784e+06	1.02318e+07	1.99398e+07	1.84885e+07	3.07083e+07	2.66294e+07	1.80934e+07	1.12992e+08	6.55245e+07	1.66937e+07	7.71743e+07	2.89182e+07	5.18803e+07	1.17322e+07	1.53797e+07	2.8049e+07	1.9021e+07	2.2371e+07	1.85933e+07
	Other		Fermitin family homolog 2 OS=Homo sapiens OX=9606 GN=FERMT2 PE=1 SV=1	FERMT2	Q96AC1	50.618	10	5	14	5	680	77.8	5846		5			230144	173745	633755	278078	1.17256e+06	2.76741e+06	2.33799e+06	2.2009e+06	1.35336e+06	2.43053e+06	1.87487e+06	1.44449e+06	1.32419e+06	936489	5.4526e+06	718210	1.94085e+06	1.09854e+06	125271			259720	250244	202079	3.74834e+06	116565	1.45453e+06
	Other		Fermitin family homolog 3 OS=Homo sapiens OX=9606 GN=FERMT3 PE=1 SV=1	FERMT3	Q86UX7	7.414	3	2	3	2	667	75.9	1497		2										159474					122771				295578					107012		885274		273824	908745
	Other		Four and a half LIM domains protein 1 OS=Homo sapiens OX=9606 GN=FHL1 PE=1 SV=4	FHL1	Q13642	168.769	37	13	341	13	323	36.2	156805		13			5.20832e+07	3.85515e+07	5.17602e+07	4.15355e+07	6.08596e+07	4.53889e+08	1.14871e+08	1.48661e+07	2.41436e+07	7.47745e+07	6.81955e+07	5.37099e+07	6.99654e+07	1.25103e+08	3.51721e+08	6.77558e+07	3.01113e+07	1.48516e+08	7.28525e+07	1.58303e+07	2.21938e+07	1.7864e+07	6.5144e+07	1.46567e+07	2.28753e+07	1.82723e+07	2.14155e+07
	Other		Four and a half LIM domains protein 2 OS=Homo sapiens OX=9606 GN=FHL2 PE=1 SV=3	FHL2	Q14192	41.751	33	8	19	8	279	32.2	7837		8				1.10778e+06	1.61899e+06	1.39154e+06	514957	585683	3.48763e+06	410905	69222.2	1.02162e+06	1.14536e+06		905095	1.43509e+06	282916	1.64242e+06	604082		1.14745e+06	5.76544e+06		2.13687e+06	3.05936e+06	1.85939e+07		721766	3.17086e+06
	Other		Four and a half LIM domains protein 3 OS=Homo sapiens OX=9606 GN=FHL3 PE=1 SV=4	FHL3	Q13643	7.392	6	2	2	2	280	31.2	863		2
	Other		Filamin-A OS=Homo sapiens OX=9606 GN=FLNA PE=1 SV=4	FLNA	P21333	1812.31	61	162	2150	146	2647	280.6	1074381		162			3.58514e+08	9.65482e+07	3.11318e+08	1.25146e+09	1.57745e+08	1.7303e+09	8.23195e+08	7.10852e+08	3.42717e+08	5.84823e+08	3.30156e+08	1.82755e+08	2.56628e+08	6.28269e+08	1.518e+09	2.51179e+08	3.84152e+08	3.12621e+08	3.54864e+08	2.07818e+08	4.74571e+08	1.53597e+08	4.68935e+08	2.23603e+08	2.8708e+08	2.70691e+08	5.152e+08
	Other		Filamin-C OS=Homo sapiens OX=9606 GN=FLNC PE=1 SV=3	FLNC	Q14315	734.546	36	85	537	69	2725	290.8	264111	1.83	85	1		5.09454e+07	3.67512e+08	4.10676e+08	4.88013e+07	4.3694e+07	3.54198e+08	6.16471e+07	3.88533e+07	4.2688e+07	4.88422e+07	9.07471e+07	5.9159e+07	2.53493e+07	8.0283e+07	1.20023e+08	1.69294e+07	2.4363e+07	1.57726e+07	1.22955e+07	1.27855e+08	1.35342e+08	4.69547e+08	2.42635e+08	1.72602e+07	5.05133e+07	4.72118e+07	1.34073e+07
	Other		Folate receptor beta OS=Homo sapiens OX=9606 GN=FOLR2 PE=1 SV=4	FOLR2	P14207	38.274	27	6	43	6	255	29.3	24004		6			7.69422e+06	5.39923e+06	4.60186e+06	3.21362e+06	2.97105e+06	1.33821e+06	2.51596e+06	2.3121e+06	8.3126e+06	1.57373e+06	6.20459e+06	3.15977e+06	1.20359e+06	2.79691e+06	3.2697e+06	3.13373e+06	3.6479e+06	7.39179e+06	1.87607e+06	1.84845e+06	1.6012e+06	2.38921e+06	896763	2.52954e+06	82565.5	130793	2.1801e+06
	Other		Far upstream element-binding protein 1 OS=Homo sapiens OX=9606 GN=FUBP1 PE=1 SV=3	FUBP1	Q96AE4	22.941	9	5	20	5	644	67.5	9121		5			2.13684e+06		252870	1.51666e+06	1.17896e+07	124191	2.21509e+06	2.8723e+06	441338		2.88966e+06	595005	641825	562600	1.04892e+06	1.00715e+06	3.99087e+06	4.34761e+06	747913	108303	627615	884231	136001	6.65911e+06	329865	1.46934e+06	349901
	Other		Glyceraldehyde-3-phosphate dehydrogenase OS=Homo sapiens OX=9606 GN=GAPDH PE=1 SV=3	GAPDH	P04406	105.035	41	8	46	8	335	36	20629		8			6.17587e+07	2.63927e+06	1.23951e+06	2.21836e+07	5.88992e+07	1.50469e+07	1.2717e+07	6.39392e+06	6.42445e+06	440094	2.09931e+06	1.55057e+07	4.68243e+06	1.48631e+07	1.89818e+07	2.03863e+07	2.11094e+07	1.17106e+06	7.23771e+06	3.30395e+06	3.08518e+07	931458	1.10985e+06	1.54575e+07	4.92199e+06	7.72903e+06	1.2346e+07
	Other		eIF-2-alpha kinase activator GCN1 OS=Homo sapiens OX=9606 GN=GCN1 PE=1 SV=6	GCN1L1; GCN1	Q92616	23.633	2	4	8	4	2671	292.6	3835		4				160156	85672.6	117296			308241	40082.7	42319.7	31712.2				822938		98833.3				1.34255e+06		23316		1.55839e+06	154558
	Other		Lysophospholipase D GDPD3 OS=Homo sapiens OX=9606 GN=GDPD3 PE=2 SV=3	GDPD3	Q7L5L3	28.879	14	4	12	4	318	36.6	7454		4			6.79788e+07	262913			1.26187e+06	211846	126105	343114	124691	5.54058e+06	97274.5	1.02912e+06	498468	1.5982e+06			216185		1.33135e+06	2.22502e+06	394364	935412	355536	1.19251e+06		986111	5.95907e+07
	Other		Glutamine--fructose-6-phosphate aminotransferase [isomerizing] 1 OS=Homo sapiens OX=9606 GN=GFPT1 PE=1 SV=3	GFPT1	Q06210	20.723	7	4	6	4	699	78.8	2496		4					513947	697168	345822	35928	913588	148052	388276	530886			98530.8	1.19099e+06	297448		1.21881e+06		165453	232939	594600		244709	750375		402438
	Other		Inactive glutathione hydrolase 2 OS=Homo sapiens OX=9606 GN=GGT2 PE=1 SV=3	GGT2	P36268	19.669	5	3	22	3	569	61.7	10442		3			2.67151e+06	2.23937e+06	8.44937e+06		625205		412349	1.42102e+06	2.82765e+06		1.52684e+06	1.88426e+06	370824	1.04945e+06		238692	1.59306e+06	2.81926e+06	381372	863822	265343	599627	712802	1.45889e+06	1.0418e+06		976449
	Other		Growth hormone-inducible transmembrane protein OS=Homo sapiens OX=9606 GN=GHITM PE=1 SV=2	GHITM	Q9H3K2	14.515	9	3	28	3	345	37.2	11662		3			1.16007e+06	2.6597e+06	1.59016e+06	797141	4.66076e+06	3.61945e+07	2.71339e+06	964975	5.34834e+06	106137	2.34187e+06	1.99532e+06	3.54079e+06	4.74883e+06	3.86978e+06	5.50448e+06	248056	4.28749e+06	3.7501e+06	9.28842e+06	2.80009e+06	232811	2.61573e+06	8.65812e+06	902608	8.39384e+06	1.72683e+07
	Other		Gastrokine-2 OS=Homo sapiens OX=9606 GN=GKN2 PE=1 SV=2	GKN2	Q86XP6	12.87	12	2	5	2	184	20.5	2523		2					193104	733692	479509	891378	2.57647e+06	64312.3	51855.8		269914	1.04831e+06		5.91279e+06	359031	474874			858398	386385	2.96249e+06	49691.4	489181	724418
	Other		Guanine nucleotide-binding protein G(i) subunit alpha-2 OS=Homo sapiens OX=9606 GN=GNAI2 PE=1 SV=3	GNAI2	P04899	40.013	28	7	35	7	355	40.4	15121		7			1.54251e+06	2.23813e+06	2.40057e+06	1.19569e+06	2.325e+06	2.86722e+06	1.13504e+06	1.62517e+06	2.59531e+06	3.0891e+06	3.2635e+06	782791	2.83214e+06	2.08024e+06	3.1818e+06	2.23029e+06	4.28719e+06	2.38083e+06	2.26641e+06	5.45293e+06	2.03853e+06	2.50066e+06	5.19724e+06	5.00709e+06	6.40125e+06	1.26614e+07	5.67664e+06
	Other		Receptor of activated protein C kinase 1 OS=Homo sapiens OX=9606 GN=RACK1 PE=1 SV=3	GNB2L1; RACK1	P63244	82.975	57	15	71	15	317	35.1	33189		15			4.17661e+07	6.09742e+06	6.83597e+06	2.19115e+06	2.24417e+07	2.4907e+06	1.05457e+07	2.90486e+06	1.4675e+07	2.16375e+07	7.7213e+06	1.94447e+07	6.82678e+06	2.47846e+07	5.78014e+06	1.16406e+07	1.11832e+07	5.2191e+06	2.42834e+07	1.19736e+07	1.13869e+07	4.6163e+06	4.71414e+06	3.53172e+07	2.12016e+06	1.60597e+07	1.33686e+07
	Other		Guanine nucleotide-binding protein G(I)/G(S)/G(O) subunit gamma-12 OS=Homo sapiens OX=9606 GN=GNG12 PE=1 SV=3	GNG12	Q9UBI6	4.87	32	2	2	2	72	8	891		2							436590	311098	899024			305649				658355	906836				160372				519885	669628
	Other		Glucosamine 6-phosphate N-acetyltransferase OS=Homo sapiens OX=9606 GN=GNPNAT1 PE=1 SV=1	GNPNAT1	Q96EK6	49.444	14	5	34	5	184	20.7	22149		5			7.18288e+06	1.00649e+07	5.21307e+06	2.72023e+06	2.48351e+06	69749.4	1.63543e+06	8.14112e+06	5.08117e+06		4.46798e+06	5.18813e+06	6.72439e+06	3.96505e+06	567258	6.42025e+06	8.52056e+06	3.0931e+06	3.82122e+06	7.19901e+06	4.29352e+06	1.15018e+07	8.31785e+06	1.18818e+06	1.47226e+06	2.24914e+06	6.34747e+06
	Other		Cell surface A33 antigen OS=Homo sapiens OX=9606 GN=GPA33 PE=1 SV=1	GPA33	Q99795	8.838	7	2	4	2	319	35.6	1325		2						377920	435739	38207.6	687089		85395.6	3.05013e+06	150590	3.31463e+06		2.43761e+06		1.77284e+06	346723	613850					241217	959714	287949	830863	840263
	Other		Phospholipid hydroperoxide glutathione peroxidase OS=Homo sapiens OX=9606 GN=GPX4 PE=1 SV=3	GPX4	P36969	32.27	33	7	21	7	197	22.2	11001		7			1.55236e+06	1.54122e+06		275657	1.73862e+06	1.97255e+06	2.89421e+06	765221	1.46681e+06	1.21313e+07	2.54716e+06	2.29647e+06	769434	4.9527e+06	1.10665e+06	2.05589e+06	912778	3.59205e+06	2.54661e+06	3.99205e+06	1.50274e+06	2.21536e+06	5.00475e+06	7.14027e+06	1.37643e+06	2.22061e+06	4.35382e+06
	Other		Gremlin-2 OS=Homo sapiens OX=9606 GN=GREM2 PE=1 SV=1	GREM2	Q9H772	24.038	27	3	26	2	168	19.3	8454	21.79	2	1		4.41893e+06	105348	88870.1	2.23696e+06			410249	1.24825e+06	904830	5.67294e+06	572855		2.99657e+06			124363	841055
	Other		Glutathione reductase, mitochondrial OS=Homo sapiens OX=9606 GN=GSR PE=1 SV=2	GSR	P00390	16.977	8	4	25	4	522	56.2	7878		4			1.62847e+06	3.76459e+06	754723	84767.3	357910	4.20767e+06	3.48382e+06		1.43648e+06	1.34434e+06	2.34042e+06	274040	1.33039e+06	4.33617e+06	2.57729e+06	5.34787e+06	2.5853e+06	2.18239e+06	1.45488e+06	349314	207676	160586	3.08222e+06	3.2025e+06	728054		157832
	Other		Granzyme A OS=Homo sapiens OX=9606 GN=GZMA PE=1 SV=2	GZMA	P12544	18.664	19	4	18	4	262	29	7294		4			3.908e+06	138722	1.24585e+06	1.80437e+06	391289	142727	3.74152e+06	2.17577e+06	3.5456e+06	1.12817e+06		242344	294066	150463	190052	9.99458e+06	7.57668e+06	921676	2.3205e+06	138874	3.44127e+06	5.0711e+06	449269	1.99787e+06	7.03374e+06	5.09011e+06	1.21845e+06
	Other		Granzyme K OS=Homo sapiens OX=9606 GN=GZMK PE=1 SV=1	GZMK	P49863	39.491	26	6	16	6	264	28.9	7096		6			194594		1.8214e+06	945919	1.64878e+06	324450	1.43171e+06	357548	2.64149e+06	33861.1	1.87593e+06		198147	1.65192e+06	360262	4.23088e+06	725476	1.70089e+06	2.38818e+06	1.19871e+06	1.58192e+06	4.59104e+06	662792	967939	6.49865e+06	6.20511e+06	2.94164e+06
	Other		Histone H1.0 OS=Homo sapiens OX=9606 GN=H1-0 PE=1 SV=3	H1F0	P07305	10.518	17	3	3	3	194	20.9	912	2.59	2	1	Met-loss+Acetyl [N-Term]						4.84801e+06		224318							556141								186369
	Other		Histone H3.3 OS=Homo sapiens OX=9606 GN=H3-3A PE=1 SV=2	H3F3A; H3F3AP4; H3F3B	P84243	101.315	50	11	300	11	136	15.3	179506		11			5.8068e+06	3.90219e+07	3.8014e+07	3.39961e+07	2.98291e+07	3.12541e+07	7.80388e+07	1.51263e+07	2.6009e+07	5.55238e+07	3.26519e+07	1.81036e+07	4.56846e+07	6.04549e+07	1.49204e+07	4.89312e+07	9.20592e+07	1.37921e+07	2.51282e+07	3.54912e+07	4.68984e+07	2.84473e+07	4.45679e+07	8.71016e+07	9.39228e+06	1.23091e+07	1.63063e+07
	Other		Trifunctional enzyme subunit alpha, mitochondrial OS=Homo sapiens OX=9606 GN=HADHA PE=1 SV=2	HADHA	P40939	23.508	7	4	17	4	763	82.9	6931		4				2.47316e+06	1.97502e+06	1.2845e+06	1.74722e+06	185345	2.29826e+06	2.00353e+06	1.70589e+06	2.29853e+06	1.3417e+06	452265		2.32097e+06	749988	1.92296e+06	2.65262e+06		634772	2.96147e+06	556538		447653	1.34715e+06	2.17268e+06	797963	1.32709e+06
	Other		Hemoglobin subunit alpha OS=Homo sapiens OX=9606 GN=HBA1 PE=1 SV=2	HBA2; HBA1	P69905	123.057	83	9	173	9	142	15.2	74728		9			3.26166e+07	6.9361e+06	6.99931e+06	3.66486e+07	4.37691e+06	4.87895e+06	2.92285e+06	1.73263e+06	1.53197e+06	6.25909e+06	9.83849e+06	1.60799e+07	2.09171e+07	8.39573e+06	1.72307e+06	6.50793e+06	1.13541e+06	2.2989e+06	1.78134e+07	1.00459e+07	1.32457e+07	1.75413e+07	7.28728e+06	7.59856e+06	9.32215e+06	4.2673e+06	9.3802e+06
	Other		Hemoglobin subunit beta OS=Homo sapiens OX=9606 GN=HBB PE=1 SV=2	HBB	P68871	114.156	82	13	272	7	147	16	137347		13			5.3524e+07	2.52572e+07	3.88836e+07	3.29138e+07	2.10873e+07	2.07333e+07	1.63262e+07	1.01433e+07	2.36276e+07	3.74484e+07	3.03952e+07	6.01388e+07	3.15888e+07	3.74405e+07	1.88342e+07	2.1611e+07	1.6475e+07	2.46063e+07	5.15499e+07	2.51058e+07	4.85167e+07	2.07936e+07	2.04458e+07	3.15999e+07	2.45521e+07	2.15972e+07	2.84905e+07
	Other		Vigilin OS=Homo sapiens OX=9606 GN=HDLBP PE=1 SV=2	HDLBP	Q00341	13.976	2	2	2	2	1268	141.4	1264		2								42257.2																402424		1.99971e+06
	Other		Protein HID1 OS=Homo sapiens OX=9606 GN=HID1 PE=1 SV=1	HID1	Q8IV36	4.022	3	2	2	2	788	88.7	431		2			5.92054e+06	1.0365e+08	6.39282e+07	1.98184e+07	7.19154e+07	1.09136e+06	2.4819e+07	3.10264e+06	6.31259e+06		5.81672e+07	4.15694e+07	7.55172e+07	4.62517e+07	1.17687e+07	9.86605e+07	1.62789e+07	6.83201e+06	567645		452354
	Other		HIG1 domain family member 1A, mitochondrial OS=Homo sapiens OX=9606 GN=HIGD1A PE=1 SV=1	HIGD1A	Q9Y241	13.795	44	2	9	2	93	10.1	597	13.29	1	1	Met-loss+Acetyl [N-Term]	1.31767e+06	573550	348210	343701	334629	867876	1.95244e+06			901966	387260	390408	457730	1.44271e+06	1.44789e+06	2.20434e+06	9.00079e+06	321037	736566	2.42962e+06	614995	3.33129e+06	485172		173664	540776	277066
	Other		Histone H1.3 OS=Homo sapiens OX=9606 GN=H1-3 PE=1 SV=2	HIST1H1D	P16402	40.006	15	5	31	5	221	22.3	13474		5			1.15616e+06	389884	666598	128464		2.6444e+07	1.28388e+06	266196		1.82272e+06	2.23932e+06	477667	2.66991e+06	1.86152e+06	5.00298e+06	243260	7.02892e+06	2.34095e+06	1.05657e+06	3.34337e+06		1.23499e+06	1.9028e+06	2.88478e+06	544582	1.37326e+06	542734
	Other		Histone H4 OS=Homo sapiens OX=9606 GN=H4C1 PE=1 SV=2	HIST1H4A; HIST1H4F; HIST1H4D; HIST1H4J; HIST2H4A; HIST2H4B; HIST1H4H; HIST1H4C; HIST4H4; HIST1H4E; HIST1H4I; HIST1H4B; HIST1H4K; HIST1H4L	P62805	70.843	46	10	320	10	103	11.4	153651		10			1.47104e+07	1.08822e+07	1.608e+07	1.27543e+07	1.66401e+07	8.89894e+07	6.74348e+07	1.08024e+07	2.38353e+07	3.96538e+07	9.87077e+06	1.30495e+07	2.98329e+07	7.05539e+07	3.40804e+07	4.19447e+07	3.41531e+07	1.90092e+07	3.21751e+07	3.78396e+07	5.8158e+07	1.77304e+07	8.26836e+07	1.21179e+08	1.65207e+07	8.07419e+06	1.80247e+07
	Other		Histone H2A type 2-B OS=Homo sapiens OX=9606 GN=H2AC21 PE=1 SV=3	HIST2H2AB	Q8IUE6	139.974	47	11	148	6	130	14	71049		11			5.59577e+06	5.90717e+06	6.4034e+06	3.15774e+06	4.72267e+06	1.30254e+07	8.19799e+06	3.38447e+06	7.44513e+06	1.5205e+07	6.53022e+06	7.33406e+06	4.94379e+06	2.32253e+07	3.27654e+06	2.28181e+06	1.00521e+07	3.31825e+06	3.83723e+06	7.62376e+06	3.42411e+07	4.19902e+06	7.22387e+06	1.91358e+07	1.05126e+07	5.68099e+06	3.33462e+06
	Other		HLA class I histocompatibility antigen, A alpha chain OS=Homo sapiens OX=9606 GN=HLA-A PE=1 SV=2	HLA-A	P04439	148.722	40	19	354	9	365	40.8	171985	3.53	19	1		2.08417e+07	2.79503e+07	7.95022e+07	2.10196e+07	7.02234e+07	1.22252e+07	1.32712e+07	2.16303e+07	9.72396e+06	5.24666e+06	2.44225e+06	5.92924e+06	1.79674e+07	1.48362e+07	4.35914e+06	1.49653e+07	1.26763e+07	1.10102e+07	1.58216e+07	8.35277e+06	1.6773e+08	9.74113e+07	1.14328e+07	4.71266e+07	2.23472e+07	6.00049e+07	2.32765e+07
	Other		HLA class I histocompatibility antigen, B alpha chain OS=Homo sapiens OX=9606 GN=HLA-B PE=1 SV=3	HLA-B	P01889	178.414	38	23	429	9	362	40.4	212436		23			1.2595e+08	4.72013e+07	5.84424e+07	2.71384e+07	8.94808e+07	8.47308e+06	3.5052e+07	1.78386e+08	6.70145e+07	5.92421e+07	2.12198e+07	2.5572e+07	4.85837e+07	3.37668e+07	1.01963e+07	5.25858e+07	1.20926e+08	5.08462e+07	9.18408e+07	5.35588e+07	1.1601e+08	1.56586e+08	8.44887e+07	2.62339e+08	7.00173e+07	4.21796e+08	1.40964e+08
	Other		HLA class II histocompatibility antigen, DP alpha 1 chain OS=Homo sapiens OX=9606 GN=HLA-DPA1 PE=1 SV=1	HLA-DPA1	P20036	36.581	14	3	36	3	260	29.4	20978		3			1.05978e+06	3.79091e+06	4.12261e+06	7.27741e+06	4.32802e+06	591975	1.0502e+06	9.10098e+06	2.68374e+06	53175.6	2.84351e+06	5.50136e+06	1.7404e+06	819525		5.39293e+06	2.69511e+06	2.55944e+06	3.66028e+06	6.96274e+06	1.26895e+06	1.63633e+07	918434	4.39906e+07	2.81238e+06	1.94549e+06	8.45702e+06
	Other		HLA class II histocompatibility antigen, DP beta 1 chain OS=Homo sapiens OX=9606 GN=HLA-DPB1 PE=1 SV=1	HLA-DPB1	P04440	30.682	14	5	121	4	258	29.1	61286		5			1.07442e+07	1.62708e+07	1.01826e+07	2.315e+07	1.48603e+07	4.48167e+06	2.23207e+07	1.57805e+07	7.78908e+06	3.55423e+06	2.05172e+07	2.92667e+07	1.36419e+07	325530	9.32947e+06	3.49836e+07	5.57894e+06	1.0829e+07	9.57064e+06	1.70186e+07	2.58084e+07	3.37734e+07	1.30062e+07	2.82028e+07	2.70711e+07	1.43818e+07	1.64758e+07
	Other		HLA class II histocompatibility antigen, DQ beta 1 chain OS=Homo sapiens OX=9606 GN=HLA-DQB1 PE=1 SV=2	HLA-DQB1	P01920	28.271	21	5	9	5	261	30	4439		5			334243				667717	205568		4.59775e+06	4.1774e+06			2.71535e+06	861479	1.13434e+06	1.72433e+06	629413	2.23233e+06	517462	3.05738e+06		724817	8.98634e+06	1.38727e+06	1.0943e+06	4.0247e+06	4.73178e+06	5.62466e+06
	Other		HLA class II histocompatibility antigen, DR alpha chain OS=Homo sapiens OX=9606 GN=HLA-DRA PE=1 SV=1	HLA-DRA	P01903	156.176	44	13	318	12	254	28.6	174410		13			6.45982e+07	1.68146e+07	4.32161e+07	1.79301e+07	6.13151e+07	4.04493e+06	2.36328e+07	6.37812e+07	3.79187e+07	2.07871e+07	2.43405e+07	5.40532e+07	2.19501e+07	1.88037e+07	4.373e+06	7.79088e+07	2.07101e+07	4.04269e+07	1.16959e+08	3.68707e+07	2.00778e+07	1.01608e+08	9.61613e+06	3.76134e+07	1.54704e+08	3.99183e+07	8.81542e+07
	Other		HLA class II histocompatibility antigen, DR beta 3 chain OS=Homo sapiens OX=9606 GN=HLA-DRB3 PE=1 SV=1	HLA-DRB3	P79483	92.221	36	10	129	3	266	29.9	59715	4.05	9	1		2.8371e+07	1.60236e+07	2.09686e+07	6.66434e+06	5.43209e+07	2.50957e+07	4.92971e+07	2.5736e+07	3.04071e+07	1.30317e+07	1.82031e+07	2.26397e+07	8.37726e+06	2.3897e+07	2.86595e+07	8.519e+07	4.6587e+06	3.63861e+07	7.09922e+07	3.79961e+07	2.11615e+07	4.38376e+07	1.93741e+07	2.76898e+07	9.74495e+07	3.15202e+07	7.52136e+07
	Other		HLA class II histocompatibility antigen, DR beta 4 chain OS=Homo sapiens OX=9606 GN=HLA-DRB4 PE=1 SV=2	HLA-DRB4	P13762	43.701	28	6	65	2	266	29.9	29048	4.05	5	1			2.81078e+06	3.16631e+06	336375	1.88191e+06	18982.7	504801	3.56809e+06	3.02293e+06		1.11054e+06	2.15661e+06	4.21719e+06	856272		1.20321e+06	672619	2.3e+06	712493	1.70598e+06	1.44101e+06	1.08282e+06	840066			8.84409e+06	4.0223e+06
	Other		HLA class II histocompatibility antigen, DR beta 5 chain OS=Homo sapiens OX=9606 GN=HLA-DRB5 PE=1 SV=1	HLA-DRB5	Q30154	100.66	42	10	128	3	266	30	54324	4.05	9	1			950649	553215	227706	306974	27796.9		979060		436256	782742	337534	416952	324831	557131	998810	587990		391755	793225	266598	4.03908e+06	487139	323217		1.57242e+06	160259
	Other		HLA class I histocompatibility antigen, alpha chain F OS=Homo sapiens OX=9606 GN=HLA-F PE=1 SV=3	HLA-F	P30511	14.209	15	4	7	3	346	39	2863		4			2.93561e+06	1.54968e+06	667821		302776	208197	76993.2	224435	1.04695e+06	475618	946619		2.16482e+06	833366	379703	225792	1.17197e+06	2.9915e+06	360639	724957	267024	282554	620286	2.21056e+06	251192	1.96607e+06	1.34017e+06
	Other		Minor histocompatibility antigen H13 OS=Homo sapiens OX=9606 GN=HM13 PE=1 SV=1	HM13	Q8TCT9	52.618	18	7	53	7	377	41.5	30778		7			1.37948e+06	2.92579e+06	798831	1.37067e+06	1.42874e+06	1.86326e+06	1.89412e+06	488154	687504	2.38547e+06	844305	1.07823e+07	6.46183e+06	7.27103e+06	1.98221e+06	6.72262e+06	1.27119e+07	2.27568e+06	5.64669e+06	1.06154e+07	6.77155e+06	3.54457e+06	2.17508e+06	6.23745e+06	1.99447e+06	2.71965e+07	3.14645e+07
	Other		Hydroxymethylglutaryl-CoA synthase, mitochondrial OS=Homo sapiens OX=9606 GN=HMGCS2 PE=1 SV=1	HMGCS2	P54868	8.883	5	2	2	2	508	56.6	1013		2			3.51597e+06	548582	793440		927748	44873.9	3.14917e+06		1.64266e+06			419968							298934		187798				332012	439692
	Other		Heterogeneous nuclear ribonucleoprotein A0 OS=Homo sapiens OX=9606 GN=HNRNPA0 PE=1 SV=1	HNRNPA0	Q13151	11.557	10	2	2	2	305	30.8	1012		2									160103																407868	637009
	Other		Heterogeneous nuclear ribonucleoprotein A1-like 2 OS=Homo sapiens OX=9606 GN=HNRNPA1L2 PE=2 SV=2	HNRNPA1L2	Q32P51	20.555	9	3	15	2	320	34.2	6653		3				360186	361619		197519	1.11752e+06	598101						273349		1.19857e+06	302878		35177.7	451672	555940		331054		1.52132e+07		274369	1.32722e+06
	Other		Heterogeneous nuclear ribonucleoproteins A2/B1 OS=Homo sapiens OX=9606 GN=HNRNPA2B1 PE=1 SV=2	HNRNPA2B1	P22626	49.804	23	8	39	7	353	37.4	17329		8			508745	1.68087e+06	1.35929e+06	3.94824e+06	2.15424e+06	5.72141e+06	2.73921e+06	718264	734464	1.51e+06	2.49061e+06	8.02137e+06	2.45775e+06	3.26675e+06	5.93511e+06	3.89455e+06	2.57185e+06	3.34634e+06	8.49873e+06	1.45939e+07	5.61125e+06	2.55668e+06	8.65877e+06	5.96807e+07	3.14336e+06	2.3281e+06	2.86349e+06
	Other		Heterogeneous nuclear ribonucleoproteins C1/C2 OS=Homo sapiens OX=9606 GN=HNRNPC PE=1 SV=4	HNRNPC	P07910	50.057	24	8	29	8	306	33.7	10820		8			2.36695e+06	470205	168490	356758	181462	4.02042e+06	1.17185e+06	387407	33550.9	97427.3	1.04587e+06	2.5538e+06	1.59081e+06	1.43511e+06	556132	1.24893e+06	361525	1.21608e+06	2.13919e+06	1.63902e+06	1.59074e+06	1.03249e+06	1.95111e+06	5.80684e+07	80467.8	935062	3.09841e+06
	Other		Heterogeneous nuclear ribonucleoprotein D0 OS=Homo sapiens OX=9606 GN=HNRNPD PE=1 SV=1	HNRNPD	Q14103	16.313	12	4	40	4	355	38.4	21066		4			695998	251040	473363	1.18951e+06	2.18008e+06	442857	1.1276e+06	377488	144425	4.35763e+06	2.32552e+06	732171	857241	1.38983e+06	1.95449e+06	1.46413e+06	1.02773e+06	372619	1.18809e+06	1.62624e+06	635291		777046	1.62957e+07
	Other		Heterogeneous nuclear ribonucleoprotein F OS=Homo sapiens OX=9606 GN=HNRNPF PE=1 SV=3	HNRNPF	P52597	19.512	9	2	2	2	415	45.6	1267		2				288074	310872	302729	286283	96089.3	596739	546386	844507			905832		422276	731248					212200	316169		573733	2.87537e+06	908463	282374	223740
	Other		Heterogeneous nuclear ribonucleoprotein K OS=Homo sapiens OX=9606 GN=HNRNPK PE=1 SV=1	HNRNPK	Q00839	30.02	8	6	19	6	825	90.5	9107		6			8.3462e+06	1.76122e+06	653222	2.0202e+06	1.75281e+06	8.36338e+06	5.05872e+06	451031	224695	3.35059e+06	4.89118e+06	4.05256e+06	4.63242e+06	9.39278e+06	1.19144e+07	2.8857e+06	4.69878e+06	5.24833e+06	6.65577e+06	1.75123e+06	3.39428e+06	3.73878e+06	4.18779e+06	3.26092e+07	2.47454e+06	6.57057e+06	812247
	Other		Heterogeneous nuclear ribonucleoprotein M OS=Homo sapiens OX=9606 GN=HNRNPM PE=1 SV=3	HNRNPM	Q9BUJ2	3.991	1	1	2	1	856	95.7	1183		1									815757			838928				848714	156640	162767			142459				615019	3.44226e+06
	Other		Heterogeneous nuclear ribonucleoprotein U OS=Homo sapiens OX=9606 GN=HNRNPU PE=1 SV=6	HNRNPU	Q1KMD3	2.229	2	1	1	1	747	85.1	270		1			413079	813258	303361	485533	72870.1	1.23473e+06	2.83134e+06	462926		1.08526e+06			1.87296e+06	2.20063e+06	1.18088e+06	1.07385e+06	1.82522e+06	90248.4	5.15642e+06	1.5374e+06		1.68658e+06	1.28109e+06	5.83896e+06	158964
	Other		Haptoglobin OS=Homo sapiens OX=9606 GN=HP PE=1 SV=1	HP	P00738	30.469	19	6	14	6	406	45.2	4240		6			8.38075e+06	343368	4.92346e+06	1.24502e+06	449309	2.23003e+07	1.49137e+06	3.29992e+07	2.33704e+07	79142.7	3.44584e+06		1.12928e+06	3.0926e+06	1.5938e+06	263114	8.74692e+06	5.60049e+06		286202	622624		449891	1.06226e+06	631300	2.45391e+06	873083
	Other		3-hydroxyacyl-CoA dehydrogenase type-2 OS=Homo sapiens OX=9606 GN=HSD17B10 PE=1 SV=3	HSD17B10	Q99714	8.017	10	2	2	2	261	26.9	829		2									1.25445e+06	201486							728443	943751		130811						3.05662e+06
	Other		Estradiol 17-beta-dehydrogenase 11 OS=Homo sapiens OX=9606 GN=HSD17B11 PE=1 SV=3	HSD17B11	Q8NBQ5	15.825	8	2	4	2	300	32.9	1982		2									1.38393e+06							1.00883e+06		1.13275e+06				1.51945e+06	671199			1.88991e+06			2.24289e+06
	Other		Very-long-chain 3-oxoacyl-CoA reductase OS=Homo sapiens OX=9606 GN=HSD17B12 PE=1 SV=2	HSD17B12	Q53GQ0	26.777	16	5	8	5	312	34.3	3372		5					72779.4		206790	102940	3.64194e+06				183107		302294	551232		803306	674498	897735	4.04129e+07	378217	1.93098e+08		347046	4.64311e+06	474134		54319
	Other		Heat shock protein HSP 90-alpha OS=Homo sapiens OX=9606 GN=HSP90AA1 PE=1 SV=5	HSP90AA1	P07900	46.798	11	7	22	2	732	84.6	10097		7				110636				123077	20092.2	87970.3			61999.2				267564	207008	628486		23904.6	4467.55		149778	191036	506164	449031	579276
	Other		Heat shock protein HSP 90-beta OS=Homo sapiens OX=9606 GN=HSP90AB1 PE=1 SV=4	HSP90AB1	P08238	69.131	15	9	33	3	724	83.2	14796		9			2.15848e+07	2.06807e+06	1.10442e+06	3.18486e+06	1.78995e+06	691773	2.49947e+06	2.15345e+06	918658	5.96837e+06	2.93365e+06	1.34829e+06	1.54418e+06	4.9337e+06	2.21563e+06	2.6737e+06	3.92549e+06	1.98377e+06	2.87489e+06	3.33371e+06	433591	1.52091e+06	3.71644e+06	1.80517e+07	5.28765e+06	4.48081e+06	5.95673e+06
	Other		Endoplasmin OS=Homo sapiens OX=9606 GN=HSP90B1 PE=1 SV=1	HSP90B1	P14625	29.973	8	6	48	5	803	92.4	19249		6			5.10232e+06	3.4081e+06	2.79437e+06	1.82729e+06	4.90172e+06	303408	2.43948e+06	732656	2.18218e+06	1.57563e+07	2.76298e+06	1.06912e+07	1.33714e+07	5.35417e+06	494601	3.66516e+06	2.28287e+06	2.19665e+06	4.92088e+06	3.90777e+06	2.06693e+06	3.39728e+06	2.89648e+06	2.16008e+06	887900	718325	3.36883e+06
	Other		Heat shock 70 kDa protein 1B OS=Homo sapiens OX=9606 GN=HSPA1B PE=1 SV=1	HSPA1B; HSPA1A	P0DMV9	19.247	6	3	15	2	641	70	7363		3				244064				3.46684e+06		44116.4	177946	463329								378751				175986			37580		757594
	Other		Endoplasmic reticulum chaperone BiP OS=Homo sapiens OX=9606 GN=HSPA5 PE=1 SV=2	HSPA5	P11021	36.384	9	5	26	4	654	72.3	13302		5			2.33399e+06	4.29013e+06	1.74063e+06	2.40704e+06	7.32969e+06	4.70827e+06	1.7994e+07	3.0598e+06	927876	2.07256e+06	7.60836e+06	3.1655e+07	3.0251e+06	3.00304e+06	2.45813e+06	6.89572e+07	4.03897e+07	2.3049e+06	2.48639e+07	1.10585e+07	3.68841e+06	2.65442e+06	6.23526e+06	7.1051e+06	654669	2.39167e+06	3.79575e+06
	Other		Heat shock protein beta-1 OS=Homo sapiens OX=9606 GN=HSPB1 PE=1 SV=2	HSPB1	P04792	109.2	56	11	83	11	205	22.8	42646		11			2.55401e+06	2.03805e+06	1.57793e+06	5.01793e+06	2.07387e+06	1.42164e+08	1.5673e+07	1.44845e+06	1.50581e+06	3.33692e+06	4.7244e+06	452285	3.74171e+06	9.73105e+06	3.20713e+07	2.89466e+06	7.91393e+06	1.33838e+06	826250	2.21154e+06	456147	867040	1.15527e+06	2.41025e+07	1.77656e+06	837096	984097
	Other		Heat shock protein beta-6 OS=Homo sapiens OX=9606 GN=HSPB6 PE=1 SV=2	HSPB6	O14558	46.617	40	5	36	5	160	17.1	17565		5				160548	344709	459482	740446	1.20967e+08	6.61155e+06	76887.9	311212	1.99322e+06	1.3312e+06		340327	2.96142e+06	4.8125e+07	1.46822e+06	221225	301884	853993	1.34555e+06	175080	174497	346232	1.81719e+06		875183
	Other		60 kDa heat shock protein, mitochondrial OS=Homo sapiens OX=9606 GN=HSPD1 PE=1 SV=2	HSPD1	P10809	9.552	4	2	4	2	573	61	1948		2							215661	106205	803823			2.22152e+06	205204				286827	1.08027e+06	1.21841e+06			356292			742104	2.03374e+06			464239
	Other		Isoleucine--tRNA ligase, mitochondrial OS=Homo sapiens OX=9606 GN=IARS2 PE=1 SV=2	IARS2	Q9NSE4	5.375	2	2	40	2	1012	113.7	16074		2			756757	443612		1.29021e+07	1.69695e+07	181821	1.37944e+07	5.75918e+07	496310		2.89266e+07	1.03731e+06	2.28101e+07	1.85691e+07	122580	845416	1.03719e+08	8.62467e+07	3.3197e+07	5.28861e+07	2.29719e+07	4.83514e+07	3.12976e+07	1.43442e+07		2.15098e+07	1.50296e+07
	Other		Isocitrate dehydrogenase [NADP], mitochondrial OS=Homo sapiens OX=9606 GN=IDH2 PE=1 SV=2	IDH2	P48735	118.509	38	16	72	15	452	50.9	38703		16			1.66551e+06	2.87653e+07	2.77678e+07	9.2925e+06	6.22159e+06	2.15433e+07	4.73936e+07	4.06373e+06	1.90703e+07	8.47241e+07	6.00592e+06	6.47971e+06	8.08744e+06	8.56704e+06	1.66423e+07	1.92337e+07	3.07946e+07	3.01049e+07	1.17403e+07	5.79806e+06	4.13785e+06	8.69097e+06	1.10122e+07	1.96911e+07	1.63391e+07	1.68966e+07	4.13083e+07
	Other		Immediate early response 3-interacting protein 1 OS=Homo sapiens OX=9606 GN=IER3IP1 PE=1 SV=1	IER3IP1	Q9Y5U9	18.712	34	2	2	2	82	9	1327		2						464352			315751				650101		391256	256568		874170	937012	494844			352462		320250	2.33777e+06		121719	4.8754e+06
	Other		Interferon-induced protein with tetratricopeptide repeats 3 OS=Homo sapiens OX=9606 GN=IFIT3 PE=1 SV=1	IFIT3	O14879	6.714	6	2	2	2	490	56	638		2			5.68051e+06	1.80556e+07	2.61659e+07	8.82246e+06	3.83136e+06			2.42657e+07	1.76115e+07		312568	9.06447e+06	1.02278e+07	4.29852e+06	764921	3.02513e+06	8.88768e+06		4.95098e+06	9.94931e+06	159662	1.80139e+06		580452			7.34173e+06
	Other		Immunoglobulin heavy constant alpha 1 OS=Homo sapiens OX=9606 GN=IGHA1 PE=1 SV=2	IGHA1	P01876	263.755	61	29	782	16	353	37.6	357920		29			1.16322e+08	1.02965e+08	2.06079e+08	4.78582e+07	1.33475e+08	2.28438e+07	1.5726e+08	1.37093e+08	1.19121e+08	7.87183e+07	1.01763e+08	6.87558e+07	5.73305e+07	9.20452e+07	4.27551e+07	1.69223e+08	1.6673e+08	1.05844e+08	3.37966e+07	1.01252e+08	6.26863e+07	4.02731e+07	2.02924e+07	1.14806e+07	1.6812e+08	1.12165e+08	3.51715e+07
	Other		Immunoglobulin heavy constant alpha 2 OS=Homo sapiens OX=9606 GN=IGHA2 PE=1 SV=4	IGHA2	P01877	116.725	36	15	294	2	340	36.6	129220		15			470061	3.56869e+06	276852	1.38055e+06	4.43055e+06	2.35332e+06	7.32845e+06	2.45863e+06	5.4253e+06	6.6715e+06	5.44621e+06		1.84394e+06	2.8106e+06	4.9373e+06	3.33311e+06	3.45401e+06	9.69602e+06	731257	2.9403e+06	399067	1.36182e+06		221894	8.55832e+06	1.2376e+06	1.59425e+06
	Other		Immunoglobulin heavy constant gamma 1 OS=Homo sapiens OX=9606 GN=IGHG1 PE=1 SV=1	IGHG1	P01857	387.369	70	31	1205	14	330	36.1	597479		31			6.20577e+08	7.46182e+07	1.08719e+08	8.34671e+07	7.76071e+07	7.42023e+07	1.75165e+08	1.19163e+08	1.38229e+08	3.04847e+08	1.19241e+08	8.42925e+08	8.32692e+07	7.98335e+07	1.14305e+08	1.25038e+08	1.57634e+08	1.26898e+08	4.74054e+08	1.50522e+08	3.29201e+08	7.77183e+07	4.99878e+07	2.89192e+08	4.21456e+08	2.31386e+08	1.40309e+08
	Other		Immunoglobulin heavy constant gamma 3 OS=Homo sapiens OX=9606 GN=IGHG3 PE=1 SV=2	IGHG3	P01860	177.039	53	24	939	4	377	41.3	426323		24			3.21515e+06	3.44914e+07	1.69509e+07	1.32737e+07	3.11354e+07	4.5871e+06	8.87643e+06	1.17562e+07	8.98928e+07	2.8934e+06	1.19842e+07	3.39868e+07	1.69072e+07	1.28904e+07	1.73011e+07	5.3215e+06	1.73949e+07	9.0762e+06	2.6042e+07	1.68873e+07	1.84205e+07	5.88737e+06	2.17e+07	3.60209e+07	6.95179e+06	9.88492e+06	9.59335e+06
	Other		Immunoglobulin heavy constant gamma 4 OS=Homo sapiens OX=9606 GN=IGHG4 PE=1 SV=1	IGHG4	P01861	126.318	41	15	459	2	327	35.9	190633		15			475611				1.299e+06	1.01044e+06		1.24323e+06	2.51843e+06			467101	305242	1.63556e+06	329888	178766	418058		3.57328e+06	2.36822e+06	1.59963e+06	2.69657e+06		296948		291448	1.29255e+06
	Other		Immunoglobulin heavy constant mu OS=Homo sapiens OX=9606 GN=IGHM PE=1 SV=4	IGHM	P01871	334.332	55	27	1098	27	453	49.4	561673	2.2	26	1		6.14811e+08	6.11288e+07	7.39784e+07	6.99328e+07	6.92995e+07	3.65785e+07	1.43218e+08	7.24282e+07	9.77238e+07	5.79641e+09	1.29202e+08	8.27846e+07	1.65232e+08	8.34356e+07	1.78984e+08	2.52563e+08	2.41049e+08	1.31802e+08	7.78316e+08	1.20771e+08	9.14828e+07	2.22252e+07	3.69101e+07	2.16831e+08	1.53456e+08	2.0246e+08	3.02764e+08
	Other		Immunoglobulin heavy variable 1-2 OS=Homo sapiens OX=9606 GN=IGHV1-2 PE=1 SV=2	IGHV1OR15-1	P23083	22.957	20	2	80	2	117	13.1	42449		2			3.26003e+06	1.77323e+06	2.66202e+06	4.25736e+06	5.09461e+06	2.11165e+06	3.74897e+06	3.39448e+06	2.44903e+06	1.13482e+07	2.65686e+06	3.87767e+07	3.5037e+06	3.70651e+06	5.16254e+06	4.15287e+06	2.05449e+07	2.49868e+06	2.11982e+07	1.04999e+07	7.92738e+06	1.2255e+06	1.55921e+06	6.86571e+06	1.09144e+07	6.54548e+06	4.28187e+06
	Other		Immunoglobulin heavy variable 3-15 OS=Homo sapiens OX=9606 GN=IGHV3-15 PE=3 SV=1	IGHV3-15	A0A0B4J1V0	62.644	37	5	32	4	119	12.9	13470		5			1.75331e+06			404637	1.3571e+06	1.56384e+06	3.3191e+06		585908	1.61846e+07	587645	588097	1.37968e+06	253561	2.41176e+06	3.18806e+06	4.22232e+06	834077	1.12384e+07	2.31587e+06		142431	634767	4.23117e+06	2.88569e+06		3.34135e+06
	Other		Immunoglobulin heavy variable 3-33 OS=Homo sapiens OX=9606 GN=IGHV3-33 PE=1 SV=2	IGHV3-33	P01772	32.827	44	6	13	2	117	13.1	5979		6			551473	205750	567601	264442	973977	161011		1.09614e+06	432704	1.58611e+06	1.42738e+06	150790		526980	629713	9.70465e+06		1.08854e+06	4.35386e+06	1.14211e+06	1.49343e+06	691065	340075	2.72396e+06	2.00647e+06
	Other		Immunoglobulin heavy variable 3-53 OS=Homo sapiens OX=9606 GN=IGHV3-53 PE=1 SV=2	IGHV3-53	P01767	27.43	47	6	11	2	116	12.8	4525		6												898310
	Other		Immunoglobulin heavy variable 3-7 OS=Homo sapiens OX=9606 GN=IGHV3-7 PE=1 SV=2	IGHV3-7	P01780	83.501	38	7	87	5	117	12.9	42404		7			2.86186e+06	3.17216e+06	990763	524492	3.12679e+06	3.36729e+06	4.71788e+06	2.99809e+06	2.7732e+06	1.22215e+08	374991	3.41418e+07	1.52093e+06	2.56892e+06	4.22022e+06	2.63083e+06	6.58701e+06	2.05489e+06	1.15357e+07	1.1211e+07	3.70946e+06	1.19573e+06	1.26031e+06	4.46856e+06	2.39414e+06	427036	2.87181e+06
	Other		Immunoglobulin heavy variable 3-9 OS=Homo sapiens OX=9606 GN=IGHV3-9 PE=1 SV=2	IGHV3-9	P01782	18.971	19	3	17	2	118	12.9	6474		3			2.79264e+06					150259						578450	575684	244115	233086	324280	422710	624879	1.10708e+06			653906		633540	666983		535171
	Other		Immunoglobulin J chain OS=Homo sapiens OX=9606 GN=JCHAIN PE=1 SV=4	IGJ; JCHAIN	P01591	66.402	64	8	131	8	159	18.1	59711	8.37	7	1		2.32614e+07	1.08576e+07	1.4988e+07	3.28424e+06	1.69713e+07	3.21316e+06	1.53447e+07	1.82293e+07	1.85748e+07	1.40155e+08	1.29806e+07	9.16809e+06	4.12449e+06	1.23131e+07	6.14473e+06	2.17246e+07	4.18413e+07	1.88321e+07	6.07703e+07	1.53006e+07	4.13406e+06	935047	1.38437e+06	4.62217e+06	1.91345e+07	6.52027e+06	9.32523e+06
	Other		Immunoglobulin kappa constant OS=Homo sapiens OX=9606 GN=IGKC PE=1 SV=2	IGKC	P01834	299.883	88	21	1178	21	107	11.8	613124		21			3.19801e+08	1.23303e+08	1.70958e+08	8.22357e+07	1.16272e+08	4.24401e+07	1.38871e+08	1.20047e+08	2.13514e+08	1.4266e+09	1.95736e+08	4.26696e+08	1.39107e+08	1.29481e+08	9.6629e+07	1.64831e+08	3.08639e+08	1.36347e+08	6.03264e+08	1.38443e+08	2.61512e+08	1.31746e+08	8.05334e+07	1.59603e+08	2.65191e+08	2.16605e+08	1.02441e+08
	Other		Immunoglobulin kappa variable 1-12 OS=Homo sapiens OX=9606 GN=IGKV1-12 PE=3 SV=1	IGKV1-12; IGKV1D-12	A0A0C4DH73	9.696	29	2	2	2	117	12.6	623		2
	Other		Immunoglobulin kappa variable 1-27 OS=Homo sapiens OX=9606 GN=IGKV1-27 PE=3 SV=1	IGKV1-27	A0A075B6S5	32.129	33	3	26	2	117	12.7	12106		3			1.47046e+06		1.11481e+06	627475	950055	408700	1.9878e+06	450308	301246	7.14695e+06	192350	2.61376e+06	1.14084e+06	710438	589720		1.0978e+06		3.04596e+06	3.68547e+06	170699	850845	414190	1.74966e+06	6.17262e+06	1.4081e+06	2.61313e+06
	Other		Immunoglobulin kappa variable 1-5 OS=Homo sapiens OX=9606 GN=IGKV1-5 PE=1 SV=2	IGKV1-5	P01602	19.742	25	2	19	2	117	12.8	8752		2					708728		686052	219993	1.43729e+06	464107	1.23078e+06	7.60335e+06	2.5893e+06	2.70165e+06	4.84058e+06	1.46945e+06	1.75812e+06	1.02676e+06	2.51879e+07	1.12615e+07	3.68266e+06	6.25023e+06	819448	1.23817e+06	1.11761e+06	2.46745e+06	2.11553e+06	8.8951e+06	2.60111e+06
	Other		Immunoglobulin kappa variable 2-40 OS=Homo sapiens OX=9606 GN=IGKV2-40 PE=3 SV=2	IGKV2-40; IGKV2D-40	A0A087WW87	13.738	36	3	26	2	121	13.3	10429		3					140935	538979	1.22535e+06					1.61553e+07	214611	1.32097e+07	310793	527215	520482	2.22664e+06	68154.4	143520		4.57478e+06			208272	2.0728e+06			1.10865e+06
	Other		Immunoglobulin kappa variable 3-15 OS=Homo sapiens OX=9606 GN=IGKV3-15 PE=1 SV=2	IGKV3-15	P01624	29.791	42	4	11	4	115	12.5	4107		4			8.09632e+06		2.16152e+06		172297			337527	2.62057e+06	3.94269e+06	343879	364414	923934	398979			1.06087e+06	435365	896139	251535	354973	1.67194e+06	370397	102651	1.22312e+07	1.38167e+06	150005
	Other		Immunoglobulin kappa variable 3-20 OS=Homo sapiens OX=9606 GN=IGKV3-20 PE=1 SV=2	IGKV3-20	P01619	76.33	43	8	82	8	116	12.5	37902		8			6.32386e+06	1.86373e+06	7.20002e+06	536288	1.84785e+06	2.74724e+06	2.3102e+06	3.32661e+06	1.42072e+06	4.7471e+07	2.61806e+06	4.03289e+07	2.72666e+06	6.80233e+06	2.962e+06	2.15599e+06	2.22527e+07	3.78256e+06	1.53403e+07	1.12554e+06	2.64564e+06	1.31659e+06	913103	5.29752e+06	7.65852e+06	8.23298e+06	3.37688e+06
	Other		Immunoglobulin kappa variable 3D-11 OS=Homo sapiens OX=9606 GN=IGKV3D-11 PE=3 SV=6	IGKV3D-11	A0A0A0MRZ8	26.974	23	4	34	4	115	12.6	17608		4			3.20704e+07	406657	261208	671053	746289	778725	1.10676e+06	1.12639e+06	3.87678e+06	4.4393e+06	444019	2.25054e+06	1.44469e+06	855050	1.65197e+06	1.73195e+06	1.17513e+06	1.00038e+06	4.07453e+06	1.30296e+06	2.75106e+06	450346	125479	4.5562e+06	6.37263e+06	7.41716e+06	1.76384e+06
	Other		Immunoglobulin kappa variable 4-1 OS=Homo sapiens OX=9606 GN=IGKV4-1 PE=1 SV=1	IGKV4-1	P06312	33.471	29	5	18	4	121	13.4	7216		5			9.88767e+06	9.6793e+06	181138	2.55742e+07	2.52603e+06	3.00495e+07	8.18332e+06	2731.17		3.06884e+06	5.18511e+06	1.35284e+07	2.94333e+07	8.20556e+06	4.12326e+07	6.28911e+07	5.64504e+06	286597	1.54373e+07	7.66347e+06	5.14614e+06		1.18755e+07	2.27223e+07	1.68236e+06	2.08519e+06	1.27411e+08
	Other		Immunoglobulin lambda constant 2 OS=Homo sapiens OX=9606 GN=IGLC2 PE=1 SV=1	IGLC2	P0DOY2	208.805	75	16	916	2	106	11.3	448988		16			1.22907e+08	2.29036e+07	5.49166e+06	6.98589e+06	1.85583e+07	8.38013e+06	7.26506e+06	1.03688e+06	6.58269e+07	9.84387e+07	2.25082e+07	1.57869e+07	5.78825e+06	4.47107e+06	1.12976e+07	6.8001e+06	2.74496e+07	4.1612e+07	2.41513e+07	1.95433e+07	6.04667e+06	3.69125e+06	3.65338e+06	1.17844e+07	2.74664e+07	2.15083e+07	2.00462e+07
	Other		Immunoglobulin lambda-like polypeptide 5 OS=Homo sapiens OX=9606 GN=IGLL5 PE=2 SV=2	IGLL5	B9A064	201.645	36	16	681	2	214	23	339190		16			1.31536e+08	3.28876e+08	1.35251e+08	1.30643e+08	1.44689e+08	2.5935e+07	1.18073e+08	4.0993e+08	5.62497e+08	2.17528e+08	1.79881e+08	1.1935e+08	7.60194e+07	4.17556e+07	4.80782e+07	1.67239e+08	1.75811e+08	4.0308e+08	1.26665e+08	1.35569e+08	3.2008e+07	6.13955e+07	3.17389e+07	1.41254e+08	2.3437e+08	2.42086e+08	1.66381e+08
	Other		Immunoglobulin lambda variable 1-47 OS=Homo sapiens OX=9606 GN=IGLV1-47 PE=1 SV=2	IGLV1-47	P01700	29.584	26	2	22	2	117	12.3	12817		2				2.59837e+06	1.27374e+07	1.96082e+06	5.16207e+06	258070	419888			5.11126e+07	4.41367e+06	1.45169e+06	2.74261e+06	126589	1.01634e+06	426706	1.96702e+06		1.24066e+06	830887	3.31879e+06	751180		5.45708e+06	9.76352e+06	2.23073e+06	344790
	Other		Immunoglobulin lambda variable 1-51 OS=Homo sapiens OX=9606 GN=IGLV1-51 PE=1 SV=2	IGLV1-51	P01701	17.482	26	2	19	2	117	12.2	9321		2			5.14382e+06		419593		719752	194377		630646	432275	7.37457e+06	153271	1.99587e+06	1.75016e+06	556021	434345	537401	2.7629e+06		1.68438e+06			275885		841032	2.9154e+06	1.57646e+06
	Other		Immunoglobulin lambda variable 3-19 OS=Homo sapiens OX=9606 GN=IGLV3-19 PE=1 SV=2	IGLV3-19	P01714	26.385	35	3	7	3	112	12	3179		3			120459				1.09699e+06	64077.4	575245		105981	1.02528e+06	329819			160587			908907		758261	2.44551e+06		741570	265453	2.00095e+06	1.69567e+06		473545
	Other		Immunoglobulin lambda variable 3-21 OS=Homo sapiens OX=9606 GN=IGLV3-21 PE=1 SV=2	IGLV3-21	P80748	50.733	38	4	112	4	117	12.4	54970		4				1.03702e+07	2.41005e+06	1.42861e+07	1.94034e+07	929321	5.87642e+06	1.18648e+07	4.27727e+07	709430	2.29809e+07	2.67027e+07	1.66987e+07	6.98703e+06	1.94713e+06	3.66657e+06	7.97399e+06	3.02272e+07	9.89777e+06	1.03631e+07	1.24392e+07	1.52508e+07	8.14833e+06	3.6262e+06	2.15703e+07	8.89165e+06	5.18286e+06
	Other		Putative interleukin-17 receptor E-like OS=Homo sapiens OX=9606 GN=IL17REL PE=2 SV=2	IL17REL	Q6ZVW7	8.004	14	4	26	4	336	37.5		70.18		4		7.32066e+06	4.19063e+06	1.8458e+06	853473	3.6104e+06	502911	805329	3.47136e+06	2.19392e+07		9.58988e+06		808646	774308		2.66853e+06	1.34948e+06	1.53155e+07	2.04712e+06	6.54253e+06	141628	3.25514e+06			154786	6.19293e+06	1.05312e+07
	Other		Integrin-linked protein kinase OS=Homo sapiens OX=9606 GN=ILK PE=1 SV=2	ILK	Q13418	85.314	31	13	32	13	452	51.4	15005		13			3.27486e+06	867104	1.63375e+06	549345	1.16251e+06	2.60188e+07	4.27698e+06	508859	840442	1.52759e+06	2.57635e+06	599819	130164	3.53572e+06	5.11264e+06	541355	804021	2.44655e+06	1.11433e+06	1.4222e+06	107844	666026	3.05691e+06	3.23349e+06	324575	845840	610773
	Other		Ras GTPase-activating-like protein IQGAP1 OS=Homo sapiens OX=9606 GN=IQGAP1 PE=1 SV=1	IQGAP1	P46940	8.186	2	2	2	2	1657	189.1	800		2				751632	532825	2.39862e+06			562614	972302				3.51675e+06	1.37966e+06		214397	973855	166907	1.44323e+06		1.57723e+06	1.38886e+06		393055	936215		1.11104e+06
	Other		Integrin alpha-1 OS=Homo sapiens OX=9606 GN=ITGA1 PE=1 SV=2	ITGA1	P56199	61.096	9	11	49	11	1179	130.8	25075		11			668238	4.23984e+06	974084	283621	450287	6.88487e+06	5.98722e+06	535490	1.71102e+07	9.87242e+06	2.25372e+06	417917	1.42667e+06	1.8789e+06	1.11452e+07	455075	3.92523e+06	2.11812e+06	1.12912e+06	547208	1.38062e+06	1.27266e+06	2.22419e+06	6.68635e+06	1.45945e+06	7.6822e+06	1.67276e+06
	Other		Integrin alpha-2 OS=Homo sapiens OX=9606 GN=ITGA2 PE=1 SV=1	ITGA2	P17301	51.013	10	9	22	9	1181	129.2	9607		9			318982			1.58785e+06	3.30489e+06	646347	6.17372e+06		2.3095e+06	2.24442e+06		5.64422e+06	2.07234e+06	778973	374686	4.4186e+06	2.74437e+06	1.32681e+06	1.34422e+06	5.9126e+06	629828	2.36178e+06	577592	8.04353e+06	892210	2.21739e+06	2.45335e+06
	Other		Integrin alpha-3 OS=Homo sapiens OX=9606 GN=ITGA3 PE=1 SV=5	ITGA3	P26006	40.047	7	7	54	7	1051	116.5	23634		7			747388	595502	2.05231e+06	1.44255e+07	1.18927e+07	3.34457e+06	1.80651e+07	3.85044e+06	1.88405e+06	3.49867e+06	5.61081e+06	297799	3.99198e+06	1.66363e+07	1.72702e+07	7.31653e+06	1.11384e+07	7.65011e+06	1.40881e+06	947100	6.70071e+06	1.2131e+06	744120	2.87674e+07	8.17882e+06	4.60285e+06	1.81692e+06
	Other		Integrin alpha-5 OS=Homo sapiens OX=9606 GN=ITGA5 PE=1 SV=2	ITGA5	P08648	24	3	3	9	3	1049	114.5	3553		3			485392	596396	902752	513012	2.07135e+06	1.53607e+06	4.14856e+06	351866	138775	1.40719e+06			382490	1.02703e+06	314813	1.88642e+06	1.19815e+06		777323	2.1423e+06		1.45862e+06		1.53372e+06		1.70881e+06	1.22183e+06
	Other		Integrin alpha-6 OS=Homo sapiens OX=9606 GN=ITGA6 PE=1 SV=5	ITGA6	P23229	35.134	6	6	25	6	1130	126.5	11042		6			2.37734e+06	2.22966e+06	599040	359997	1.72201e+06	899895	6.47996e+06		647340	2.1203e+06	1.0271e+06	2.18309e+06	337598	6.56839e+06	545983	8.03136e+06	6.46141e+06	464762	2.70668e+06	3.78514e+06	4.88296e+06	626528	69431.3	7.02757e+06	979922	7.74319e+06	5.10747e+06
	Other		Integrin alpha-7 OS=Homo sapiens OX=9606 GN=ITGA7 PE=1 SV=3	ITGA7	Q13683	34.191	5	5	41	5	1181	128.9	23741		5			1.40111e+06	4.72708e+07	296973	1.80396e+06	4.38853e+06	1.21388e+07	2.38464e+07	4.86703e+06	7.39067e+06	3.271e+06	1.02686e+06	6.06596e+06	2.42282e+06	4.09301e+06	3.11764e+07	4.21442e+06	8.03262e+06	5.3504e+06	7.45727e+06	2.11849e+06			4.27708e+06	3.47462e+06	2.84052e+06	3.88216e+06	115006
	Other		Integrin alpha-V OS=Homo sapiens OX=9606 GN=ITGAV PE=1 SV=2	ITGAV	P06756	38.17	8	7	12	7	1048	116	5548		7			986189		452858	633899	646230	190278	1.05908e+06	1.50017e+06	1.41119e+06	2.69018e+06	142851			491548		2.17044e+06	954040	564626	2.29206e+06	3.29874e+06		382558	109560	3.25157e+06	1.04173e+06	1.60935e+07	890061
	Other		Integrin beta-1 OS=Homo sapiens OX=9606 GN=ITGB1 PE=1 SV=2	ITGB1	P05556	262.994	37	28	499	28	798	88.4	225723	4.97	28	1		8.35928e+07	8.63875e+07	9.39318e+07	1.32054e+08	6.17775e+07	5.24201e+07	9.62486e+07	1.0308e+08	1.50987e+08	8.83671e+07	4.09795e+07	4.62777e+07	4.08692e+07	4.09054e+07	8.6906e+07	1.27904e+08	6.29605e+07	9.18473e+07	8.5563e+07	9.14884e+07	3.68758e+07	7.62876e+07	5.78994e+07	7.30584e+07	2.55993e+07	1.4825e+08	1.44725e+08
	Other		Integrin beta-2 OS=Homo sapiens OX=9606 GN=ITGB2 PE=1 SV=2	ITGB2	P05107	80.893	17	12	63	12	769	84.7	30979		12			6.6438e+06	6.73115e+06	9.62629e+06	4.25955e+06	1.4791e+07	2.40371e+06	3.99692e+06	8.30398e+06	2.32526e+07	249299	6.25171e+06	2.7045e+06	3.52716e+06	4.996e+06	1.91959e+06	6.62186e+06	1.96922e+07	4.64586e+07	1.41073e+07	9.26261e+06	2.38168e+06	2.38085e+07	5.19612e+06	3.88227e+07	5.45825e+06	4.03349e+07	2.91956e+07
	Other		Integrin beta-3 OS=Homo sapiens OX=9606 GN=ITGB3 PE=1 SV=2	ITGB3	P05106	80.735	17	10	70	10	788	87	32260		10			6.99449e+06	9.35206e+06	7.47326e+06	3.4274e+06	4.28665e+06	697301	3.14713e+06	5.17547e+06	1.51804e+07	4.85863e+06	4.7979e+06	550633	3.00099e+06	2.84147e+06	805361	5.28889e+06	3.35998e+06	1.02922e+07	7.27493e+06	3.62444e+06		3.14189e+06		5.12025e+06	529617	4.76321e+07	5.17805e+07
	Other		Integrin beta-5 OS=Homo sapiens OX=9606 GN=ITGB5 PE=1 SV=1	ITGB5	P18084	11.143	4	2	2	2	799	88	675		2						303545	237063					80820				115520	85294.7		392758		89441.8			198278		320664	164025	380652
	Other		KN motif and ankyrin repeat domain-containing protein 2 OS=Homo sapiens OX=9606 GN=KANK2 PE=1 SV=1	KANK2	Q63ZY3	17.125	6	4	27	4	851	91.1	9402		4			2.56352e+06	1.79783e+07	1.64308e+07	941527	1.30495e+07	967652	528667	5.17142e+06	4.58526e+07		7.12814e+07	1.90215e+07	9.12135e+06	2.95908e+06	895257		7.4989e+06	5.27904e+07	2.66803e+07	6.46419e+06	5.8961e+06	2.06595e+07	3.00553e+07		1.46663e+06	3.48857e+06	1.1261e+07
	Other		ER lumen protein-retaining receptor 2 OS=Homo sapiens OX=9606 GN=KDELR2 PE=1 SV=1	KDELR2	P33947	24.657	17	3	20	2	212	24.4	9798		3			1.04138e+06	1.39351e+06	348079	275147	490993	555427		3.9221e+06	1.25324e+06		449993		3.80481e+06		336026	238297	838839	89211.6	3.81257e+06	1.09637e+06	1.93195e+06	2.46293e+06	847491	118818	218225	2.12833e+06	1.64159e+07
	Other		Far upstream element-binding protein 2 OS=Homo sapiens OX=9606 GN=KHSRP PE=1 SV=4	KHSRP	Q92945	7.751	3	2	6	2	711	73.1	2832		2				81225.2				1.16643e+06						293428	309449		297850				394385			544041	326827	1.27625e+07
	Other		GTPase KRas OS=Homo sapiens OX=9606 GN=KRAS PE=1 SV=1	KRAS	P01116	15.231	14	3	4	2	189	21.6	1561		3																						271359			156304				753995
	Other		Keratin, type II cytoskeletal 1 OS=Homo sapiens OX=9606 GN=KRT1 PE=1 SV=6	KRT1	P04264	460.262	56	43	887	36	644	66	462870		43			1.91388e+08	7.34775e+07	3.33909e+07	7.40644e+07	5.69046e+07	7.30832e+07	2.02389e+08	8.91102e+08	6.28219e+08	9.30217e+07	3.78095e+07	3.26968e+07	2.94583e+07	7.29481e+07	1.44051e+08	2.49955e+08	2.33788e+08	3.00148e+08	1.68731e+08	8.16697e+07	1.97498e+07	4.41503e+07	5.4726e+07	1.15693e+08	3.06914e+08	5.42264e+08	5.35609e+08
	Other		Keratin, type I cytoskeletal 10 OS=Homo sapiens OX=9606 GN=KRT10 PE=1 SV=6	KRT10	P13645	391.567	57	33	651	26	584	58.8	341999		33			5.85202e+07	3.00402e+07	1.98123e+07	2.07341e+07	2.55226e+07	7.48364e+07	1.76959e+08	5.98092e+08	4.32573e+08	1.39575e+07	3.58884e+07	5.92252e+07	2.99191e+07	5.77178e+07	4.5901e+07	1.42129e+08	1.43672e+08	2.39536e+08	1.13352e+08	3.98967e+07	5.37202e+07	3.89151e+07	5.31516e+07	1.51518e+08	1.2139e+08	3.76872e+08	4.03281e+08
	Other		Keratin, type I cytoskeletal 13 OS=Homo sapiens OX=9606 GN=KRT13 PE=1 SV=4	KRT13	P13646	71.588	13	7	106	3	458	49.6	61912		7					737580	3.54534e+06	581644	903031	1.69992e+06	6.32329e+06	1.59937e+06		1.31997e+07	198076	7.21863e+06		9.47433e+06		7.45199e+06	5.46211e+06					941770	98199.7		900513	1.55281e+07
	Other		Keratin, type I cytoskeletal 14 OS=Homo sapiens OX=9606 GN=KRT14 PE=1 SV=4	KRT14	P02533	86.728	29	15	144	6	472	51.5	83912		15			1.07783e+06	2.38932e+06	3.81722e+06	523542	6.03653e+06	1.85598e+06	6.5099e+06	4.14055e+07	1.8285e+07	794809	7.20724e+06	2.48068e+06	1.39899e+07	4.11799e+06	4.50251e+06	7.86376e+06	8.66031e+06	1.82356e+07	7.78308e+06	6.093e+06	6.26552e+06	4.1998e+06	5.88409e+06	4.80944e+06	5.80206e+06	1.49523e+07	1.95929e+07
	Other		Keratin, type I cytoskeletal 16 OS=Homo sapiens OX=9606 GN=KRT16 PE=1 SV=4	KRT16	P08779	54.408	19	10	134	2	473	51.2	78602		10					95126.6	545147		99394.3	642461	2.16756e+06	600624						93212			694318	126875	671363			232732	1.48408e+06
	Other		Keratin, type I cytoskeletal 18 OS=Homo sapiens OX=9606 GN=KRT18 PE=1 SV=2	KRT18	P05783	46.245	21	7	72	5	430	48	43119		7			1.05806e+06	589141	408761	700236	1.76756e+06	155643	326040	140834	118550	1.30702e+06	1.40893e+07	1.10694e+07	1.17157e+06	7.09008e+06	7.61453e+06	5.30269e+07	9.63384e+06	2.37903e+07	8.44665e+06	1.06423e+07	6.06653e+06	9.18351e+06	195616	1.0322e+07	9.76492e+06	998093	9.67265e+06
	Other		Keratin, type I cytoskeletal 19 OS=Homo sapiens OX=9606 GN=KRT19 PE=1 SV=4	KRT19	P08727	49.521	26	11	136	5	400	44.1	77199		11			5.69865e+06	4.42861e+06	1.71657e+06	2.79283e+06	1.23346e+06	7.42819e+06	4.97745e+06	3.58009e+06	789376	1.66466e+06	372690	996499	2.62483e+06	8.26512e+06	1.41412e+06	2.28923e+06	795434	242416	2.20403e+06	1.53572e+06	438906	4.0964e+06	1.10059e+06	5.89677e+06	4.43823e+06	1.14122e+06	6.27126e+06
	Other		Keratin, type II cytoskeletal 2 epidermal OS=Homo sapiens OX=9606 GN=KRT2 PE=1 SV=2	KRT2	P35908	169.05	46	23	387	14	639	65.4	191270		23			3.59847e+07	1.5212e+07	1.37734e+07	6.80403e+06	1.45473e+07	6.90056e+06	3.08634e+07	1.31231e+08	1.30525e+08	2.82727e+07	1.11912e+07	8.14885e+06	6.81753e+06	5.03656e+06	1.34999e+07	2.90192e+07	4.08473e+07	4.35985e+07	2.03248e+07	9.02223e+06	5.60459e+06	1.23214e+07	6.58556e+06	1.41349e+07	2.87049e+07	7.05921e+07	8.43643e+07
	Other		Keratin, type II cytoskeletal 5 OS=Homo sapiens OX=9606 GN=KRT5 PE=1 SV=3	KRT5	P13647	106.824	22	14	54	5	590	62.3	32439		14						1.5503e+06	440185	20061.9	2.00476e+06	1.13603e+07	9.60766e+06		433701	235334	854788		734346	643069	2.64848e+06	1.7713e+06			229627	1.21729e+06	786581	576997	475849	2.52556e+06	1.3731e+06
	Other		Keratin, type II cytoskeletal 6A OS=Homo sapiens OX=9606 GN=KRT6A PE=1 SV=3	KRT6A	P02538	116.845	25	16	64	5	564	60	37846		16			125978	9.73727e+06	1.89319e+06	2.38583e+06	1.30331e+06	8.00794e+06	1.03397e+06	3.04814e+07	1.27412e+07			822200		558081	120325	5.08089e+06	8.87412e+06	2.82506e+06	2.6502e+06	987793	1.33961e+06	1.09383e+06	2.95796e+06	2.33418e+06	6.70072e+06	4.67584e+06	3.10482e+06
	Other		Keratin, type II cytoskeletal 1b OS=Homo sapiens OX=9606 GN=KRT77 PE=1 SV=3	KRT77	Q7Z794	39.412	10	8	214	3	578	61.9	107130		8				2.60583e+07	7.60592e+06			75991.2	2.01193e+06	302740	2.20044e+06	185791	1.53722e+06			227002		902971		413045	6.83685e+06	346421			3.92925e+06	735933		4.38164e+06	8.21842e+06
	Other		Keratin, type II cytoskeletal 8 OS=Homo sapiens OX=9606 GN=KRT8 PE=1 SV=7	KRT8	P05787	110.11	24	15	137	6	483	53.7	83679		15			254566	626905		868034	364189	1.80182e+06	1.76039e+06	2.63283e+06		1.11984e+07	210126	252214	1.08893e+06	6.23642e+06	2.16591e+06	815031	1.32456e+06	5.39489e+06	1.23744e+06	1.96712e+06	1.54529e+06	2.00311e+06	979491	1.14947e+07	1.53932e+06	6.21842e+06	2.37514e+06
	Other		Keratin, type I cytoskeletal 9 OS=Homo sapiens OX=9606 GN=KRT9 PE=1 SV=3	KRT9	P35527	325.148	53	27	276	26	623	62	147061	2.57	27	1		4.12392e+07	2.12106e+07	1.06112e+07	1.489e+07	1.08872e+07	1.26113e+07	4.62569e+07	3.43575e+08	1.67761e+08	6.38677e+06	1.12855e+07	1.36341e+07	9.81983e+06	9.4017e+06	1.80661e+07	8.26571e+07	5.96914e+07	1.03466e+08	2.85749e+07	1.08798e+07	1.43057e+07	2.41641e+07	1.85722e+07	1.81252e+07	4.0065e+07	1.2879e+08	1.50645e+08
	Other		Lysosome-associated membrane glycoprotein 1 OS=Homo sapiens OX=9606 GN=LAMP1 PE=1 SV=3	LAMP1	P11279	11.567	4	2	6	2	417	44.9	3695		2			2.70751e+06	1.24398e+06	1.22485e+06	212893	1.14345e+06	698804	322420			3.0674e+06	602329	1.80858e+06	120831	1.04636e+06		239000	388228		814212	3.37955e+06	331214		716577	1.20185e+06		1.31886e+06	4.2229e+06
	Other		Glutathione S-transferase LANCL1 OS=Homo sapiens OX=9606 GN=LANCL1 PE=1 SV=1	LANCL1	O43813	29.665	13	5	16	5	399	45.3	7264		5			1.11616e+06		129053		95675.8	2.74254e+06	2.44654e+06		1.21941e+06	1.52817e+06	847116	426679	2.23664e+06	200429	1.37317e+06	1.33085e+06	994230		2.61597e+06	298894	447740	1.39726e+06	7.46651e+06	1.55409e+06		753607	451977
	Other		LIM and SH3 domain protein 1 OS=Homo sapiens OX=9606 GN=LASP1 PE=1 SV=2	LASP1	Q14847	15.472	11	4	10	4	261	29.7	5878		4			1.49357e+07	6.5612e+07	3.21921e+07	6.07243e+06	2.66684e+07	256160	1.32002e+06		2.88989e+07	104998	3.73137e+06		1.84841e+06	1.50803e+06	1.08644e+06	1.99545e+06	1.62044e+06	509562	1.33401e+06	2.54711e+06	1.8571e+06	5.43298e+06	2.31551e+06	9.9583e+06	1070.35	1.74784e+06	1.35884e+06
	Other		Delta(14)-sterol reductase LBR OS=Homo sapiens OX=9606 GN=LBR PE=1 SV=2	LBR	Q14739	7.835	2	2	3	2	615	70.7	1373		2					250443	310894				450332	404926			196293		680075	139454		290827					245961	1.17518e+06		535880	344591	703937
	Other		Neutrophil gelatinase-associated lipocalin OS=Homo sapiens OX=9606 GN=LCN2 PE=1 SV=2	LCN2	P80188	39.227	27	4	6	4	198	22.6	3840		4				158036	288860		626388	47833.4				480941		639131								325361				723458	1.34755e+07	378575	972231
	Other		LIM domain-binding protein 3 OS=Homo sapiens OX=9606 GN=LDB3 PE=1 SV=2	LDB3	O75112	11.57	6	3	6	3	727	77.1	2031		3				1.02208e+08	700703		2.19255e+07	4.69659e+06					93870.1				329540			180960	1.53047e+07	4.1586e+07	2.34243e+07	1.65851e+06	1.39834e+07		173964	1.30589e+08	1.35249e+08
	Other		L-lactate dehydrogenase A chain OS=Homo sapiens OX=9606 GN=LDHA PE=1 SV=2	LDHA	P00338	3.415	5	2	5	2	332	36.7	1771		2					155637		221167	4.74683e+06	1.41283e+06	629196	406875		2.22806e+06	582972	311113	2.78581e+06	1.81714e+06	2.10996e+06		323886	1.15536e+06	416740	524997	2.21785e+06	1.48965e+06	430338	8.08329e+06	6.58864e+06	1.09427e+06
	Other		Beta-1,3-N-acetylglucosaminyltransferase lunatic fringe OS=Homo sapiens OX=9606 GN=LFNG PE=1 SV=2	LFNG	Q8NES3	8.261	11	3	3	2	379	41.7	696	5.03	1	2			475917	376632	167863			125139		1.40271e+06		160225								90938.6				47638.1
	Other		Galectin-3-binding protein OS=Homo sapiens OX=9606 GN=LGALS3BP PE=1 SV=1	LGALS3BP	Q08380	58.078	14	7	14	7	585	65.3	7272		7							1.9245e+06	89088.7	758989	582229			1.38579e+06	2.86545e+06	1.94378e+06	3.42774e+06	368293			1.61365e+06	1.7087e+06	1.38221e+06	2.95473e+06	1.74595e+06	1.78502e+06	788149	1.00822e+08	151618	3.05113e+06
	Other		Vesicular integral-membrane protein VIP36 OS=Homo sapiens OX=9606 GN=LMAN2 PE=1 SV=1	LMAN2	Q12907	7.269	6	2	4	2	356	40.2	1621		2				548980				29199.8	1.36971e+06				1.88135e+06	240903	3.11321e+06	524861	459276	1.80636e+06	1.61811e+06	8.12422e+06	7.22863e+07	1.39282e+06	5.25665e+07	5.66883e+06	2.03135e+07	2.23302e+06	1.05815e+06	2.6196e+06	7.93918e+06
	Other		Prelamin-A/C OS=Homo sapiens OX=9606 GN=LMNA PE=1 SV=1	LMNA	P02545	43.976	18	11	31	11	664	74.1	13126		11			7.2565e+06	6.00195e+06	984569	379902	1.49363e+06	2.3556e+06	3.53575e+06	1.095e+06	2.74898e+06	519601	3.78802e+06	2.91851e+06	1.17684e+06	1.76525e+07	6.33956e+06	1.50078e+06	1.08919e+07	1.54506e+06	3.0024e+06	5.68074e+06	3.97093e+06	5.38845e+06	5.70336e+06	4.05131e+06	3.34002e+06	4.34135e+06	1.39598e+06
	Other		Leiomodin-1 OS=Homo sapiens OX=9606 GN=LMOD1 PE=1 SV=3	LMOD1	P29536	30.775	10	5	6	5	600	67	2711		5				652921	929883		340388	7.98572e+06	450245				1.93249e+06	622385	3.21449e+06	2.24984e+06	1.03723e+07	2.72678e+06	3.23677e+06	1.12422e+06				341117	286449
	Other		Lysophospholipid acyltransferase 5 OS=Homo sapiens OX=9606 GN=LPCAT3 PE=1 SV=1	LPCAT3	Q6P1A2	43.935	20	7	39	7	487	56	11258	31.5	6	1	Met-loss+Acetyl [N-Term]	354012	351378	138414	1.12524e+06	3.41618e+06		5.51249e+06	1.45054e+06	545778	1.02336e+06	125365	2.85136e+06	7.82271e+06	1.15458e+07	361738	623361	1.20536e+07	1.38185e+07	3.66974e+06	8.98743e+06	6.35096e+06	7.2987e+06	2.70932e+06	2.43191e+06	1.52065e+06	2.58528e+06	7.22902e+06
	Other		Lipoma-preferred partner OS=Homo sapiens OX=9606 GN=LPP PE=1 SV=1	LPP	Q93052	86.615	26	13	80	13	612	65.7	34180		13			2.87176e+06	4.41778e+06	6.853e+06	1.65146e+06	3.73114e+06	2.44908e+07	1.93134e+07	7.26696e+06	4.69982e+06	9.28842e+06	1.51765e+07	4.88915e+06	4.2499e+06	1.01175e+07	1.71479e+07	7.92724e+06	3.58538e+06	3.08349e+06	2.63083e+06	7.98445e+06	2.23338e+06	783865	5.81804e+06	2.10971e+06	4.27143e+06	3.67023e+06	1.99596e+06
	Other		Leucine-rich PPR motif-containing protein, mitochondrial OS=Homo sapiens OX=9606 GN=LRPPRC PE=1 SV=3	LRPPRC	P42704	34.236	6	7	14	7	1394	157.8	5563		7			3.5408e+06	123979	433103	298964	260952	2.55381e+06	2.45766e+06	110373	156793	1.65479e+06	165710	7.47355e+07	1.03061e+07	1.01514e+08	401061	5.15567e+07	4.78688e+06	1.23424e+08	1.25194e+06	6.59036e+07	975091		1.23041e+06	4.91272e+06	2.78193e+06	2.44178e+06	2.44111e+06
	Other		Leucine-rich repeat-containing protein 59 OS=Homo sapiens OX=9606 GN=LRRC59 PE=1 SV=1	LRRC59	Q96AG4	3.649	8	2	2	2	307	34.9	695		2							533786							2.29874e+06		1.43836e+06								773105			271565
	Other		Lactotransferrin OS=Homo sapiens OX=9606 GN=LTF PE=1 SV=6	LTF	P02788	420.744	61	42	405	41	710	78.1	213106		42			1.09197e+08	5.67433e+07	4.71191e+07	2.96148e+07	4.22358e+07	2.64917e+07	1.77097e+07	3.27449e+07	1.02231e+08	7.57728e+07	4.70162e+07	4.23054e+07	1.50687e+07	2.80266e+07	1.12563e+07	4.41788e+07	2.26312e+07	5.42403e+07	5.02007e+07	1.54001e+07	9.27287e+06	2.368e+07	1.47555e+07	3.73962e+07	4.15934e+08	1.52888e+08	4.40014e+07
	Other		Lysozyme C OS=Homo sapiens OX=9606 GN=LYZ PE=1 SV=1	LYZ	P61626	122.368	62	12	97	12	148	16.5	47939		12			3.8269e+07	1.4466e+07	5.70069e+06	2.8141e+07	9.3805e+06	1.74452e+06	1.56848e+07	1.76646e+07	7.72823e+06	3.69828e+07	7.2526e+06	4.40999e+06	3.46368e+07	3.9411e+07	3.65728e+06	1.91199e+07	4.34454e+07	9.17776e+06	1.14426e+07	8.86078e+06	9.42009e+06	3.71229e+06	6.05574e+06	9.60182e+06	6.8604e+06	1.58199e+07	1.51481e+07
	Other		Protein MAL2 OS=Homo sapiens OX=9606 GN=MAL2 PE=1 SV=1	MAL2	Q969L2	8.811	19	2	12	2	176	19.1	4105	7.2	1	1	Met-loss+Acetyl [N-Term]		362439	283377	472848	689408	146912	1.47394e+06	103702	510813	263709	155884	854917	751784	3.24008e+06		636458	986447		986699	5.15451e+06	1.97533e+06	363215	86738.3	75536.9		435723	3.15158e+06
	Other		Amine oxidase [flavin-containing] A OS=Homo sapiens OX=9606 GN=MAOA PE=1 SV=1	MAOA	P21397	40.272	13	7	54	5	527	59.6	23814		7			276059	2.3835e+06	2.15619e+06	1.43403e+06	1.21768e+06	6150442	7.67978e+06	385261	1.93257e+06	1.31228e+07	1.38923e+06	1.98604e+06	663850	2.18492e+06	1.01928e+07	3.26778e+06	286147	1.76391e+07	3.00007e+06	797009	395901	1.36158e+06	1.03199e+06	141681	3.76876e+06	2.68474e+06	4.36523e+06
	Other		Amine oxidase [flavin-containing] B OS=Homo sapiens OX=9606 GN=MAOB PE=1 SV=3	MAOB	P27338	45.913	13	9	57	7	520	58.7	24072		9			1.92676e+06	1.54193e+06	6.63155e+06	2.40092e+06	1.84605e+07	1.01497e+06	6.86685e+06	4.53954e+06	1.30838e+07	1.56258e+07	2.91893e+06	3.13952e+06	5.56487e+06	7.81314e+06	2.31304e+06	4.69848e+06	9.25988e+06	1.9854e+06	1.67894e+07	6.37593e+06	2.34968e+06	8.78364e+06	4.81817e+06	6.98863e+06	1.93678e+06	2.08083e+07	2.32092e+07
	Other		Microtubule-associated protein 4 OS=Homo sapiens OX=9606 GN=MAP4 PE=1 SV=3	MAP4	P27816	6.029	2	2	2	2	1152	120.9	793		2								159346								19046.7	289287				10443.7		27215.2		14860.4
	Other		Microtubule-associated protein RP/EB family member 1 OS=Homo sapiens OX=9606 GN=MAPRE1 PE=1 SV=3	MAPRE1	Q15691	16.943	17	4	7	4	268	30	2369		4			2.34092e+06	1.87996e+06	348130	1.15317e+06	2.03002e+06	4.22176e+06	1.17988e+06	77387.6	320740			615505	216355	206186	2.36844e+06		1.24166e+06	592455	293690	171285			2.2104e+06	1.60532e+06	275238	558875	1.03168e+06
	Other		Lysophospholipid acyltransferase 7 OS=Homo sapiens OX=9606 GN=MBOAT7 PE=1 SV=2	MBOAT7	Q96N66	27.69	11	4	16	4	472	52.7	7078		4				1.13993e+06	1.45063e+06	960178	800436	59045.4	2.00533e+06	3.47309e+06	946493	416390	1.01432e+06	1.90681e+06	5.81679e+06	4.27604e+06	928846	4.22304e+06	3.75356e+06	370836	4.49743e+06	2.38312e+06	346059	3.7338e+06	1.19638e+06	6.01085e+06	2.81675e+06	2.78254e+06	1.64386e+06
	Other		Cell surface glycoprotein MUC18 OS=Homo sapiens OX=9606 GN=MCAM PE=1 SV=2	MCAM	P43121	45.654	13	7	25	7	646	71.6	10831		7			576760			860225	1.08478e+06	4.80779e+06	4.13056e+06	242834	823234	2.61951e+06		2.47413e+06	968169	2.90146e+06	7.09749e+06	2.72684e+06	4.0874e+06	753254	2.64024e+06	1.38645e+06	666238	72725.3	1.1945e+06	3.2976e+06	5.19555e+06	177610	708631
	Other		Malate dehydrogenase, mitochondrial OS=Homo sapiens OX=9606 GN=MDH2 PE=1 SV=3	MDH2	P40926	15.389	10	3	6	3	338	35.5	2478		3			1.41196e+06	3.87179e+06	1.85542e+06	438694	368750	74055.9	8.25117e+06	179656	161941	1.2462e+06	685441	384555	112678	1.59134e+06		309966	190730				198883	628126		368687		302338
	Other		Methyltransferase-like protein 7A OS=Homo sapiens OX=9606 GN=METTL7A PE=1 SV=1	METTL7A	Q9H8H3	22.51	14	3	28	3	244	28.3	12624		3			926851	4.28558e+06	3.87127e+06	5.96339e+06	1.70677e+07		1.74984e+06	3.63251e+06	2.81598e+06	3.7054e+06	2.80336e+06	3.96594e+06	5.38387e+06	3.90021e+06	1.13786e+06	4.10513e+06	1.01643e+07	4.84191e+06	3.9676e+06	5.51593e+06	5.0661e+06	432360	6.09798e+06	5.14129e+06	239622	1.44932e+06	2.49188e+06
	Other		Major facilitator superfamily domain-containing protein 10 OS=Homo sapiens OX=9606 GN=MFSD10 PE=1 SV=1	MFSD10	Q14728	13.708	7	2	7	2	455	48.3	3719		2				538856	846259	130459		27955.4	2.14867e+06		99583.9		39722.3		126974		652800	835982	93107.9	119115		1.89821e+06		329346	156222	1.1563e+06	174430	80985.6	2.04488e+06
	Other		Alpha-1,3-mannosyl-glycoprotein 2-beta-N-acetylglucosaminyltransferase OS=Homo sapiens OX=9606 GN=MGAT1 PE=1 SV=2	MGAT1	P26572	4.745	4	2	2	2	445	50.8	732		2				312546			145496	1.82008e+06							279410		343300	1.00027e+06							185107
	Other		Microsomal glutathione S-transferase 1 OS=Homo sapiens OX=9606 GN=MGST1 PE=1 SV=1	MGST1	P10620	20.092	25	4	11	4	155	17.6	4192		4				629930	844526	1.13075e+06	1.12509e+06	115118	977291		336933	5.55542e+06	1.216e+06	1.73033e+06	627478	801982	282038	1.87871e+06	1.20569e+06	777192	583229	680932	875556	2.41748e+06	898151	4.41646e+06	116390	529848	450368
	Other		Microsomal glutathione S-transferase 2 OS=Homo sapiens OX=9606 GN=MGST2 PE=1 SV=1	MGST2	Q99735	11.457	10	2	28	2	147	16.6	12607		2			2.04834e+06	2.09759e+06	1.22181e+06	698693	731622	43188.9	4.33773e+06	645085	2.01908e+06	306859	1.69934e+06	2.16918e+06	2.86402e+06	4.50392e+06	1.38738e+06	2.87065e+06	4.21567e+06	1.30063e+06	979793	4.00117e+06	2.49452e+06	2.14734e+06	1.62547e+06	3.16501e+06	765483		2.55204e+06
	Other		Microsomal glutathione S-transferase 3 OS=Homo sapiens OX=9606 GN=MGST3 PE=1 SV=1	MGST3	O14880	46.577	53	7	45	7	152	16.5	22078		7			182965	3.4204e+06	3.32204e+06	2.76027e+06	1.68308e+06	1.25275e+06	2.65178e+06	936333	1.67659e+07	657599	1.96912e+06	5.34864e+06	3.16276e+06	1.72675e+06	1.38946e+06	7.24353e+06	9.23924e+06	593836	1.87417e+06	3.1716e+07	8.97578e+06	1.58874e+06	3.0421e+06	2.23114e+06	1.79907e+06	1.11513e+07	4.14002e+07
	Other		Macrophage migration inhibitory factor OS=Homo sapiens OX=9606 GN=MIF PE=1 SV=4	MIF	P14174	5.9	32	2	4	2	115	12.5	1316		2						270280		778211							74376.5	632841	290761	570429		579283	28965.4	688999	306212	2.34415e+06	63348.7	1.12391e+07			352189
	Other		Malectin OS=Homo sapiens OX=9606 GN=MLEC PE=1 SV=1	MLEC	Q14165	6.846	7	2	2	2	292	32.2	871		2					440722	315308	1.39941e+06								170492
	Other		Mannosyl-oligosaccharide glucosidase OS=Homo sapiens OX=9606 GN=MOGS PE=1 SV=5	MOGS	Q13724	5.765	3	2	5	2	837	91.9	1403		2						83811.9			4.3985e+07		70195.1		932267		4.5653e+06		1.23154e+06	2.31728e+06	5.27738e+06	641744	168959	1.95857e+06		595764	1.80762e+06	4.80171e+06	102810	4.05735e+06	2.13848e+06
	Other		Myeloperoxidase OS=Homo sapiens OX=9606 GN=MPO PE=1 SV=1	MPO	P05164	525.046	52	52	1059	45	745	83.8	565869		52			1.06194e+08	3.54648e+07	4.46098e+07	4.00177e+07	1.44253e+08	1.143e+07	6.90537e+07	1.58632e+08	7.15115e+07	5.57029e+07	7.76724e+07	1.06868e+08	6.15874e+07	7.62797e+07	2.34525e+07	1.93006e+08	7.13174e+07	1.22794e+08	4.83693e+08	8.11066e+07	5.35319e+07	1.62075e+08	6.16678e+07	2.48504e+08	1.67083e+09	5.21232e+08	1.40863e+08
	Other		Mitochondrial carrier homolog 2 OS=Homo sapiens OX=9606 GN=MTCH2 PE=1 SV=1	MTCH2	Q9Y6C9	113.137	42	11	184	11	303	33.3	45784	368.75	10	1	Met-loss+Acetyl [N-Term]	1.90261e+06	4.65536e+06	5.11799e+06	9.20648e+06	7.88764e+06	9.64947e+06	3.07885e+07	6.21574e+06	8.71421e+06	4.22979e+06	7.73435e+06	1.23331e+07	8.33428e+06	9.44766e+06	8.12541e+06	5.20541e+07	5.18065e+06	7.22712e+06	1.53224e+07	1.89078e+07	4.58059e+06	1.78921e+07	8.83554e+06	2.9951e+07	1.06614e+07	1.16073e+07	2.01978e+07
	Other		C-1-tetrahydrofolate synthase, cytoplasmic OS=Homo sapiens OX=9606 GN=MTHFD1 PE=1 SV=3	MTHFD1	P11586	11.455	5	4	4	4	935	101.5	1296		4			552742	4.65752e+06	4.0845e+06	102487	1.70716e+07	539470	878610	417306		47817.2	2.21476e+06		132690	2.24633e+07	289925	682505	486627	449416	268894		1.84038e+07		2.28141e+06	1.08749e+06		658791	375501
	Other		Interferon-induced GTP-binding protein Mx1 OS=Homo sapiens OX=9606 GN=MX1 PE=1 SV=4	MX1	P20591	14.443	6	4	9	4	662	75.5	2913		4				887489		177849	166143			308798			342520	277209	309113	242910			1.55829e+06	514776	793536	1.19907e+06	146506	2.83095e+06	781853	6.53719e+06			126105
	Other		Myeloid-associated differentiation marker OS=Homo sapiens OX=9606 GN=MYADM PE=1 SV=2	MYADM	Q96S97	57.58	16	5	120	5	322	35.3	64745		5			9.41327e+06	3.39466e+06	1.22355e+06	2.37352e+06	3.97532e+06	1.16795e+07	9.5496e+06	3.56835e+06	1.10361e+07	1.5619e+07	1.78224e+06	8.21202e+06	8.2708e+06	6.16353e+06	2.25478e+07	1.30087e+07	4.62416e+06	4.33959e+06	1.44359e+07	7.31182e+06	4.06859e+06	4.64899e+06	1.19187e+07	9.96212e+06	2.48837e+06	3.60981e+06	2.60732e+07
	Other		Myosin-11 OS=Homo sapiens OX=9606 GN=MYH11 PE=1 SV=3	MYH11	P35749	1714.09	58	141	2096	111	1972	227.2	1067533	25.68	141	4		1.23305e+08	1.34538e+08	1.55881e+08	1.09281e+08	1.59361e+08	2.6358e+09	4.23736e+08	1.00499e+08	2.25657e+08	4.65336e+08	2.33477e+08	7.4745e+07	1.60308e+08	2.39866e+08	2.93149e+09	1.54719e+08	2.63594e+08	1.79009e+08	1.17656e+08	1.51878e+08	9.48037e+07	7.40932e+07	4.67251e+08	1.28412e+08	1.20162e+08	1.28453e+08	1.11571e+08
	Other		Myosin-9 OS=Homo sapiens OX=9606 GN=MYH9 PE=1 SV=4	MYH9	P35579	521.796	29	62	569	34	1960	226.4	283940	0	62	1		2.76772e+07	1.02435e+07	1.57156e+07	7.55905e+06	8.0372e+06	2.73866e+07	2.57341e+07	1.61266e+07	1.58016e+08	8.23898e+07	5.25759e+07	1.26691e+07	3.06445e+07	1.48325e+07	1.3272e+07	3.05976e+07	1.51687e+07	1.62532e+07	7.36295e+06	1.35212e+07	1.13196e+07	1.28708e+07	1.35557e+07	4.60148e+07	1.61547e+07	1.32804e+07	1.66983e+07
	Other		Myosin regulatory light chain 12B OS=Homo sapiens OX=9606 GN=MYL12B PE=1 SV=2	MYL12B; MYL12A	O14950	11.707	13	2	6	2	172	19.8	2690		2						673055	829392	190099	1.16476e+06	1.97657e+06	1.87363e+06	1.1978e+06	1.36998e+06		971744	736815	644999	967826	7.26062e+06	4.67653e+06	973255	343551		4.66382e+06	605708	2.12567e+06	354840	5.74854e+06	428560
	Other		Myosin light polypeptide 6 OS=Homo sapiens OX=9606 GN=MYL6 PE=1 SV=2	MYL6	P60660	4.596	17	2	5	2	151	16.9	206	8.07	1	1	Met-loss+Acetyl [N-Term]				849611	1.09289e+06	369422	1.03148e+06	400954		260254		209661	415381	752587	931825	496212	1.02503e+06		414043	819311	431734	1.51512e+06	2.58105e+06	1.03081e+06	370126	695096	2.19073e+06
	Other		Myosin light chain kinase, smooth muscle OS=Homo sapiens OX=9606 GN=MYLK PE=1 SV=4	MYLK	Q15746	70.164	9	14	73	14	1914	210.6	29526		14			2.21034e+06	4.28417e+06	2.61279e+06	3.94081e+07	3.39918e+07	1.29231e+07	5.87158e+06	1.46913e+06	5.16977e+06	5.2596e+06	1.73927e+07	4.12149e+06	2.50524e+06	8.50371e+06	1.85592e+07	6.74725e+06	2.52965e+07	3.00726e+06	3.55534e+06	3.96819e+06	3.12673e+07	2.42791e+06	9.67205e+06	1.43579e+07	1.13183e+06	5.90305e+06	5.9094e+06
	Other		Unconventional myosin-Ic OS=Homo sapiens OX=9606 GN=MYO1C PE=1 SV=4	MYO1C	O00159	124.928	20	21	98	20	1063	121.6	45306		21			5.99559e+06	6.94921e+06	4.29486e+06	8.9605e+06	2.97254e+06	5.10829e+07	2.53452e+07	8.36261e+06	7.65599e+06	1.245e+07	1.15545e+07	4.41457e+06	6.11656e+06	1.52533e+07	2.14985e+07	3.08426e+06	9.26191e+06	6.36077e+06	3.60104e+06	7.07288e+06	6.39729e+06	3.53416e+06	2.68152e+07	1.17182e+07	967524	5.31551e+06	5.81365e+06
	Other		Unconventional myosin-Id OS=Homo sapiens OX=9606 GN=MYO1D PE=1 SV=2	MYO1D	O94832	21.301	4	4	7	3	1006	116.1	3380		4			1.14342e+07	5.94239e+06	1.87867e+07	3.65355e+08	9.62508e+06	710321	1.36592e+06	4.57004e+06	1.30697e+06	150844	409555			1.82971e+06	2.78493e+06	382003	384542	911932	1.18474e+06	239053	81495.3	1.26941e+06	2.79548e+06	1.64235e+06	416306	1.38248e+06	452854
	Other		Nicotinamide phosphoribosyltransferase OS=Homo sapiens OX=9606 GN=NAMPT PE=1 SV=1	NAMPT	P43490	6.313	5	2	2	2	491	55.5	1078		2												52382.4									83297.3					692498
	Other		Neural cell adhesion molecule 1 OS=Homo sapiens OX=9606 GN=NCAM1 PE=1 SV=3	NCAM1	P13591	22.621	6	4	5	4	858	94.5	2587		4						415428	407077	502646		274405	802736					469889	1.32064e+06	1.23391e+06	1.16901e+06	1.07043e+06	320576					177660	687967		1.45416e+06
	Other		Neutrophil cytosol factor 2 OS=Homo sapiens OX=9606 GN=NCF2 PE=1 SV=2	NCF2	P19878	2.931	5	2	2	2	526	59.7	204	1.93	1	1	Met-loss+Acetyl [N-Term]			195275		2.88389e+06	862496						428099		1.91614e+06					1.63106e+06	1.87787e+06	1.31864e+06			110014		219978
	Other		Nucleolin OS=Homo sapiens OX=9606 GN=NCL PE=1 SV=3	NCL	P19338	12.883	4	3	6	3	710	76.6	1886		3			583352					354271	680051				332388	245030	482537	516984	255082	357127	124253	411700	986201	198932	163864			2.01045e+06		418384	751553
	Other		NADH-ubiquinone oxidoreductase chain 4 OS=Homo sapiens OX=9606 GN=MT-ND4 PE=1 SV=1	ND4	P03905	47.315	12	4	17	4	459	51.5	9770	5.4	4	1			192377		78944.1			208226	1.26219e+06	268524		172998	1.63182e+06		780124		163047		84580.5	564878		774409	125492	129760	144215	22148		32437.1
	Other		NADH dehydrogenase [ubiquinone] 1 alpha subcomplex subunit 11 OS=Homo sapiens OX=9606 GN=NDUFA11 PE=1 SV=3	NDUFA11	Q86Y39	60.22	40	5	68	5	141	14.8	32043		5			1.68247e+06	4.58012e+06	3.72618e+06	4.99262e+06	5.05336e+06	1.82265e+07	3.56267e+07	3.78976e+06	1.19995e+07	8.52014e+06	3.7825e+06	7.05986e+06	3.9109e+06	1.70765e+07	2.04541e+07	1.5413e+07	325367	8.20233e+06	1.23726e+07	9.50609e+06	7.57482e+06	4.53594e+06	1.56183e+06	2.13236e+07	3.16968e+06	8.23169e+06	1.53203e+07
	Other		Cytochrome c oxidase subunit NDUFA4 OS=Homo sapiens OX=9606 GN=NDUFA4 PE=1 SV=1	NDUFA4	O00483	22.151	37	4	5	4	81	9.4	2839		4				617318	1.71458e+06	1.78436e+06	1.15422e+06		674809	203587	739303	523000		294503	497263	556596	2.07093e+06	1.87866e+06	1.05292e+06	523808	264885	1.17697e+06	116661	300385	409985	4.77944e+06	199253
	Other		NADH dehydrogenase [ubiquinone] 1 beta subcomplex subunit 4 OS=Homo sapiens OX=9606 GN=NDUFB4 PE=1 SV=3	NDUFB4	O95168	11.762	18	2	13	2	129	15.2	6505		2				197584	676315	695558	234592	3.13253e+06	1.89407e+06			305374	327685	1.40044e+06	554379	2.01022e+06	1.91184e+06	840744	540961	692032	485662	1.23616e+06	1.63424e+06		1.29357e+06	769282			691045
	Other		Nucleoside diphosphate kinase 3 OS=Homo sapiens OX=9606 GN=NME3 PE=1 SV=2	NME3	Q13232	11.253	15	2	3	2	169	19	1218		2												1.4986e+06
	Other		NAD(P) transhydrogenase, mitochondrial OS=Homo sapiens OX=9606 GN=NNT PE=1 SV=3	NNT	Q13423	47.078	8	7	16	7	1086	113.8	7462		7			774699	4.8547e+06	1.23406e+06	3.96201e+06	2.3261e+06	4.72394e+06	2.5324e+06	222188	6.37009e+06	3.55882e+06	1.09825e+06		2.22589e+06	1.61124e+06	2.86894e+06	3.17474e+06	1.82401e+06	2.75889e+06	1.04431e+06	942363		150967	1.64852e+06	2.13753e+06	3.18218e+06	227853	3.02995e+06
	Other		Nucleolar complex protein 2 homolog OS=Homo sapiens OX=9606 GN=NOC2L PE=1 SV=4	NOC2L	Q9Y3T9	3.652	5	2	2	2	749	84.9	634		2							89501.7	29078.2					28859.7							87677.7		407061				818103	79792.2	54655.6
	Other		Nucleophosmin OS=Homo sapiens OX=9606 GN=NPM1 PE=1 SV=2	NPM1	P06748	14.684	17	4	13	4	294	32.6	3387		4			1.23461e+06	2.36389e+06	1.75574e+06	1.83347e+06	3.57333e+06	569613	1.65016e+06	2.80718e+06	3.02043e+06	236638	4.87602e+06		1.76092e+06	483548	226407	900833		4.60264e+06	1.73372e+06	2.18331e+06		3.24818e+06	6.05481e+06	4.70413e+06	997013	5.99679e+06	3.10598e+06
	Other		Nucleoplasmin-3 OS=Homo sapiens OX=9606 GN=NPM3 PE=1 SV=3	NPM3	O75607	8.812	17	2	2	2	178	19.3	993		2				556369		170922	304106	1.81265e+06		434057	251535		222291		385815		2.86978e+06			488694		198340		2.73145e+06		2.49773e+06	430692	260122	691516
	Other		Neuroplastin OS=Homo sapiens OX=9606 GN=NPTN PE=1 SV=2	NPTN	Q9Y639	12.892	9	4	17	4	398	44.4	8309		4			4.35089e+06	1.35893e+06	745049	1.30243e+06	427935	27596.4	1.21701e+06	3.42097e+06	3.07028e+06		336197	1.48852e+06	1.15196e+06	1.97287e+06	245435	979348	1.47964e+06	2.07965e+06	4.23894e+06		2.76604e+06	6.69528e+06	953013	5.61597e+06	1.21292e+06	7.73536e+06	9.51576e+06
	Other		Nuclear mitotic apparatus protein 1 OS=Homo sapiens OX=9606 GN=NUMA1 PE=1 SV=2	NUMA1	Q14980	4.409	1	2	9	2	2115	238.1	2329		2				155046	246740	464516	429331	3.12665e+06	462777			46676.7	964550	714112	818198	762812	3.36994e+06	374010	1.8244e+06	1.41235e+06	1.06759e+06	1.10276e+06	234011	81681.3	1.17955e+06	318295	318329	4.5754e+06	2.1766e+06
	Other		Nucleoporin NUP188 homolog OS=Homo sapiens OX=9606 GN=NUP188 PE=1 SV=1	NUP188	Q5SRE5	13.821	1	2	2	2	1749	195.9	1168		2									290843	43847.2						107926	186556		60101.3			390578		556859	347523	1.63631e+06			498203
	Other		Nuclear pore complex protein Nup205 OS=Homo sapiens OX=9606 GN=NUP205 PE=1 SV=3	NUP205	Q92621	8.826	2	2	2	2	2012	227.8	1130		2																									92453.2	280825
	Other		2'-5'-oligoadenylate synthase 1 OS=Homo sapiens OX=9606 GN=OAS1 PE=1 SV=4	OAS1	P00973	9.433	5	2	2	2	400	46	1002		2				269964						423243		24533.1	303406			167592						372120				2.62465e+06		707538	908853
	Other		2'-5'-oligoadenylate synthase 2 OS=Homo sapiens OX=9606 GN=OAS2 PE=1 SV=3	OAS2	P29728	17.372	5	4	8	4	719	82.4	3510		4						195208	440871	507858		70574	102982	173813	178564	723727	339013	1.08385e+06	103700		626893	585180	1.54126e+06	2.50908e+06	1.2103e+06	985226	493389	9.88024e+06		333963	1.41052e+06
	Other		2'-5'-oligoadenylate synthase 3 OS=Homo sapiens OX=9606 GN=OAS3 PE=1 SV=3	OAS3	Q9Y6K5	14.796	3	3	4	3	1087	121.1	1956		3			243084				442784	149207				84649.7	162266			144020			267122		1.52999e+06	599723	1.03777e+06		74716.4	3.6311e+06	330918
	Other		OCIA domain-containing protein 1 OS=Homo sapiens OX=9606 GN=OCIAD1 PE=1 SV=1	OCIAD1	Q9NX40	15.307	12	2	2	2	245	27.6	1021		2						318298		20458.3	246366		56195.4				799848		242833	403771		1.02251e+06	480131	76101.3			1.04448e+06	1.42737e+06	611359	451151	814354
	Other		OCIA domain-containing protein 2 OS=Homo sapiens OX=9606 GN=OCIAD2 PE=1 SV=1	OCIAD2	Q56VL3	27.407	26	4	7	4	154	16.9	4734		4			680857					57572.5	1.34488e+06					1.40021e+06	682878	473903		2.24892e+06		7.43794e+07	1.33771e+06	4.38323e+06	409160	809299	64674.5	279833	1.6947e+06	1.46394e+06	4.25555e+06
	Other		2-oxoglutarate dehydrogenase, mitochondrial OS=Homo sapiens OX=9606 GN=OGDH PE=1 SV=3	OGDH	Q02218	19.354	5	5	9	5	1023	115.9	4385		5			298172				103428	984067	2.39739e+06	6.42125e+06	30291.7	248379	399275	275215	2.16853e+06	601654	1.27525e+06	292946	1.85037e+06	625601	2.78496e+06	3.71491e+06	2.67384e+06	3.53946e+06	6.72585e+06	1.26868e+06	188657	1.70777e+06	905723
	Other		Olfactomedin-4 OS=Homo sapiens OX=9606 GN=OLFM4 PE=1 SV=1	OLFM4	Q6UX06	29.795	15	7	10	7	510	57.2	2867	7.9	5	2			1.93329e+06	1.29673e+06			10999.7	775890		1.36594e+07	4.34101e+06	2.91086e+06	6.52416e+06	875009	897691	1.36122e+06	3.16259e+06	3.49357e+06	450470	2.25581e+07	6.21232e+06	352698	6.92302e+07	691629	3.95283e+06	6.81084e+07	4.97092e+07	1.84623e+07
	Other		Olfactomedin-like protein 1 OS=Homo sapiens OX=9606 GN=OLFML1 PE=1 SV=2	OLFML1	Q6UWY5	28.031	12	5	19	5	402	45.9	8243		5			8.40985e+06	6.8664e+06	3.17158e+06	8.8383e+06	4.45283e+06	1.28288e+07	1.65088e+06	2.69632e+06	1.31234e+07	422959	2.27809e+06	2.6842e+06	8.38373e+06	9.83075e+06	5.94753e+06	2.7606e+06	2.68222e+06	648265	5.60757e+06	5.71068e+06	274825	332635	407327	852359	218391	823664	5.20069e+06
	Other		Olfactomedin-like protein 3 OS=Homo sapiens OX=9606 GN=OLFML3 PE=2 SV=1	OLFML3	Q9NRN5	9.7	6	2	4	2	406	46	1640		2					782456		483226		251005			367235	516326	359406	483234	485991	427332		550547	302963	271811	453580	556154	532272	1.48285e+06	1.53027e+06	2.19083e+06	5.59269e+06	1.7918e+06
	Other		Oligosaccharyltransferase complex subunit OSTC OS=Homo sapiens OX=9606 GN=OSTC PE=1 SV=1	OSTC	Q9NRP0	24.655	8	3	124	3	149	16.8	50295		3			2.91922e+07	1.00547e+07	7.15572e+06	3.9521e+06	8.32753e+06	1.84608e+06	5.62187e+06	2.22605e+06	1.84636e+07	6.28744e+06	9.01854e+06	9.48323e+06	6.10018e+06	8.23379e+06	1.56139e+06	4.86955e+06	7.76122e+06	9.39383e+06	1.77052e+07	1.19133e+07	8.43195e+06	1.01297e+07	5.06928e+06	8.36432e+06	6.92389e+06	1.37584e+07	1.73116e+07
	Other		Polyadenylate-binding protein 1 OS=Homo sapiens OX=9606 GN=PABPC1 PE=1 SV=2	PABPC1	P11940	26.192	8	5	7	3	636	70.6	3184		5				435214			800523	980071	924787							3.02756e+06	978035		222749	999612	1.76168e+06	1.38283e+06	583377		2.05203e+06	9.53201e+06		376409	503643
	Other		Palladin OS=Homo sapiens OX=9606 GN=PALLD PE=1 SV=3	PALLD	Q8WX93	108.541	15	19	134	19	1383	150.5	60456		19			4.39018e+07	4.82882e+07	7.39647e+07	7.92878e+07	4.63768e+07	6.17546e+07	9.01095e+07	4.50147e+06	1.70314e+07	1.51237e+07	1.92363e+07	2.95127e+07	4.07778e+07	2.01666e+07	8.06919e+07	2.20955e+07	2.33242e+07	1.67809e+07	3.14417e+07	2.86592e+07	5.64529e+07	4.81802e+07	1.39596e+07	2.47044e+07	3.21761e+07	4.97739e+06	7.82056e+06
	Other		Protein mono-ADP-ribosyltransferase PARP14 OS=Homo sapiens OX=9606 GN=PARP14 PE=1 SV=3	PARP14	Q460N5	9.191	2	3	15	3	1801	202.7	4029		3			5.0735e+06		424877	2.5125e+06	2.57044e+06	1.15299e+06	6.87747e+06	1.0203e+06	1.14529e+06	1.80135e+06	2.20792e+06	531304	189801	2.59763e+06	3.04679e+06			835976	2.34526e+06	352736	226576	1.50471e+06	7.2858e+06	6.96107e+06	1.62789e+07	956762	943661
	Other		Alpha-parvin OS=Homo sapiens OX=9606 GN=PARVA PE=1 SV=1	PARVA	Q9NVD7	21.988	12	3	9	3	372	42.2	3487		3			3.51409e+06		2.6177e+06	259395	764466	1.63614e+07	2.05671e+06	513239			2.20784e+06	1.16823e+06	733274	512613	2.78566e+06	2.37415e+06	2.52095e+06	257552	862465	705474	614349	190966	371415	2.16137e+06	170156	339278	823730
	Other		Poly(rC)-binding protein 1 OS=Homo sapiens OX=9606 GN=PCBP1 PE=1 SV=2	PCBP1	Q15365	87.614	34	11	81	8	356	37.5	34503		11			892587	7.73129e+06	4.66598e+06	7.13856e+06	7.37695e+06	1.35743e+07	1.62718e+07	4.952e+06	1.73602e+07	1.17709e+07	1.73079e+07	1.00641e+06	1.59017e+07	2.16727e+07	2.0262e+07	1.86857e+07	1.54357e+07	2.90393e+07	1.60759e+07	1.24127e+07	3.09308e+06	1.8314e+06	1.22195e+07	5.81562e+07	9.96149e+06	9.62547e+06	1.48362e+07
	Other		Poly(rC)-binding protein 2 OS=Homo sapiens OX=9606 GN=PCBP2 PE=1 SV=1	PCBP2	Q15366	66.054	25	8	82	5	365	38.6	35539		8			711321	350023	2.34569e+06	3.36879e+06	2.17204e+06	4.79099e+06	2.28891e+06	3.61633e+06	3.74412e+06	7.50115e+06	3.42844e+06	1.34861e+06	4.72263e+06	8.2784e+06	1.94776e+06	2.3423e+06	2.09946e+06	2.84074e+06	4.62762e+06	4.64167e+06	1.61717e+06	3.14676e+06	6.95937e+06	2.81654e+07	6.37425e+06	2.70496e+06	7.09338e+06
	Other		Programmed cell death 6-interacting protein OS=Homo sapiens OX=9606 GN=PDCD6IP PE=1 SV=1	PDCD6IP	Q8WUM4	31.077	7	6	9	5	868	96	3681		6			4.70242e+06	271788	302038			8.28841e+06	6.98252e+06	1.58006e+06	124354		830125	91194.8	158170	467372	1.25087e+06			96509.4		183992		345576		1.19747e+06		2.07789e+06
	Other		PDZ and LIM domain protein 3 OS=Homo sapiens OX=9606 GN=PDLIM3 PE=1 SV=1	PDLIM3	Q53GG5	47.4	20	4	27	4	364	39.2	11897		4				2.98453e+07	2.40865e+07	4.19593e+07	277304	3.89217e+07	6.20145e+07	969446	215008	651431	2.27726e+07		4.38822e+07	4.06523e+06	4.83391e+07	7.00726e+07	388219	2.45841e+06	483949	2.61357e+07	117829	2.40518e+06	1.69826e+07	2.60646e+07	224999	195422	3.64065e+07
	Other		PDZ and LIM domain protein 4 OS=Homo sapiens OX=9606 GN=PDLIM4 PE=1 SV=2	PDLIM4	P50479	8.783	8	2	8	2	330	35.4	2697		2			208130					3.87995e+06		194268				265070			82947.4											1.61388e+06
	Other		PDZ and LIM domain protein 5 OS=Homo sapiens OX=9606 GN=PDLIM5 PE=1 SV=5	PDLIM5	Q96HC4	10.458	3	2	10	2	596	63.9	4460		2			200986	1.425e+06	470988	146172			634114	226059	261368	990484	883179		906685	283206	608909	468473		868995	154350	461888		246252	1.88802e+06	1.42958e+06	575305	818590
	Other		PDZ and LIM domain protein 7 OS=Homo sapiens OX=9606 GN=PDLIM7 PE=1 SV=1	PDLIM7	Q9NR12	71.521	32	9	97	9	457	49.8	47290	21.9	9	1		1.75542e+06	4.35723e+06	6.91599e+06	7.49549e+06	6.71164e+06	1.51744e+08	5.87822e+06	4.44505e+06	1.81199e+06	8.47872e+06	1.87372e+07	1.8881e+06	4.68468e+06	1.05353e+07	7.07418e+07	9.94488e+06	9.40376e+06	4.65323e+06	2.72068e+06	3.54715e+06	1.65006e+06	1.23251e+06	9.47087e+06	9.82519e+06	5.08602e+06	2.51063e+06	1.51152e+06
	Other		ATP-dependent 6-phosphofructokinase, liver type OS=Homo sapiens OX=9606 GN=PFKL PE=1 SV=6	PFKL	P17858	12.015	4	2	4	2	780	85	1780		2				523269	412227	1.8216e+06	988906	228199	5.74706e+06	232613	450197		559103	2.21516e+06	660280	683095	2.58255e+07	1.06389e+06	2.37873e+06	138608	3.95716e+06	416497	2.65921e+06			438474	118539		3.37036e+06
	Other		Profilin-1 OS=Homo sapiens OX=9606 GN=PFN1 PE=1 SV=2	PFN1	P07737	49.65	38	6	40	6	140	15	15615		6			3.18328e+06	489393		2.712e+06	4.34798e+06	3.71369e+06	4.90566e+06	1.30106e+06	1.97046e+07	3.21721e+07	3.38258e+06	4.14859e+06	3.23103e+06	2.96225e+06	4.7377e+06	3.52531e+06	3.5444e+06	1.77637e+06	4.52056e+06	4.90084e+06	4.69288e+06	345062	2.92588e+06	4.08994e+07	5.83515e+06	2.95685e+06	1.24943e+07
	Other		Phosphoglucomutase-like protein 5 OS=Homo sapiens OX=9606 GN=PGM5 PE=1 SV=2	PGM5	Q15124	57.745	18	9	45	9	567	62.2	20672		9			218740	624664	116572	1.29237e+06	2.13612e+06	1.872e+07	2.99252e+06		5.64774e+06	7.74346e+06	2.56795e+06	4.87674e+06	3.61698e+06	8.27632e+06	3.16268e+06	597566	4.5984e+06	1.1108e+06	824109	444682	526681	137912	1.04102e+07	1.58702e+06	133049	1.14645e+06	790568
	Other		Prohibitin OS=Homo sapiens OX=9606 GN=PHB PE=1 SV=1	PHB	P35232	23.067	17	5	14	4	272	29.8	5189		5			1.09324e+07	2.32445e+06	1.61939e+06	1.18732e+06	3.8809e+06	323519	1.37086e+06	2.94484e+06	659841	2.30359e+06	2.15602e+06	3.0899e+06	3.24795e+06	3.54638e+06	1.1088e+06	3.25775e+06	2.5793e+06	2.15594e+06	1.87007e+06	1.25836e+06	962045	6.44427e+06	1.11035e+06	2.52217e+06	1.22231e+06	1.22767e+06	4.51018e+06
	Other		Prohibitin-2 OS=Homo sapiens OX=9606 GN=PHB2 PE=1 SV=2	PHB2	Q99623	18.638	14	4	10	4	299	33.3	3450		4				308152	358984	209694	2.91076e+06	903144	690787	232086		9.75924e+06	309621	1.82916e+06		1.90826e+06	1.70437e+06	574641	402282		816107	1.49346e+06	886513	387763	552951	3.97319e+06		192463	654638
	Other		Polymeric immunoglobulin receptor OS=Homo sapiens OX=9606 GN=PIGR PE=1 SV=4	PIGR	P01833	47.223	15	10	52	10	764	83.2	20511		10			2.37128e+06	627363	7.4269e+06	1.36138e+06	3.62093e+06	622820	1.46303e+06	4.52954e+06	701210	3.63212e+07	3.56176e+06	1.99882e+06	1.01867e+07	2.63569e+06	371656	3.08813e+06	9.80956e+06	377933	7.16958e+06	8.48617e+06	1.36792e+06	2.33211e+07	1.46693e+06	1.09886e+06	6.48667e+06	3.20853e+07	4.78006e+06
	Other		Pyruvate kinase PKM OS=Homo sapiens OX=9606 GN=PKM PE=1 SV=4	PKM	P14618	91.566	26	12	61	12	531	57.9	26853		12			800216	1.3249e+07	1.46983e+07	8.15996e+06	1.40317e+07	6.77975e+06	2.1619e+07	2.69167e+06	4.99527e+06	2.58199e+06	2.11321e+07	3.43439e+07	2.60678e+07	2.02465e+07	8.36592e+06	7.90099e+06	4.40344e+06	3.40788e+06	1.5775e+07	1.93352e+07	1.51364e+06	3.74165e+07	2.19559e+07	2.86168e+07	8.50987e+06	6.0415e+06	4.55076e+07
	Other		Phospholipase A2, membrane associated OS=Homo sapiens OX=9606 GN=PLA2G2A PE=1 SV=2	PLA2G2A	P14555	38.346	30	4	26	4	144	16.1	11674	15.22	4	1		2.56406e+06	1.46402e+06	565035	2.63292e+07	1.2363e+06	1.92074e+06	259128	4.97228e+06	343911	3.22736e+06	2.1261e+06	395384	661295	1.04524e+06	749463	2.72934e+06	2.17016e+06	1.35025e+06	4.99615e+06	8.80362e+06	264036	3.0466e+06	747093	503507		145554	2.23313e+06
	Other		Phospholipase B-like 1 OS=Homo sapiens OX=9606 GN=PLBD1 PE=1 SV=2	PLBD1	Q6P1J6	2.497	0	1	21	1	1458	163	7748		1			750003	1.25444e+06	624312		2.99648e+06		165930		515544	1.03055e+06	294735	313592	123408			427245	115250	393436	3.44487e+06	1.3918e+06	108476	3.76438e+06	786930	3.66991e+06	1.18784e+06	4.13801e+06	3.67926e+06
	Other		Plectin OS=Homo sapiens OX=9606 GN=PLEC PE=1 SV=3	PLEC	Q15149	87.333	5	21	50	20	4684	531.5	19770		21			7.46309e+06	5.20731e+06	9.1187e+06	4.72714e+06	1.34059e+07	8.91161e+06	4.73694e+06	4.72607e+06	7.19239e+06	4.94786e+06	2.13134e+07	3.48344e+06	1.0722e+06	1.11198e+07	2.27804e+06		255566	6.87417e+06	9.10411e+06	3.87931e+06	2.42663e+06	3.10754e+06	1.49983e+07	1.06231e+07	7.65005e+06	3.9152e+06	6.02724e+06
	Other		Perilipin-4 OS=Homo sapiens OX=9606 GN=PLIN4 PE=1 SV=2	PLIN4	Q96Q06	52.162	13	10	13	10	1357	134.3	5412		10				324787	1.17598e+06	264385	493705	1.8911e+06	476519	865702		29073.8	638401	5.91304e+06	1.53053e+06	1.35883e+06	6.15827e+06		728673	5.9944e+07					277565	205025
	Other		Proteolipid protein 2 OS=Homo sapiens OX=9606 GN=PLP2 PE=1 SV=1	PLP2	Q04941	19.087	23	3	27	3	152	16.7	13047		3			761371	2.29005e+07	2.4221e+07	1.62423e+07	1.29601e+07	3.19017e+06	1.57634e+07	7.47412e+06	1.46743e+07	7.09662e+06	2.00295e+07	6.19918e+06	1.37127e+07	1.88023e+07	1.12837e+07	1.68319e+07	1.68841e+07	5.61145e+06	3.02288e+07	4.0513e+07	7.46888e+06	3.66773e+06	1.07992e+07	4.7245e+06	1.50671e+06	3.8611e+06	9.11639e+06
	Other		Phospholipid scramblase 1 OS=Homo sapiens OX=9606 GN=PLSCR1 PE=1 SV=1	PLSCR1	O15162	43.973	16	4	34	4	318	35	18512		4			394712	3.73792e+06	2.66188e+06	49351.5	4.40028e+06	486530	5.65675e+06	255399	950233	792935	3.96454e+06	1.13305e+07	2.55222e+06	1.51149e+06	334170	6.53194e+06	724430	6.51988e+06	8.16502e+06	6.65438e+06	2.16545e+06	1.02074e+07	6.26368e+06	1.08382e+07	9.7733e+06	5.45702e+06	3.7681e+06
	Other		Phospholipid phosphatase 1 OS=Homo sapiens OX=9606 GN=PLPP1 PE=1 SV=1	PPAP2A; PLPP1	O14494	54.392	18	5	60	5	284	32.1	28924		5			3.9646e+06	8.71923e+06	1.86249e+06	818877	1.48699e+06	1.58161e+06	3.63518e+06	3.24998e+06	9.76922e+06	355620	1.92284e+06	5.55734e+06	5.79845e+06	2.73599e+06	1.04315e+06	1.80938e+06	5.04149e+06	2.97024e+06	6.50177e+06	3.82463e+06	1.93241e+06	3.50867e+06	7.35292e+06	7.34574e+06	1.54261e+07	1.20566e+07	4.79484e+06
	Other		Phospholipid phosphatase 3 OS=Homo sapiens OX=9606 GN=PLPP3 PE=1 SV=1	PPAP2B; PLPP3	O14495	20.575	15	4	26	4	311	35.1	9278	3.43	3	1		737838	3.28936e+06	1.49075e+06	958866	3.07705e+06	2.28523e+06	4.999e+06	859016	963453	243746	3.66986e+06	858173	1.45292e+06	2.60369e+06	398362	4.64736e+06	1.42942e+06	1.76128e+06	2.46757e+06	2.85363e+06	1.94737e+06	676530	2.15097e+06	3.93413e+06	176768	1.55257e+06	3.56345e+06
	Other		Phospholipid phosphatase 2 OS=Homo sapiens OX=9606 GN=PLPP2 PE=1 SV=1	PPAP2C; PLPP2	O43688	19.072	10	2	2	2	288	32.6	1125		2																						1.19203e+06	836215					299801	475465
	Other		Peptidyl-prolyl cis-trans isomerase A OS=Homo sapiens OX=9606 GN=PPIA PE=1 SV=2	PPIA	P62937	15.061	20	3	8	3	165	18	1588	13.11	2	1	Met-loss+Acetyl [N-Term]	1.26316e+06	479025	470798			173038	4.29363e+06		164116		118892	165376	97778.3	156987	691547	5.7085e+06	164512	40187.4	33008.9	510177	630201	89189.6	35852.5	6.06585e+06	222117	360313	674256
	Other		Peptidyl-prolyl cis-trans isomerase B OS=Homo sapiens OX=9606 GN=PPIB PE=1 SV=2	PPIB	P23284	19.68	20	4	9	4	216	23.7	3670		4				2.11428e+06	173609	4.83919e+06	6.29447e+06	3.16729e+06	1.04535e+07		625808	1.81724e+07	269213	2.30899e+07	1.76814e+06	1.94367e+06	862531	2.01842e+06	8.61014e+06	1.0591e+06	1.31595e+07	5.87512e+06	7.93237e+06	4.02441e+06	4.65066e+06	2.75333e+07	955235	4.35856e+06	6.81383e+06
	Other		Serine/threonine-protein phosphatase PP1-beta catalytic subunit OS=Homo sapiens OX=9606 GN=PPP1CB PE=1 SV=3	PPP1CB	P62140	28.428	16	4	12	4	327	37.2	2935	15.56	3	1	Met-loss+Acetyl [N-Term]	741445	171046	109526	1.57073e+06	7.62448e+06	3.06367e+06	1.59213e+06	65607.4	77813.4		1.36732e+06	495949	277885	979294	2.25917e+06	1.81232e+06	2.37185e+06	405869	388859	500228	451619	160890	462747	5.68717e+06		2.26784e+06	4.52172e+06
	Other		Protein phosphatase 1 regulatory subunit 12C OS=Homo sapiens OX=9606 GN=PPP1R12C PE=1 SV=1	PPP1R12C	Q9BZL4	3.354	3	2	2	2	782	84.8	705		2					374411			1.13058e+06	1.30885e+06			226215	327989		1.58804e+06	574287	771073			171772			590198		227711	769433
	Other		Peroxiredoxin-1 OS=Homo sapiens OX=9606 GN=PRDX1 PE=1 SV=1	PRDX1	Q06830	66.943	45	10	133	7	199	22.1	64735		10			5.83775e+06	1.8806e+06	4.34928e+06	1.04875e+06	5.77035e+06	1.08116e+07	1.75479e+07	3.87282e+06	1.39484e+07	3.36862e+07	6.28494e+06	2.10097e+06	6.75211e+06	2.67359e+07	1.21014e+07	6.56614e+06	6.77082e+06	1.297e+07	7.97454e+06	4.39635e+06	2.21628e+06	5.78071e+06	9.83464e+06	1.66546e+07	1.73832e+07	8.17228e+06	4.84016e+06
	Other		Peroxiredoxin-4 OS=Homo sapiens OX=9606 GN=PRDX4 PE=1 SV=1	PRDX4	Q13162	49.402	24	6	59	4	271	30.5	28989		6			1.39743e+06	2.56824e+06	4.30221e+06	1.08937e+06	4.66811e+06	929442	1.38501e+06	2.87509e+06	4.20421e+06	1.0091e+07	3.17463e+06	859552	2.56632e+06	2.83299e+06	380295	3.47136e+06	1.11668e+06	4.29205e+06	7.46817e+06	1.92632e+06	1.85375e+06	3.08125e+06	2.49202e+06	1.89574e+06	5.04408e+06	2.11393e+06	4.08772e+06
	Other		Peroxiredoxin-6 OS=Homo sapiens OX=9606 GN=PRDX6 PE=1 SV=3	PRDX6	P30041	9.058	13	3	7	3	224	25	2483		3			444939	2.21537e+06	1.47998e+06	2.31062e+06		125817		3.06074e+06	1.42208e+06	1.0492e+06	1.8749e+06	5.5069e+06	5.08376e+06	3.17464e+06	3.16119e+06	3.31026e+06	3.42492e+06	1.75275e+06	2.30245e+06	1.86721e+06	4.89746e+06	4.92543e+06	2.45352e+06	1.4581e+06	2.35198e+06	1.43317e+06	1.53078e+06
	Other		Perforin-1 OS=Homo sapiens OX=9606 GN=PRF1 PE=1 SV=1	PRF1	P14222	5.011	5	2	2	2	555	61.3	698		2			175642																		240741				521292	1.48529e+06		446309
	Other		DNA-dependent protein kinase catalytic subunit OS=Homo sapiens OX=9606 GN=PRKDC PE=1 SV=3	PRKDC	P78527	92.14	4	15	38	15	4128	468.8	17219		15			1.37562e+06	4.66306e+06	3.02961e+06	564683	1.39038e+07	1.27134e+06	5.11009e+06	493065	2.28159e+06	2.21393e+06	292530	4.72854e+06	3.62992e+06	9.69509e+06	552351	6.90556e+06	203533	435538	2.24359e+06	4.03791e+06	3.86558e+06	2.41279e+06	7.40247e+06	1.54498e+07	973319	846774	1.5129e+06
	Other		Pre-mRNA-processing-splicing factor 8 OS=Homo sapiens OX=9606 GN=PRPF8 PE=1 SV=2	PRPF8	Q6P2Q9	23.669	2	4	8	4	2335	273.4	3881		4												1.05145e+06	281576		498443	1.19177e+06	190359	1.11831e+06		1.22436e+06	490145	302076	434169		632921	1.92901e+06	138334		262809
	Other		Serine protease 23 OS=Homo sapiens OX=9606 GN=PRSS23 PE=1 SV=1	PRSS23	O95084	13.406	8	3	13	3	383	43	5632	4.38	2	1		928868	2.96175e+06	4.3579e+06	2.80237e+06	1.51522e+06	590843	1.74456e+06	2.00014e+06	2.89809e+06		3.54339e+06		1.33903e+06	356860	1.71289e+06	335714	3.0858e+06	2.56739e+06	826933	1.27161e+06	271373	1.39367e+06	140968	575085		7.31437e+06	1.24904e+06
	Other		Myeloblastin OS=Homo sapiens OX=9606 GN=PRTN3 PE=1 SV=3	PRTN3	P24158	49.845	18	5	21	5	256	27.8	13387		5				434251	319388	2.31831e+06	136806	1.36379e+06	1.91945e+06	406942	73009.9	3.25246e+06	535561	267269	2.11e+06	102516	5.3806e+06	1.14917e+06		133388	1.09791e+06	484347			182245	89369.5	3.12255e+07	2.22387e+06	4.17474e+06
	Other		Prosaposin OS=Homo sapiens OX=9606 GN=PSAP PE=1 SV=2	PSAP	P07602	78.971	15	8	67	8	524	58.1	30524		8			9.52275e+06	7.53123e+06	6.59258e+06	5.76216e+06	4.30086e+06	9.58826e+06	1.38651e+07	5.6326e+06	3.80152e+07	2.3376e+06	4.64106e+06	5.45985e+06	5.95398e+06	8.1737e+06	1.33229e+06	2.37914e+07	2.08151e+06	1.13671e+07	1.00399e+07	4.03901e+07	6.58801e+06	8.31208e+06	5.42641e+06	3.49692e+07	2.47832e+07	1.89891e+06	3.22595e+06
	Other		Prostate stem cell antigen OS=Homo sapiens OX=9606 GN=PSCA PE=1 SV=2	PSCA	O43653	14.832	24	2	14	2	114	12	8664		2				4.38821e+06	5.66333e+06	1.99752e+06	2.25152e+06	38330.3	618057		2.63214e+06		524068	1.07735e+06	816732	954985		1.46068e+06				1.01955e+06	2.81498e+06						1.97566e+06
	Other		26S proteasome non-ATPase regulatory subunit 6 OS=Homo sapiens OX=9606 GN=PSMD6 PE=1 SV=1	PSMD6	Q15008	11.393	5	2	8	2	389	45.5	3838		2			298309			767345		177950	590478	3.21825e+06	6.94577e+06	2.86044e+06		913928	674007	1.12127e+06	267180	223632	597315		246301	1.17778e+06	271508	2.64028e+06	1.23551e+06	2.15266e+06		689654	797631
	Other		Polypyrimidine tract-binding protein 1 OS=Homo sapiens OX=9606 GN=PTBP1 PE=1 SV=1	PTBP1	P26599	14.52	6	3	4	3	531	57.2	2242		3				334336							373365	615855					721908		576151	387423	365241				1.1029e+06	6.60114e+06	152756		588428
	Other		Prostaglandin E synthase 3 OS=Homo sapiens OX=9606 GN=PTGES3 PE=1 SV=1	PTGES3	Q15185	17.925	18	4	36	4	160	18.7	15884		4			1.75287e+06	1.66594e+06	659300	2.99603e+06	8.5013e+06	2.1273e+06	3.81335e+06	2.49013e+06	174979	4.98009e+06	4.55702e+06	6.32686e+06	7.23656e+06	9.28648e+06	1.96152e+06	9.15946e+06	9.97027e+06	3.47167e+06	4.89794e+07	9.72086e+06	4.41517e+07	7.45639e+06	9.26805e+06	1.83389e+07	4.74083e+06	4.23045e+06	4.47299e+06
	Other		Prothymosin alpha OS=Homo sapiens OX=9606 GN=PTMA PE=1 SV=2	PTMA	P06454	12.194	27	2	17	2	111	12.2	1543	39.08	1	1	Met-loss+Acetyl [N-Term]	7.26289e+07	2.16925e+06		2.98326e+06	1.11151e+07	336983	4.86913e+06	7.65488e+06	4.48085e+06	7.08271e+06	434231	4.29158e+06	1.02585e+06	5.6628e+06	754519	1.23556e+07	2.3562e+07	9.39171e+06	1.44964e+07	5.30471e+06	807995	2.7012e+06	2.87054e+06	4.34854e+06	6.94709e+06	1.14676e+07	2.41957e+06
	Other		Very-long-chain (3R)-3-hydroxyacyl-CoA dehydratase 3 OS=Homo sapiens OX=9606 GN=HACD3 PE=1 SV=2	PTPLAD1; HACD3	Q9P035	14.401	8	2	2	2	362	43.1	1296		2			390665			95994.6		382135	396049						81416.3		162499				150896			1.07175e+06	613539	984155
	Other		Tyrosine-protein phosphatase non-receptor type 6 OS=Homo sapiens OX=9606 GN=PTPN6 PE=1 SV=1	PTPN6	P29350	12.779	3	2	3	2	595	67.5	1562		2							425642						262499			134565					1.05082e+06	1.21202e+06	542179	2.11253e+06		1.3466e+06		1.97941e+06	978651
	Other		Receptor-type tyrosine-protein phosphatase eta OS=Homo sapiens OX=9606 GN=PTPRJ PE=1 SV=3	PTPRJ	Q12913	6.797	3	3	4	3	1337	145.9	1563		3				285147	1.611e+06	772429	638277	40477.7		397328	421861	1.043e+06	108526		305873			118502	137397	189006	399348			756207	100315	620735		3.04288e+06	1.04852e+06
	Other		Caveolae-associated protein 1 OS=Homo sapiens OX=9606 GN=CAVIN1 PE=1 SV=1	PTRF; CAVIN1	Q6NZI2	50.725	18	5	19	5	390	43.5	7237		5					1.97041e+06			1.28862e+07	4.04359e+06	1.78537e+06	369249	1.41764e+06	3.67706e+06			3.14157e+06	5.879e+06		1.49168e+06	1.94627e+06		7.78819e+06				1.0865e+06	3.49186e+06	429054
	Other		Ras-related protein Rab-10 OS=Homo sapiens OX=9606 GN=RAB10 PE=1 SV=1	RAB10	P61026	27.233	25	5	112	2	200	22.5	51876		5			3.24259e+06	451049	108476	3.71174e+06	302121	939243	888557			25595.8	592608	323896	661295	881610	72607.2	2.69498e+06	787839	224565	611842	2.35856e+06	264036	739306	616035	2.27024e+06			1.05867e+06
	Other		Ras-related protein Rab-14 OS=Homo sapiens OX=9606 GN=RAB14 PE=1 SV=4	RAB14	P61106	12.876	14	3	78	2	215	23.9	29097		3			3.82856e+06	8.34713e+07	1.53126e+06	2.06651e+06	2.87091e+06	357610	2.57148e+06	9.25528e+07	1.97218e+08	864411	3.15609e+06		5.45318e+06	894459	4.00675e+06	4.81706e+06	1.2566e+07	2.02984e+06	1.3088e+06	6.66634e+06	1.80663e+06	1.87814e+06	1.03683e+07	2.18786e+06	571493	1.32667e+07	1.05381e+08
	Other		Ras-related protein Rab-1A OS=Homo sapiens OX=9606 GN=RAB1A PE=1 SV=3	RAB1A	P62820	24.569	25	6	108	3	205	22.7	49986		6			6.54394e+06	6.98244e+06	2.96915e+06	1.99848e+07	2.38221e+07	5.72728e+06	1.96426e+07	2.6788e+07	7.77766e+06	2.46421e+07	2.3494e+07	1.26781e+07	3.88133e+07	1.52871e+07	1.2725e+07	2.70011e+07	4.02563e+07	1.6774e+07	3.34055e+07	1.87371e+07	1.08955e+07	1.19506e+07	1.52191e+07	3.06487e+07	5.3792e+06	1.77831e+07	1.87929e+07
	Other		Ras-related protein Rab-3D OS=Homo sapiens OX=9606 GN=RAB3D PE=1 SV=1	RAB3D	O95716	19.151	17	4	68	2	219	24.3	31331		4			116660	1.34932e+06	2.22339e+06	386655	761627	38604.6	165892	1.21538e+07	4.8313e+06	88460.8	2.61283e+06	576948	2.48867e+06	806560	75931.4	258344	1.52727e+06		410870	96866.6	1.12596e+06	792200	1.04822e+06	224195	321654		215698
	Other		Ras-related protein Rab-5C OS=Homo sapiens OX=9606 GN=RAB5C PE=1 SV=2	RAB5C	P51148	9.159	10	2	18	2	216	23.5	7349		2			617458	444613	548221	339599	527771	948191			818733		656033	1.67442e+06	873712		843524	5.44171e+06	1.51253e+06	1.03284e+06	2.17396e+06	616646	1.06673e+06	1.97609e+06	2.17787e+06	3.96345e+06	2.16133e+06	313741	2.29158e+06
	Other		Ras-related C3 botulinum toxin substrate 1 OS=Homo sapiens OX=9606 GN=RAC1 PE=1 SV=1	RAC1	P63000	44.303	43	8	165	4	192	21.4	85329		8			8.3021e+06	1.67005e+06	1.25479e+06	1.94507e+06	1.04297e+06	1.73931e+07	3.73615e+06	1.01974e+06	3.40467e+06	1.68831e+06	1.51295e+06	336179	1.2165e+06	4.3555e+06	2.73075e+06	2.81719e+06	2.45226e+06	511903	1.08364e+06	2.47519e+06	1.95533e+06	996388	2.28463e+06	7.40772e+06	764660	1.72581e+06	488896
	Other		Ras-related C3 botulinum toxin substrate 2 OS=Homo sapiens OX=9606 GN=RAC2 PE=1 SV=1	RAC2	P15153	44.563	43	8	154	4	192	21.4	81127		8			9.10122e+06	1.62304e+07	2.11968e+07	1.55674e+07	2.36348e+07	4.76799e+06	2.99416e+07	3.49276e+07	4.04246e+07	1.78334e+07	2.27584e+07	7.4081e+06	2.94545e+07	2.11565e+07	9.43249e+06	1.17751e+07	4.06159e+07	2.17308e+07	2.83973e+07	2.11672e+07	7.03956e+06	2.81871e+07	1.75708e+07	2.5059e+07	9.24533e+06	4.37067e+07	3.43225e+07
	Other		GTP-binding nuclear protein Ran OS=Homo sapiens OX=9606 GN=RAN PE=1 SV=3	RAN	P62826	31.572	20	5	29	5	216	24.4	12156		5			3.67534e+06	2.62403e+06	296037	743628	1.36374e+06	214100	1.84945e+06	288618	1.28846e+06	7.77391e+06	709489	1.54369e+06	193234	4.62e+06	692692	1.13828e+06	5.79192e+06	1.65728e+06	2.53206e+06	2.31148e+06	1.19387e+06	6.23011e+06	2.07169e+06	1.50298e+07	183488	2.25371e+07	1.89687e+06
	Other		Ras-related protein Rap-1b OS=Homo sapiens OX=9606 GN=RAP1B PE=1 SV=1	RAP1B	P61224	42.609	30	6	56	5	184	20.8	30631		6			1.37168e+06	2.08455e+06	3.59719e+06	2.69739e+06	7.7702e+06	2.60136e+07	7.39182e+06	2.73099e+06	5.37479e+06	6.12601e+06	5.60078e+06	2.60672e+06	4.30116e+06	7.28769e+06	1.19611e+07	1.20153e+07	3.19915e+06	1.89743e+06	5.06833e+06	3.47963e+06	2.28982e+06	3.54032e+06	6.22953e+06	1.11689e+07	1.10981e+06	3.86901e+06	1.02404e+07
	Other		RNA-binding protein 14 OS=Homo sapiens OX=9606 GN=RBM14 PE=1 SV=2	RBM14; RBM14-RBM4	Q96PK6	9.214	5	3	16	3	669	69.4	4039		3			2.09809e+07	4.91569e+06	8.76406e+06	3.34456e+06	8.18119e+06	38759	1.28815e+06	1.01904e+07	6.59391e+06	908315	731776	4.82702e+06	4.03758e+06	2.01822e+06	1.9906e+06	511588	2.27063e+06	6.89892e+06	1.65756e+06	1.59318e+07	2.78634e+07	8.65324e+06	7.46074e+06	9.48941e+06	2.79913e+06	1.22411e+07	9.14304e+06
	Other		RNA-binding motif protein, X chromosome OS=Homo sapiens OX=9606 GN=RBMX PE=1 SV=3	RBMX	P38159	12.937	5	3	3	3	391	42.3	1787		3						2.96031e+06					659363		2.22027e+06	627123			194788	753111	1.88922e+06	1.24757e+06			272482	242604	5.55232e+06	4.18233e+06			429739
	Other		Protein RER1 OS=Homo sapiens OX=9606 GN=RER1 PE=1 SV=1	RER1	O15258	4.947	13	2	2	2	196	22.9	530		2					290324													222426			247082
	Other		Protein RFT1 homolog OS=Homo sapiens OX=9606 GN=RFT1 PE=1 SV=1	RFT1	Q96AA3	22.28	6	3	15	3	541	60.3	6518		3									1.1125e+06	1.21096e+07	1.52215e+07	25195.5			415962	629482	894663	1.30052e+06	3.34495e+06	7.88343e+06	100432	347789			122609	1.041e+06	1.24624e+06	1.42731e+07	6.25587e+06
	Other		Rho-related GTP-binding protein RhoC OS=Homo sapiens OX=9606 GN=RHOC PE=1 SV=1	RHOC	P08134	25.117	22	4	16	4	193	22	4286		4			776173	907462	1.7794e+06	909427	3.06146e+06	610047	3.32412e+06	4.60142e+06	1.06147e+06		5.02786e+06	5.16842e+06	3.03232e+06		728604	828745	2.82804e+06	2.21116e+06		3.59006e+06	5.39062e+06	1.51516e+06	7.86353e+06	7.97455e+06	567193	3.44111e+06	1.90211e+06
	Other		Rho-related GTP-binding protein RhoG OS=Homo sapiens OX=9606 GN=RHOG PE=1 SV=1	RHOG	P84095	23.071	19	3	53	2	191	21.3	26732		3			587790		1.11597e+06	9.16935e+06	1.16871e+07	593801	718607		1.30487e+06		1.37008e+06	2.07054e+06	2.00974e+06	1.36875e+06		427917	1.19801e+06	864768	1.35307e+07	1.60151e+06	5.14602e+06	4.38564e+06		3.09943e+06	526551
	Other		Eosinophil cationic protein OS=Homo sapiens OX=9606 GN=RNASE3 PE=1 SV=2	RNASE3	P12724	111.694	50	12	428	12	160	18.4	235841	25.15	12	1		1.63e+08	3.41815e+07	1.28707e+07	3.69979e+07	6.70136e+07	3.59961e+06	1.39223e+08	3.84276e+07	3.75584e+07	2.20217e+08	3.42976e+07	3.14718e+07	1.61033e+08	7.00253e+07	1.38458e+07	2.24323e+08	7.83208e+07	5.31009e+07	2.0251e+08	5.94421e+07	1.21121e+07	2.00636e+07	1.27815e+07	5.6163e+08	2.17733e+08	5.98555e+07	1.11627e+07
	Other		Ribonuclease 4 OS=Homo sapiens OX=9606 GN=RNASE4 PE=1 SV=3	RNASE4	P34096	11.337	20	2	4	2	147	16.8	1923		2			809984	1.13706e+06	1.13124e+06	1.38329e+06	8.22117e+06	181414		764273		642749	1.00723e+06	4.51466e+06			277777	679176	1.08025e+06	2.52476e+06	4.25979e+06	3.86032e+06	739955		426887	1.05849e+06	1.97997e+06	7.49577e+06
	Other		E3 ubiquitin-protein ligase RNF213 OS=Homo sapiens OX=9606 GN=RNF213 PE=1 SV=3	RNF213	Q63HN8	25.002	2	7	11	7	5207	591	3951		7				363932						2.64401e+06	1.0262e+06	131929								1.4672e+06		210990		425779		2.8618e+06
	Other		60S ribosomal protein L10 OS=Homo sapiens OX=9606 GN=RPL10 PE=1 SV=4	RPL10	P27635	17.624	22	3	4	3	214	24.6	2214		3									1.21768e+06								117363	300224								2.18015e+06	77764.8
	Other		60S ribosomal protein L11 OS=Homo sapiens OX=9606 GN=RPL11 PE=1 SV=2	RPL11	P62913	28.014	29	5	34	5	178	20.2	10892	3.34	4	1	Met-loss+Acetyl [N-Term]		4.82171e+06	870796	951616	3.62816e+06	3.50563e+06	3.74523e+06	37689.1	997462	4.51879e+06	467231	5.58768e+06	3.22412e+06	2.60314e+06	1.23677e+06	2.2766e+06	1.29638e+06	124936	2.71787e+06	1.74774e+06	1.26539e+06	1.01885e+06	7.86117e+06	1.48267e+07	1.27408e+06	2.97066e+06	127211
	Other		60S ribosomal protein L12 OS=Homo sapiens OX=9606 GN=RPL12 PE=1 SV=1	RPL12	P30050	30.925	34	4	8	4	165	17.8	3970		4			369239	2.77872e+06		580788	2.33452e+06	965768	2.00664e+06	1.97799e+06	174930	305872	4.82401e+06		1.44059e+06	2.56114e+07	713107	1.8117e+06	6.66474e+06		553424	2.61695e+06	1.40777e+06	1.74865e+06	1.33102e+06	1.08327e+07	414524	1.54981e+06	8.65974e+06
	Other		60S ribosomal protein L13 OS=Homo sapiens OX=9606 GN=RPL13 PE=1 SV=4	RPL13	P26373	17.767	13	3	14	3	211	24.2	6338		3						58178.4		236781		707066		50953.4	65810.2		446910	1.21074e+06	365771	447924			1.20669e+06	369426	1.19499e+06		68971.5	3.49014e+06		156150	316750
	Other		60S ribosomal protein L13a OS=Homo sapiens OX=9606 GN=RPL13A PE=1 SV=2	RPL13A	P40429	10.342	15	3	21	3	203	23.6	1769	49.37	2	1	Met-loss+Acetyl [N-Term]	656696	494271			1.8914e+08	7039909	4.21762e+06	2.52885e+06	3.40703e+06			1.23312e+08	3.04207e+06	1.04753e+08	1.02328e+06	1.66322e+06	9.81249e+06	2.19688e+06	1.66406e+06	1.8823e+08	849796	1.02693e+06	1.12792e+06	4.62267e+06	539058	5.39786e+06	4.9848e+06
	Other		60S ribosomal protein L14 OS=Homo sapiens OX=9606 GN=RPL14 PE=1 SV=4	RPL14	P50914	19.136	11	3	5	3	215	23.4	2455		3			1.14914e+06	477249	1.79827e+06	1.45621e+06		1.14115e+06	5.88907e+06	153565		3.73914e+06	2.37646e+06	2.17191e+06		267511	559037	2.50276e+06	3.07049e+06	1.72933e+06	1.80746e+06	353455	387815	4.17596e+06	725726	8.77738e+06		7.50006e+06
	Other		60S ribosomal protein L15 OS=Homo sapiens OX=9606 GN=RPL15 PE=1 SV=2	RPL15	P61313	29.625	22	5	36	5	204	24.1	13550		5			4.574e+06	9.62799e+07	3.09652e+08	5.4869e+06	7.06385e+07	1.46877e+06	8.03079e+06	2.75934e+06	4.17326e+06	6.16663e+07	2.2314e+08	3.5082e+06	1.5753e+07	8.24456e+06	2.32042e+06	7.05277e+06	8.66003e+06	2.82077e+06	1.06176e+07	9.17383e+06	5.1932e+06	7.2132e+07	6.93716e+06	8.80223e+06	7.32871e+06	7.07188e+06	781351
	Other		60S ribosomal protein L18 OS=Homo sapiens OX=9606 GN=RPL18 PE=1 SV=2	RPL18	Q07020	40.301	31	6	57	6	188	21.6	16365		6			1.59438e+06	1.10331e+06	1.35817e+06	1.99285e+06	3.13189e+06	4.09218e+06	3.43877e+06	1.30121e+06	986764	1.09568e+07	472800	2.00839e+06	5.61134e+06	7.28683e+06	1.26294e+07	3.61227e+06	4.78349e+06	1.15506e+06	5.40212e+06	1.28001e+06	2.51955e+06	3.08985e+06	5.19378e+06	1.92997e+07	374280	2.92484e+06	852153
	Other		60S ribosomal protein L18a OS=Homo sapiens OX=9606 GN=RPL18A PE=1 SV=2	RPL18A	Q02543	37.222	35	6	41	6	176	20.7	17646		6			2.17793e+06	1.02925e+07	2.38152e+06	466737	6.5551e+06	8.87911e+06	9.278e+06	2.40493e+06	3.15878e+06	9.71859e+06	3.7546e+06	6.45647e+06	7.85766e+06	9.42475e+06	3.65145e+06	3.66522e+06	4.99724e+06	2.22716e+06	5.48057e+06	4.18006e+06	7.80857e+06	1.23624e+07	1.53126e+06	1.03503e+07	2.70081e+06	3.52897e+06	1.83525e+06
	Other		60S ribosomal protein L22 OS=Homo sapiens OX=9606 GN=RPL22 PE=1 SV=2	RPL22	P35268	10.034	19	2	6	2	128	14.8	2514		2				415634	9.03581e+06		209352	257633	137292	660136	739658				108787	1.36793e+06		481128	211669		267300		150170		163630	2.60154e+06
	Other		60S ribosomal protein L23 OS=Homo sapiens OX=9606 GN=RPL23 PE=1 SV=1	RPL23	P62829	41.917	36	4	13	4	140	14.9	5907		4			703697		242210	776575	221794	1.67047e+06	6.42899e+06	3.11427e+06	4.06918e+06	2.56805e+06	1.51845e+06		1.84716e+06	2.1876e+06	3.81752e+06	3.63402e+06	3.02181e+06	5.21632e+06	2.1523e+06	472385	969463		1.02087e+06	2.16435e+07	862753	6.396e+06
	Other		60S ribosomal protein L24 OS=Homo sapiens OX=9606 GN=RPL24 PE=1 SV=1	RPL24	P83731	16.859	20	3	7	3	157	17.8	3619		3			943791		206399	343010	1.19103e+06	3.63975e+06	1.5121e+06	83768.1		243574	351745	1.70393e+06	1.41398e+06	2.09823e+06	486495	635445			5.27409e+06	1.40191e+06	495938	3.65988e+06	934774	4.36893e+06	1.41988e+06		7.04705e+06
	Other		60S ribosomal protein L27a OS=Homo sapiens OX=9606 GN=RPL27A PE=1 SV=2	RPL27A	P46776	20.48	22	3	31	3	148	16.6	14655		3				1.00981e+06	349878	289836	548540	175151	4.45366e+06	2.19282e+06	1.93981e+06	5.43601e+06	361137		3.16832e+06	2.54074e+06	1.30932e+06	5.00333e+06	2.66052e+06	1.72886e+06	3.0575e+06	1.72639e+06	775267	966297	1.8511e+06	7.35837e+06	2.242e+06	603721	241196
	Other		60S ribosomal protein L3 OS=Homo sapiens OX=9606 GN=RPL3 PE=1 SV=2	RPL3	P39023	8.426	6	2	3	2	403	46.1	1054		2					112490			94216.1	415625	484179	820570	133494					109454							278246		1.31801e+06		620622
	Other		60S ribosomal protein L30 OS=Homo sapiens OX=9606 GN=RPL30 PE=1 SV=2	RPL30	P62888	19.663	31	3	20	3	115	12.8	9035		3			4.20697e+06	673007	1.43466e+06	1.51966e+06	1.41397e+06	717415	4.79744e+06	3.51657e+06	4.55285e+06	3.10278e+06	7.9417e+06	265380	9.35514e+06	2.64345e+06	103713	5.91704e+06	699032	9.61508e+06	3.32026e+06	2.64447e+06	3.59241e+06	8.69266e+06	6.96863e+06	1.22501e+07	1.35478e+06	1.99519e+06	7.7403e+07
	Other		60S ribosomal protein L35a OS=Homo sapiens OX=9606 GN=RPL35A PE=1 SV=2	RPL35A	P18077	9.28	15	2	11	2	110	12.5	5476		2			782773	2.17324e+06	694537	944466	1.24387e+06	29881.5	1.14916e+06	675009	966643	4.22272e+06	6.3119e+06	265723	794125	3.97863e+06	3.71603e+06	1.47302e+06	1.25686e+06		2.47923e+06	2.88996e+06	140522	602177	464220	2.74102e+06	314514	1.04053e+06	252126
	Other		60S ribosomal protein L4 OS=Homo sapiens OX=9606 GN=RPL4 PE=1 SV=5	RPL4	P36578	18.941	10	3	9	3	427	47.7	4015		3								1.84429e+06	4.48521e+06			1.22783e+06			417586	2.97879e+06	1.4531e+06				1.10479e+06		585207		230370	6.65196e+06
	Other		60S ribosomal protein L5 OS=Homo sapiens OX=9606 GN=RPL5 PE=1 SV=3	RPL5	P46777	18.767	13	4	15	4	297	34.3	5562		4			1.32246e+06	3.31402e+06	3.10352e+06	2.77383e+06	1.97217e+06	2.07575e+06	1.66126e+06	1.27391e+06	2.89532e+06	116802	5.4187e+06	1.16543e+06	458059	1.1392e+06	1.14841e+06	717329	4.52019e+06	5.94866e+06	1.23619e+06	917591	915483	3.69799e+06	1.34634e+07	4.53859e+06	1.74345e+06	5.45293e+06	3.80099e+06
	Other		60S ribosomal protein L6 OS=Homo sapiens OX=9606 GN=RPL6 PE=1 SV=3	RPL6	Q02878	60.123	26	8	44	8	288	32.7	23359		8			755585	2.07367e+06	2.47439e+06	1.28562e+06	3.4103e+06	1.27657e+06	3.80765e+06	2.92018e+06	4.42041e+06	3.63267e+06	1.50003e+06	1.74679e+06	4.38614e+06	3.98611e+06	574216	1.52844e+06	9.27816e+06	2.31727e+06	4.37661e+06	2.52071e+06	1.65577e+06	1.85837e+06	2.23032e+06	6.29196e+06	113704	7.60182e+06
	Other		60S ribosomal protein L7 OS=Homo sapiens OX=9606 GN=RPL7 PE=1 SV=1	RPL7	P18124	16.286	12	3	31	3	248	29.2	14398		3			1.105e+06	589863	387097	364515	1.12363e+06	1.90914e+06	3.84485e+06	685196	1.24777e+06	7.15908e+06	365062	760910	2.67718e+06	4.57275e+06	766172	1.78074e+06	2.92529e+06	2.30991e+06	2.96163e+06	1.26664e+06	201207	108052	2.90522e+06	4.11028e+06		3.10709e+06	396939
	Other		60S ribosomal protein L7a OS=Homo sapiens OX=9606 GN=RPL7A PE=1 SV=2	RPL7A	P62424	31.33	17	5	17	5	266	30	8383		5				198045	249988	62134.4	1.40194e+06	775876	4.85017e+06	161824		4.68878e+06	568067	1.15212e+06	1.10653e+06	4.80279e+06	1.15226e+06	2.14029e+06	1.80588e+07	39493.3	3.23477e+06	1.18836e+06	592330	271128	553327	1.14992e+07	72627.4		699879
	Other		60S ribosomal protein L8 OS=Homo sapiens OX=9606 GN=RPL8 PE=1 SV=2	RPL8	P62917	12.438	11	2	15	2	257	28	9148		2				2.07687e+06	2.47235e+06	2.51665e+06	3.02132e+06	172762	4.04686e+06	2.41698e+06	3.13189e+06		2.39509e+06		6.09524e+06	1.48346e+06	1.03105e+06	1.44994e+06	4.60475e+06	2.319e+06				2.26026e+06	916534	5.8009e+06	1.33422e+06	1.45468e+06	1.10713e+06
	Other		60S ribosomal protein L9 OS=Homo sapiens OX=9606 GN=RPL9 PE=1 SV=1	RPL9	P32969	16.476	16	3	18	3	192	21.9	5846		3				170706	884418		1.15738e+06	1.55872e+06	4.73621e+06	949353			325564		2.50322e+06	3.1628e+06	1.89419e+06	2.83328e+06	2.04659e+06	758526	1.63943e+06	533026	1.41343e+06	521977	8.69162e+06	5.3556e+06	115914	7332.7	132026
	Other		Dolichyl-diphosphooligosaccharide--protein glycosyltransferase subunit 1 OS=Homo sapiens OX=9606 GN=RPN1 PE=1 SV=1	RPN1	P04843	17.451	5	3	12	3	607	68.5	4994		3			715364		744451	166478	484603	81196.7	2.67068e+06	1.25188e+06		1.83506e+06	622850	464376	1.20451e+06	2.82382e+06	594397	2.77802e+06	1.27056e+06		1.33004e+06	2.45003e+06	870564		1.22514e+06	6.93674e+06			1.35949e+06
	Other		Dolichyl-diphosphooligosaccharide--protein glycosyltransferase subunit 2 OS=Homo sapiens OX=9606 GN=RPN2 PE=1 SV=3	RPN2	P04844	54.517	16	8	35	8	631	69.2	14574		8			571331	1.6378e+06	1.28847e+06	2.16828e+06	1.53258e+06	218968	6.48665e+06	1.60612e+06	1.78093e+06	5.04273e+06	1.79052e+06	394244	1.15412e+06	4.94277e+06	1.10222e+06	3.12491e+06	7.15195e+06		2.95769e+06	4.26853e+06	1.20433e+06	3.42722e+06	2.02235e+06	5.73977e+06	970285	1.92976e+06	3.46969e+06
	Other		40S ribosomal protein S11 OS=Homo sapiens OX=9606 GN=RPS11 PE=1 SV=3	RPS11	P62280	64.977	41	8	63	8	158	18.4	35154		8			7.02333e+06	1.4986e+06	2.44155e+06	3.88486e+06	5.10783e+06	1.34552e+06	7.47958e+06	2.38601e+06	4.28675e+06	3.272e+08	2.75412e+06	819589	7.55612e+06	5.0062e+06	3.75651e+06	1.1243e+07	4.98786e+06	6.07133e+06	4.67747e+06	3.63039e+06	1.49391e+06	4.45445e+06	3.87822e+06	3.39159e+07	886708	1.39879e+06	6.57485e+06
	Other		40S ribosomal protein S12 OS=Homo sapiens OX=9606 GN=RPS12 PE=1 SV=3	RPS12	P25398	33.346	46	5	30	5	132	14.5	12019	17.92	4	1	Met-loss+Acetyl [N-Term]	4.29961e+07	2.83642e+06	3.25361e+06	7.81226e+06	6.28139e+06	6.7843e+06	1.05349e+07	1.79864e+06	5.40441e+06	1.47289e+06	5.23788e+06	2.60355e+06	6.9914e+06	5.70337e+06	1.21539e+06	4.84718e+06	7.04831e+06	3.69398e+06	4.59299e+06	2.68162e+06	1.25879e+06	4.00239e+06	2.90221e+06	1.60043e+07	2.26774e+06	2.50569e+06	3.27586e+06
	Other		40S ribosomal protein S15a OS=Homo sapiens OX=9606 GN=RPS15A PE=1 SV=2	RPS15A	P62244	42.042	32	6	98	6	130	14.8	54102		6			6.08216e+06	6.06935e+06	6.49395e+06	3.16386e+06	3.12918e+06	1.02681e+07	2.00595e+07	4.53645e+06	1.08664e+07	9.72647e+06	3.24143e+06	3.69936e+06	1.40111e+07	8.96658e+06	3.91451e+06	2.15474e+07	1.37303e+07	8.74335e+06	1.20738e+07	5.0543e+06	2.21205e+06	8.06662e+06	2.79712e+06	1.67697e+07	3.71767e+06	3.46224e+07	4.66754e+07
	Other		40S ribosomal protein S16 OS=Homo sapiens OX=9606 GN=RPS16 PE=1 SV=2	RPS16	P62249	34.362	40	7	41	7	146	16.4	25822		7			6.89094e+06	3.52392e+06	1.23719e+06	4.06159e+06	1.27694e+06	883521	2.8378e+06	1.46121e+06	5.63454e+06	3.11084e+06	3.29365e+06	1.65428e+07	3.46362e+06	2.01804e+07	812032	233167	4.75144e+06	1.12307e+06	1.36191e+07	6.50202e+06	2.02933e+07	1.3846e+06	1.4523e+06	2.75262e+06	261754	3.94719e+06	5.5564e+06
	Other		40S ribosomal protein S2 OS=Homo sapiens OX=9606 GN=RPS2 PE=1 SV=2	RPS2	P15880	49.464	24	8	47	8	293	31.3	26228		8			2.52312e+06	2.62935e+06	3.01744e+06	3.09939e+06	5.27154e+06	3.48792e+06	8.63105e+06	2.7511e+06	1.41131e+06	9.19202e+06	4.73538e+06	6.08172e+06	7.07831e+06	9.08268e+06	3.17799e+06	4.42545e+06	9.03316e+06	2.68092e+06	1.02478e+07	5.92016e+06	2.96648e+06	1.68069e+06	5.69178e+06	1.20279e+07	8.10842e+06	5.37242e+06	918778
	Other		40S ribosomal protein S20 OS=Homo sapiens OX=9606 GN=RPS20 PE=1 SV=1	RPS20	P60866	10.934	16	2	5	2	119	13.4	2437		2								1.29449e+06							878509		243336		502988		148053			3.80781e+06	6.58294e+06	3.82183e+06			450268
	Other		40S ribosomal protein S26 OS=Homo sapiens OX=9606 GN=RPS26 PE=1 SV=3	RPS26; LOC101929876; RPS26P25	P62854	13.288	27	3	20	3	115	13	12312		3			591068	1.77251e+06	1.00948e+06	1.5267e+06	2.16582e+06	2.84957e+06	5.16519e+06	2.59597e+06	1.40074e+06	8.60057e+06	1.36105e+06	1.84859e+06	5.14794e+06	5.11516e+06	515483		4.34557e+06	460044	1.86345e+06	839674	902413	987887	2.64199e+06	6.0975e+06
	Other		40S ribosomal protein S3 OS=Homo sapiens OX=9606 GN=RPS3 PE=1 SV=2	RPS3	P23396	76.311	52	13	110	13	243	26.7	52449		13			6.71271e+06	3.57774e+06	2.07821e+06	4.05963e+06	4.22912e+06	1.6542e+07	1.48164e+07	6.4445e+06	8.93127e+06	1.62924e+07	4.82806e+06	5.65095e+06	1.23875e+07	8.78787e+06	6.15829e+06	8.68948e+06	1.32152e+07	5.98185e+06	9.50521e+06	1.24558e+07	5.05487e+06	7.35735e+06	4.40037e+06	6.61919e+07	4.07356e+06	9.18964e+06	5.8849e+06
	Other		40S ribosomal protein S3a OS=Homo sapiens OX=9606 GN=RPS3A PE=1 SV=2	RPS3A	P61247	15.79	9	3	27	3	264	29.9	14431		3				750672	1.67245e+06	1.9014e+06	2.82692e+06	602524	3.77403e+06	1.50587e+06	1.73856e+06	664239	1.37363e+06	160490	5.29149e+06	3.20908e+06	991790	1.74774e+06	3.08559e+06	1.91922e+06	2.08196e+06	7.31998e+06	845652	5.13469e+06	2.69657e+06	8.59042e+06	225787	2.04046e+06	6.70301e+06
	Other		40S ribosomal protein S4, X isoform OS=Homo sapiens OX=9606 GN=RPS4X PE=1 SV=2	RPS4X	P62701	43.386	27	7	58	5	263	29.6	21868		7			5.80959e+06	2.75619e+06	2.18704e+06	1.05245e+06	6.0334e+06	2.73372e+06	6.17197e+06	1.93945e+06	1.23195e+07	2.75387e+07	2.31536e+06	780633	4.99023e+06	6.66319e+06	1.59051e+06	6.97377e+06	1.87748e+06	1.24102e+07	6.55052e+06	3.63892e+06	496937	6.47084e+06	3.67355e+06	1.98885e+07	4.07704e+06	8.57323e+06	3.46666e+06
	Other		40S ribosomal protein S5 OS=Homo sapiens OX=9606 GN=RPS5 PE=1 SV=4	RPS5	P46782	33.604	16	3	19	3	204	22.9	12888		3			4.13752e+06	385876	1.89906e+06		1.70992e+06	273974	2.77747e+06	59413.7	169207		1.14851e+06	354895	555661	5.97076e+06		3.47836e+06	37058.2	56605.2	2.74132e+06	2.0006e+06	460825	3.35172e+06	2.94884e+06	3.93941e+06	405693	549350	321358
	Other		40S ribosomal protein S6 OS=Homo sapiens OX=9606 GN=RPS6 PE=1 SV=1	RPS6	P62753	26.252	20	5	33	5	249	28.7	13284		5			5.24473e+06	1.70979e+06	1.89364e+06	1.29321e+06	4.57807e+06	2.19126e+06	8.73102e+06	1.14942e+06	1.51211e+06	5.5411e+06	1.84706e+06	777498	4.43623e+06	3.45192e+06	2.25477e+06	2.30079e+06	5.15398e+06	2.70758e+06	3.03593e+06	1.37956e+06	1.37239e+06	1.97685e+06	3.25882e+06	4.89637e+06	1.18238e+06	1.79453e+06	191347
	Other		40S ribosomal protein S8 OS=Homo sapiens OX=9606 GN=RPS8 PE=1 SV=2	RPS8	P62241	32.546	23	4	26	4	208	24.2	9892		4			750353	707991		771842	1.96724e+06	3.20502e+06	3.53471e+06	445343	643302	2.97906e+06	1.0938e+06	1.14735e+07	5.08205e+06	3.67424e+06	1.18441e+06	6.24265e+06	6.0994e+06	547072	1.47513e+06	5.66926e+06	1.05584e+07	482413	568737	6.43993e+06	1.08843e+06	979257	2.49317e+06
	Other		40S ribosomal protein S9 OS=Homo sapiens OX=9606 GN=RPS9 PE=1 SV=3	RPS9	P46781	37.619	26	6	65	6	194	22.6	35075		6			1.98459e+06	2.31476e+06	1.02657e+06	3.39338e+06	911922	7.23342e+06	7.04244e+06	4.09439e+06	9.59613e+06	3.96957e+06	1.93299e+06		6.32775e+06	6.39581e+06	2.67541e+06	2.22996e+06	5.56253e+06	3.16122e+06	5.08495e+06	3.78563e+06	1.53763e+06	2.78392e+06	3.10978e+06	2.10878e+07	209585	4.67082e+06	3.65583e+06
	Other		Ras-related protein R-Ras OS=Homo sapiens OX=9606 GN=RRAS PE=1 SV=1	RRAS	P10301	26.408	22	4	17	4	218	23.5	9828		4				715705	1.6248e+06	474043	772531	7.58423e+06	2.98685e+06		1.02903e+06	2.587e+06	1.19774e+06			1.0277e+06	1.62404e+06	1.09532e+06	1.86918e+06	836377	206008	460342	241943		1.70529e+06
	Other		Deoxynucleoside triphosphate triphosphohydrolase SAMHD1 OS=Homo sapiens OX=9606 GN=SAMHD1 PE=1 SV=2	SAMHD1	Q9Y3Z3	14.612	5	3	13	3	626	72.2	4677		3			2.24226e+07	2.96812e+07	2.93938e+07	2.57236e+07	1.78478e+07	1.37715e+06	5.12003e+06	7.34418e+07	6.68502e+07	1.03425e+06	2.17722e+07	1.9195e+07	2.14947e+07	1.86559e+07	1.25826e+07	1.43561e+07	2.77058e+07	4.5252e+07	2.65432e+07	3.22996e+07	1.35754e+07	2.4768e+07	1.86773e+07	1.18332e+07	7.6053e+06	7.85504e+07	4.59305e+07
	Other		Sorting and assembly machinery component 50 homolog OS=Homo sapiens OX=9606 GN=SAMM50 PE=1 SV=3	SAMM50	Q9Y512	8.298	3	2	4	2	469	51.9	1442		2			230434		441620			375945				1.9113e+06			162635		240505		133585		245650				939170
	Other		Secretory carrier-associated membrane protein 4 OS=Homo sapiens OX=9606 GN=SCAMP4 PE=1 SV=1	SCAMP4	Q969E2	11.838	10	3	35	3	229	25.7	12883	3.56	2	1	Met-loss+Acetyl [N-Term]	9.4765e+06	1.79085e+06	1.29997e+06	2.14344e+06	602814	609491	2.10551e+06	485069	1.71288e+06	1.21281e+06	1.8614e+06	1.54236e+06	3.13994e+06	796778		2.46212e+06	765678		1.7369e+06	3.20927e+06	773292	3.31811e+06	1.05562e+06	3.17717e+06	802024	1.62533e+06	3.29512e+06
	Other		Lysosome membrane protein 2 OS=Homo sapiens OX=9606 GN=SCARB2 PE=1 SV=2	SCARB2	Q9NVU7	1.868	1	1	1	1	687	79.8	248		1			1.86428e+07	1.83927e+07	2.2701e+07	2.20063e+07	3.12191e+07	1.1879e+07	2.14872e+07	2.38106e+07	3.527e+07	1.42169e+06	3.47973e+07	3.05062e+07	2.85333e+07	1.75155e+07	1.13042e+07	2.62097e+07	2.42918e+07	3.18306e+07	1.66583e+07	2.96937e+07	2.67634e+07	4.24741e+07	2.87351e+07	2.62609e+07	3.04989e+07	2.91699e+07	7.97116e+07
	Other		Succinate dehydrogenase [ubiquinone] flavoprotein subunit, mitochondrial OS=Homo sapiens OX=9606 GN=SDHA PE=1 SV=2	SDHA	P31040	39.233	14	7	16	7	664	72.6	6822		7			1.94722e+06	3.58508e+06	4.16249e+06	1.69629e+06	2.09934e+06	619399	8.68504e+06	1.63824e+06	136151	8.07368e+06	6.07157e+06	1.97675e+06	3.86335e+06	6.87719e+06	7.23506e+06	7.89146e+06	1.86016e+06	1.03531e+06	1.37565e+06	3.2223e+06	1.09974e+06	5.85397e+06	2.98267e+06	4.22037e+06	1.56007e+06	3.59945e+06
	Other		Succinate dehydrogenase [ubiquinone] iron-sulfur subunit, mitochondrial OS=Homo sapiens OX=9606 GN=SDHB PE=1 SV=3	SDHB	P21912	19.953	10	3	88	3	280	31.6	35486		3			69449.4	6.83747e+07	3.13855e+07	565005	9.27629e+07	52193.6	5.09815e+06	1.09422e+07	9.55968e+06	1.32725e+07	1.79917e+08	6.17162e+07	4.26067e+07	1.23798e+07	1.00569e+06	1.39673e+06	1.34942e+07	2.13327e+07	5.74531e+07	1.90785e+07	1.31482e+07	1.29344e+08	9.40877e+07	2.49126e+06	3.45888e+06	1.56469e+08	5.93066e+07
	Other		Vesicle-trafficking protein SEC22b OS=Homo sapiens OX=9606 GN=SEC22B PE=1 SV=4	SEC22B	O75396	10.7	10	2	2	2	215	24.6	907		2								846702	381561	1.50923e+06		262079	344087				116844	324960	371636	502677	210078	351941		755639		1.13919e+06		1.95058e+06	445943
	Other		Protein transport protein Sec23A OS=Homo sapiens OX=9606 GN=SEC23A PE=1 SV=2	SEC23A	Q15436	22.077	8	5	9	4	765	86.1	3338		5				273427		1.46737e+06	449969	612161	2.21526e+06		288004	362011	1.44302e+06	516103	1.06625e+06	728629	195348	335636	655757	232278	1.26912e+06	684891	887948	1.33796e+06	1.21527e+06	1.27292e+07	1.83005e+06	2.58395e+06	2.38778e+06
	Other		Protein transport protein Sec23B OS=Homo sapiens OX=9606 GN=SEC23B PE=1 SV=2	SEC23B	Q15437	17.466	5	3	7	2	767	86.4	3469		3							477446		75068.7				70901.3	403278							293844					904476
	Other		Protein transport protein Sec31A OS=Homo sapiens OX=9606 GN=SEC31A PE=1 SV=3	SEC31A	O94979	23.048	3	4	6	4	1220	132.9	3035		4			630793	767487	648216	253870	274480	1.75861e+06	630656	113410		309624	819062		1.47322e+06	2.3775e+06	1.19778e+06	280670	165152	431218	1.31968e+06	811006	1.95968e+06		1.2164e+06	6.3462e+06	276658	1.40139e+06	1.04979e+06
	Other		Protein transport protein Sec61 subunit alpha isoform 1 OS=Homo sapiens OX=9606 GN=SEC61A1 PE=1 SV=2	SEC61A1	P61619	52.001	16	8	61	8	476	52.2	29833		8			504171	2.85764e+06	2.34419e+06	8.16677e+06	5.32877e+06	18681.7	1.34529e+07	1.10829e+06	3.87826e+06	625345	5.67091e+07	9.8549e+06	8.64317e+06	9.69148e+06	338582	1.0658e+07	7.58385e+06	2.12688e+06	8.73613e+06	1.50909e+07	7.33112e+06	2.06373e+07	9.31048e+06	2.53687e+07	3.23389e+06	3.67054e+06	1.28462e+07
	Other		Translocation protein SEC62 OS=Homo sapiens OX=9606 GN=SEC62 PE=1 SV=1	SEC62	Q99442	48.332	12	7	125	7	399	45.8	65209		7			2.56372e+07	1.22681e+07	1.05536e+07	6.15379e+06	1.37786e+07	306139	1.01899e+07	1.36504e+07	2.56714e+07	6.18958e+06	1.04092e+07	1.25512e+07	5.73659e+06	8.94946e+06	930050	7.6447e+06	8.85973e+06	1.52683e+07	1.85679e+07	2.00428e+07	5.16863e+06	1.37496e+07	4.54164e+06	1.64616e+07	1.22724e+07	1.94694e+07	2.35559e+07
	Other		Septin-2 OS=Homo sapiens OX=9606 GN=SEPTIN2 PE=1 SV=1	SEPT2	Q15019	15.526	13	4	10	2	361	41.5	3677		4								1.7869e+06					351937			926978	760981									463177		1.60114e+06
	Other		Septin-7 OS=Homo sapiens OX=9606 GN=SEPTIN7 PE=1 SV=2	SEPT7	Q16181	13.486	6	3	7	2	437	50.6	4023		3								4.31246e+06	1.05269e+06				1.90557e+06		368070	1.74987e+06	1.79895e+07			2.42105e+06		209788	325084	362766		2.23496e+06
	Other		Splicing factor 3B subunit 1 OS=Homo sapiens OX=9606 GN=SF3B1 PE=1 SV=3	SF3B1	O75533	25.361	4	5	22	5	1304	145.7	7979		5			1.85131e+06	2.47056e+06	3.22517e+06	1.38859e+06	2.08859e+06	90812.4	4.00651e+06	3.0922e+06	5.5334e+06	1.12943e+06	7.18152e+06	9.56904e+06	5.6049e+06	4.66241e+06	2.69394e+06	4.80303e+06	7.43589e+06	9.86496e+06	2.70323e+06	4.57366e+06	6.54623e+06	5.42049e+06	1.11083e+07	6.53086e+06	4.44779e+06	1.92901e+07	1.02837e+07
	Other		Splicing factor, proline- and glutamine-rich OS=Homo sapiens OX=9606 GN=SFPQ PE=1 SV=2	SFPQ	P23246	16.478	4	2	3	2	707	76.1	1559		2								756856			105943													1.66139e+06		2.94174e+06	772325
	Other		Protein Shroom3 OS=Homo sapiens OX=9606 GN=SHROOM3 PE=1 SV=2	SHROOM3	Q8TF72	8.053	1	2	10	2	1996	216.7	3968		2			479657	2.8924e+06	1.83471e+06	517217	1.66163e+06	21219.3	1.68441e+06	9.92516e+06	1.84024e+07	300222	1.20849e+06	188138	218636	382648	1.37289e+06	5.011e+06	3.31404e+06	1.24075e+07	534107	759464		315100	188351	1.08184e+06	759630	2.0395e+07	1.18413e+07
	Other		Sucrase-isomaltase, intestinal OS=Homo sapiens OX=9606 GN=SI PE=1 SV=6	SI	P14410	67.693	9	13	21	13	1827	209.3	8993	6.09	12	2		6.92527e+06		648351	2.50339e+06	1.10787e+06	1.60422e+06	3.40059e+06	135079		1.68459e+06	3.75824e+06	1.07755e+06	2.19161e+06	140033	967315	4.32988e+07	1.37829e+07	925744	971768	2.077e+06	349968		261423		530147	2.57767e+06	5.69458e+06
	Other		Signal-regulatory protein beta-1 isoform 3 OS=Homo sapiens OX=9606 GN=SIRPB1 PE=1 SV=1	SIRPB1	Q5TFQ8	21.392	9	3	6	3	398	43.3	2198		3				876715	596245	360064	1.66232e+06		542644	768294	2.57778e+06	141411	574464	606097		442091		318497			1.09822e+06	1.70089e+06		1.91521e+06		1.27262e+06		1.98946e+06	1.82666e+06
	Other		Tricarboxylate transport protein, mitochondrial OS=Homo sapiens OX=9606 GN=SLC25A1 PE=1 SV=2	SLC25A1	P53007	10.222	9	3	12	3	311	34	4157		3			163171	1.27027e+06	1.04753e+06	879921	627890	833849	2.6789e+06	805342	1.30769e+06	4.78434e+06	2.26025e+06	300674	1.51465e+06	9.1115e+06	400314	435407	1.56993e+06	954920	2.61705e+06	2.32371e+06	1.39392e+06	279000	3.38849e+06	223047		6.85148e+06
	Other		Mitochondrial 2-oxoglutarate/malate carrier protein OS=Homo sapiens OX=9606 GN=SLC25A11 PE=1 SV=3	SLC25A11	Q02978	13.071	7	2	6	2	314	34	2119		2									1.88007e+06	135146		3.28473e+06	234813	1.41233e+06		815032	764090	1.3596e+06	564796							795766
	Other		Phosphate carrier protein, mitochondrial OS=Homo sapiens OX=9606 GN=SLC25A3 PE=1 SV=2	SLC25A3	Q00325	20.243	11	5	24	5	362	40.1	11809		5				2.04162e+06	892608	417685	676317	5.39329e+06	5.4648e+06	277858	721240	1.12352e+06	338756	891359	866364	2.19869e+06	2.70437e+06	2.48545e+06	2.08922e+06		1.15891e+06	5.99042e+06	1.47097e+06	730262	2.25925e+06	7.06333e+06	859466	668557	1.50213e+06
	Other		ADP/ATP translocase 1 OS=Homo sapiens OX=9606 GN=SLC25A4 PE=1 SV=4	SLC25A4	P12235	105.22	51	18	110	5	298	33	59379	5.63	17	1	Met-loss+Acetyl [N-Term]	1.42383e+07	1.64339e+07	2.28925e+06	306476	1.23151e+07	1.66799e+07	1.60657e+06	36823.4	304112	1.2775e+07	3.64513e+06	1.03455e+06	9.78982e+06	1.16832e+07	3.24242e+07	3.58596e+06	1.33581e+07	6.62987e+06	5.40756e+06	547032	504896	495212	4.67025e+06	7.09308e+06	4.448e+06	6.9296e+06	403395
	Other		ADP/ATP translocase 2 OS=Homo sapiens OX=9606 GN=SLC25A5 PE=1 SV=7	SLC25A5	P05141	120.751	56	21	188	6	298	32.8	93167	12.72	20	1	Met-loss+Acetyl [N-Term]	6.37278e+07	1.78902e+07	2.11338e+07	1.76419e+07	1.6435e+07	1.95807e+07	4.75601e+07	5.862e+06	7.39842e+06	1.56245e+07	1.09559e+07	2.37987e+07	1.33381e+07	4.28389e+07	2.62359e+07	2.88962e+07	1.85426e+07	6.06419e+06	2.78527e+07	2.6965e+07	1.80647e+07	1.31463e+07	2.14128e+07	7.93042e+07	5.35e+06	7.51053e+06	1.85604e+07
	Other		ADP/ATP translocase 3 OS=Homo sapiens OX=9606 GN=SLC25A6 PE=1 SV=4	SLC25A6	P12236	95.665	47	17	143	3	298	32.8	76496	2.48	16	1	Met-loss+Acetyl [N-Term]		154164	261557	170336		2.88301e+06	1.62581e+06				164119	555024	251964	936509	1.55028e+06	956101				749678	1.11491e+06		728558	6.871e+06			122584
	Other		Solute carrier family 27 member 3 OS=Homo sapiens OX=9606 GN=SLC27A3 PE=1 SV=4	SLC27A3	Q5K4L6	11.482	4	2	4	2	683	73.5	1476		2			2.91998e+07	1.90443e+08	9.23436e+07	5.36913e+07	1.11876e+08	2274794	8.33315e+07	5.51774e+08	6.17898e+08		1.11517e+08	5.81558e+07	3.37478e+07	2.98575e+07	6.47695e+07	2.28293e+08	1.89545e+08	5.30467e+08	4.01892e+07	7.54225e+07	2.82938e+07	9.16394e+07	2.09593e+07	9.15697e+07	5.46057e+07	1.01355e+09	4.86972e+08
	Other		Adenosine 3'-phospho 5'-phosphosulfate transporter 1 OS=Homo sapiens OX=9606 GN=SLC35B2 PE=1 SV=1	SLC35B2	Q8TB61	12.269	5	2	8	2	432	47.5	3411		2								15683.8	1.32921e+06					489541	1.21671e+06	2.11909e+06		283562			1.00166e+06	1.78632e+06	1.26868e+06		370142	1.44297e+06
	Other		Choline transporter-like protein 2 OS=Homo sapiens OX=9606 GN=SLC44A2 PE=1 SV=3	SLC44A2	Q8IWA5	8.345	7	3	4	3	706	80.1	1638		3			2.87748e+06	104252	456680	154926		148818	1.90217e+06			887935	327682	160682	1.10783e+06		151073	310099		260828	959698	465977	179951	1.08684e+06	233345	681558	977475	275999	412315
	Other		Band 3 anion transport protein OS=Homo sapiens OX=9606 GN=SLC4A1 PE=1 SV=3	SLC4A1	P02730	32.655	7	5	9	5	911	101.7	4152		5				1.34864e+06					2.4157e+06		1.94363e+06		971391		1.55606e+06	1.89939e+06	516094	705633	6.78384e+06	176699	1.52151e+06		2.12271e+06	411570	419276	574238	470177		4.54665e+06
	Other		Sarcolemmal membrane-associated protein OS=Homo sapiens OX=9606 GN=SLMAP PE=1 SV=1	SLMAP	Q14BN4	9.007	4	3	4	3	828	95.1	1134		3			2.05425e+07	431585	641275	3.26839e+06		708134				38152.6	860294	3.44653e+06		2.5957e+06	1.2068e+06		2.88372e+06			1.93917e+06			574936	154483	360442	610238	1.30949e+06
	Other		Smoothelin OS=Homo sapiens OX=9606 GN=SMTN PE=1 SV=7	SMTN	P53814	96.301	19	16	72	16	917	99	35381	7.37	15	1	Met-loss+Acetyl [N-Term]	7.39683e+06	4.21908e+06	6.97575e+06	300682	2.09737e+06	4.07277e+07	3.99644e+06	6.89247e+06	8.21591e+06	3.15334e+06	1.24685e+06	2.11942e+07	910792	1.03941e+07	2.37292e+07	1.24378e+06	2.5609e+06	462976	1.34633e+07	1.21935e+07	3.20546e+06	3.65254e+06	4.29327e+06	894113	1.83101e+06	2.39485e+06	2.83968e+07
	Other		Synaptosomal-associated protein 23 OS=Homo sapiens OX=9606 GN=SNAP23 PE=1 SV=1	SNAP23	O00161	21.881	27	5	12	5	211	23.3	4559	6.14	3	2	Acetyl [N-Term]	4.92879e+06	1.6186e+06	864577		1.20177e+06	414704	3.8845e+06		661287	132740	910947	1.27914e+06	367019	331268	97263.6	3.92847e+06	403839	302899	723460	2.35257e+06	441933	554831		2.98157e+06	411981	196291	6.03611e+06
	Other		Sorbin and SH3 domain-containing protein 1 OS=Homo sapiens OX=9606 GN=SORBS1 PE=1 SV=3	SORBS1	Q9BX66	75.168	9	10	51	10	1292	142.4	24479		10			517704	914525	284735	526468	568114	2.44901e+07	3.79327e+06	621167	304634	358742	2.02505e+06	788060	1.49713e+06	4.45199e+06	7.06235e+06		629805	354276	1.82644e+06	291990	1.29452e+06	360157	295169	7.9563e+06	2.07312e+06	1.28965e+06	1.2642e+06
	Other		Sorbin and SH3 domain-containing protein 2 OS=Homo sapiens OX=9606 GN=SORBS2 PE=1 SV=3	SORBS2	O94875	16.804	5	4	4	4	1100	124	1611		4				977001	424895		259337	1.84211e+06	308561	202964	208303		642021			182993	376678		84172	571432		62040.3		902289		129637	77328.2	488048	338016
	Other		Sorbitol dehydrogenase OS=Homo sapiens OX=9606 GN=SORD PE=1 SV=4	SORD	Q00796	13.309	8	2	4	2	357	38.3	2159		2						105159	61410.3	3.98931e+06	984274	51366	306659	86463.7	34024		374077	820458					301415		305204		309709	777738
	Other		Signal peptidase complex subunit 3 OS=Homo sapiens OX=9606 GN=SPCS3 PE=1 SV=1	SPCS3	P61009	11.384	12	2	8	2	180	20.3	2331		2			428199	4.3072e+06	3.50959e+06	1.62475e+06	1.28312e+06	82276	2.40772e+06	220436	154735	1.46536e+06	3.04252e+06	1.29691e+06	431389	1.65857e+06	3.53537e+06	815569	906277	1.72389e+07	667253	743402	1.16046e+06		589217	1.81082e+06	340831	689493	215592
	Other		Spectrin beta chain, non-erythrocytic 1 OS=Homo sapiens OX=9606 GN=SPTBN1 PE=1 SV=2	SPTBN1	Q01082	15.889	2	4	12	4	2364	274.4	5295		4			2.05312e+06	777165	8.65791e+07	123421	1.07039e+06	8.62153e+06	772994	321406	785463	317948	1.68305e+06	2.40712e+06	1.1322e+06	9.42725e+06	1.53811e+06	103095	3.59656e+06	3.32585e+06	1.80046e+06	1.91687e+06	885284	3.33673e+06	2.82689e+06	1.05353e+06	1.19823e+06	154739	1.23199e+07
	Other		Sulfide:quinone oxidoreductase, mitochondrial OS=Homo sapiens OX=9606 GN=SQOR PE=1 SV=1	SQRDL; SQOR	Q9Y6N5	10.866	6	2	4	2	450	49.9	1245		2				3.04578e+06	823116		308289	246235			554066	944875			183560		286793	346634				230941		190165		538938		174760
	Other		Signal recognition particle 9 kDa protein OS=Homo sapiens OX=9606 GN=SRP9 PE=1 SV=2	SRP9; SRP9P1	P49458	19.923	45	4	7	4	86	10.1	3844		4			1.75832e+06	1.18384e+06	950590		1.51211e+06	56483.2	554298	402663	605474	1.4319e+06	685615	869534	434995	2.88508e+06	2.98059e+06	660826	669784	891050	3.62783e+06	2.7026e+06	1.00456e+06		1.23575e+06	8.19301e+06		591957	3.02507e+06
	Other		Serine/arginine-rich splicing factor 1 OS=Homo sapiens OX=9606 GN=SRSF1 PE=1 SV=2	SRSF1	Q07955	29.464	23	5	22	5	248	27.7	10823		5						447053						3.25234e+06	1.48261e+06	579986	1.00621e+06	6.03624e+06		561501	191748	873717			770297		195579	9.75117e+06	784375	3.02467e+06	1.0477e+06
	Other		Single-stranded DNA-binding protein, mitochondrial OS=Homo sapiens OX=9606 GN=SSBP1 PE=1 SV=1	SSBP1	Q04837	25.365	31	4	17	4	148	17.2	8826		4			169194	2.30031e+06	2.10384e+06		1.32152e+06	242893	1.58731e+06	756363	2.94132e+06	75227.4	3.00817e+06	492798	1.56867e+06	468203	370509	1.77529e+06	1.49937e+06	857417	2.10719e+06	1.82571e+06	389403	2.23357e+06	912838	1.7689e+06	959356	1.12416e+06	626800
	Other		Sarcospan OS=Homo sapiens OX=9606 GN=SSPN PE=2 SV=3	SSPN	Q14714	11.529	9	2	6	2	243	26.6	3032		2						1.19666e+06		51340.4	1.64048e+06			101349			773946	572966	1.53382e+06	785673	804608
	Other		Translocon-associated protein subunit delta OS=Homo sapiens OX=9606 GN=SSR4 PE=1 SV=1	SSR4	P51571	12.955	11	2	2	2	173	19	1204		2				135467	415986	40332.5	893221	2.16931e+06	467210		33981.7		53383.8				42851.2	210391			317091	297320	489447	258676	290700	362983	247986
	Other		Signal transducer and activator of transcription 1-alpha/beta OS=Homo sapiens OX=9606 GN=STAT1 PE=1 SV=2	STAT1	P42224	37.132	11	7	23	7	750	87.3	11829		7				418310	489298	325256	752405	2.92034e+06	413021	220480		1.01119e+06	1.37636e+06	1.33702e+06	591656	3.18735e+06	208749		1.3409e+06	665974	320986	3.28091e+06	1.55829e+06	4.86248e+06	1.04991e+07	2.04142e+07	149340	1.01112e+06	1.28783e+06
	Other		Signal transducer and activator of transcription 2 OS=Homo sapiens OX=9606 GN=STAT2 PE=1 SV=1	STAT2	P52630	18.892	7	4	7	4	851	97.9	3786		4			548171	286365					540958	56642.1	407042	887194			161521		90487.1	146127				788502	331741	178880	199051	5.13552e+06	222308		1.57886e+06
	Other		Signal transducer and activator of transcription 3 OS=Homo sapiens OX=9606 GN=STAT3 PE=1 SV=2	STAT3	P40763	6.898	2	2	3	2	770	88	1164		2			1.3391e+06	460950	3.16803e+06	1.914e+06	2.53263e+06	208764	2.03264e+06	1.2304e+06		46184.4	7.12497e+06			452649	1.02676e+06	1.86821e+06	1.4309e+06	1.18752e+06	1.27753e+06	2.58416e+06	3.11711e+06	2.41014e+06	3.39516e+06	1.99378e+06	1.44682e+06	883523	1.95867e+06
	Other		Serine/threonine-protein kinase 4 OS=Homo sapiens OX=9606 GN=STK4 PE=1 SV=2	STK4	Q13043	17.32	6	2	3	2	487	55.6	1055		2						66608.2			99376.4								1.48622e+06	1.09799e+06				581481				1.77609e+06
	Other		Erythrocyte band 7 integral membrane protein OS=Homo sapiens OX=9606 GN=STOM PE=1 SV=3	STOM	P27105	227.438	58	16	579	16	288	31.7	305289	1.71	16	1		5.16167e+08	4.86354e+08	1.52361e+08	4.0724e+07	4.70409e+07	1.13896e+08	3.56913e+07	3.77129e+08	6.53566e+08	6.79859e+07	6.32235e+07	3.96297e+07	3.73069e+07	4.93355e+07	7.4991e+07	6.08308e+07	2.72239e+07	5.60774e+07	5.73816e+07	4.91276e+07	2.16605e+07	5.22363e+07	4.79989e+07	6.43562e+07	3.90504e+07	8.43774e+07	8.89125e+07
	Other		Dolichyl-diphosphooligosaccharide--protein glycosyltransferase subunit STT3A OS=Homo sapiens OX=9606 GN=STT3A PE=1 SV=2	STT3A	P46977	66.102	11	9	56	8	705	80.5	28986	2.09	9	1		4.1351e+06	4.16113e+06	6.04668e+06	1.57225e+06	2.12374e+06	1.40717e+07	6.15719e+06	8.56066e+06	1.26178e+07	2.64143e+06	6.26976e+06	1.92524e+06	3.18316e+06	4.28919e+06	1.79273e+06	4.63312e+06	3.31738e+06	3.25968e+06	2.55021e+06	4.26956e+06	3.31554e+06	7.78505e+06	1.23112e+07	6.9708e+06	2.91965e+06	9.93939e+06	2.14765e+07
	Other		Syntaxin-4 OS=Homo sapiens OX=9606 GN=STX4 PE=1 SV=2	STX4	Q8TCJ2	11.223	2	2	12	1	826	93.6	7382		2						157937	343250	245958	1.87903e+06	1.18078e+06	2.44897e+06	2.09713e+06					602820	1.25278e+06	951598	2.12598e+06	658178	1.99674e+06		1.51908e+06	884759	421177	808457	2.97465e+06	2.36611e+06
	Other		Transcription elongation factor SPT5 OS=Homo sapiens OX=9606 GN=SUPT5H PE=1 SV=1	SUPT5H	O00267	5.027	2	2	5	2	1087	120.9	1828		2			239904									1.73254e+07	138482		298519			112276	197532						733347	1.05596e+06	1.4328e+06		935593
	Other		Surfeit locus protein 4 OS=Homo sapiens OX=9606 GN=SURF4 PE=1 SV=3	SURF4	O15260	45.147	15	6	49	6	269	30.4	24530	2.34	5	1	Met-loss+Acetyl [N-Term]	798706	1.31357e+06	764457	122148	1.80754e+06	3.00575e+06	4.7238e+06	440987	3.19172e+06	4.23046e+06	1.99108e+06	2.4155e+06	2.08924e+06	6.72474e+06	137761	4.30361e+06	912282	3.3139e+06	5.42531e+06	3.53021e+06	3.67734e+06	1.02042e+07	4.71823e+06	6.81421e+06	2.67456e+06	4.38834e+06	1.46099e+06
	Other		Sushi domain-containing protein 2 OS=Homo sapiens OX=9606 GN=SUSD2 PE=1 SV=1	SUSD2	Q9UGT4	57.491	16	6	21	6	822	90.2	6153	12.73	5	2		7.14936e+06	4.82266e+06	9.24205e+06	2.49194e+07	9.01292e+06	783258	477263	807209	89147	2.53551e+06	3.92037e+06	2.06314e+07	5.39254e+06	8.66541e+06	962098	1.54254e+06	849451	293038	1.2568e+07	1.6032e+07	3.5686e+07	1.04326e+07	1.20142e+07	5.61279e+06	602639	250429	2.43904e+06
	Other		Synaptogyrin-2 OS=Homo sapiens OX=9606 GN=SYNGR2 PE=1 SV=1	SYNGR2	O43760	17.563	13	3	40	3	224	24.8	17293		3			2.77049e+06	2.24287e+06	2.26285e+06	1.88482e+06	3.58863e+06	386388	3.19603e+06	2.50213e+06	1.44958e+06	4.81982e+06	3.24671e+06	4.48565e+06	5.50124e+06	1.0895e+07	306830	1.02913e+06	5.72739e+06	3.20946e+06	5.09084e+06	5.90897e+06	4.43019e+06	9.04611e+06	2.61111e+06	2.17685e+06	1.12379e+06	1.053e+07	9.68568e+06
	Other		Synemin OS=Homo sapiens OX=9606 GN=SYNM PE=1 SV=2	SYNM	O15061	301.766	28	38	191	38	1565	172.7	99251		38			1.09168e+07	4.27807e+07	4.73051e+07	9.51755e+07	4.37248e+07	3.60936e+08	1.47218e+07	7.28914e+06	1.03392e+07	2.11165e+07	1.38868e+07	6.46609e+07	6.80128e+06	1.00409e+08	7.09884e+07	4.99965e+06	1.05796e+07	7.34701e+06	1.18981e+07	6.57817e+07	4.79092e+07	3.07391e+07	5.37444e+07	1.05616e+07	8.42618e+06	5.47092e+06	1.6443e+07
	Other		Synaptopodin-2 OS=Homo sapiens OX=9606 GN=SYNPO2 PE=1 SV=2	SYNPO2	Q9UMS6	52.397	9	7	19	7	1093	117.4	9630		7			2.01519e+06	1.23411e+06	2.04721e+06	669188		4.02026e+06	1.48029e+06		92106.5	206339	1.60276e+06	219084	1.07621e+06	1.52984e+06	2.06421e+06		1.09832e+06					334114	980639
	Other		Synaptophysin-like protein 1 OS=Homo sapiens OX=9606 GN=SYPL1 PE=1 SV=1	SYPL1	Q16563	44.49	22	6	102	6	259	28.5	57722	2.95	6	1		6.27906e+06	1.12471e+07	8.14161e+06	5.44587e+06	1.18715e+07	7.64839e+06	1.12684e+07	5.2665e+06	1.8313e+07	3.16958e+06	6.07426e+06	4.55213e+06	7.96478e+06	1.47516e+07	7.87492e+06	2.49527e+06	2.57768e+06	1.08324e+07	1.42395e+07	1.52527e+07	7.16098e+06	1.55289e+07	7.99235e+06	8.8946e+06	1.23371e+07	7.37071e+06	2.1863e+07
	Other		Transgelin OS=Homo sapiens OX=9606 GN=TAGLN PE=1 SV=4	TAGLN	Q01995	237.502	68	25	381	25	201	22.6	169841		25			9.86018e+07	1.81188e+07	3.90498e+07	1.36425e+07	9.40527e+06	3.43068e+08	8.00601e+07	5.91269e+06	2.16227e+07	6.23436e+07	1.65291e+08	1.4748e+07	3.75529e+07	9.67059e+07	2.23643e+08	4.66108e+07	4.77934e+07	9.46475e+07	1.84026e+07	7.94851e+06	6.92697e+06	8.2314e+06	2.71777e+07	3.32439e+07	1.34212e+07	1.04693e+07	5.73454e+06
	Other		Transgelin-2 OS=Homo sapiens OX=9606 GN=TAGLN2 PE=1 SV=3	TAGLN2	P37802	23.139	15	3	7	3	199	22.4	3238		3				165088	57872.8			49025.1	207552	51686.3	67037.5	67069.4	422889		33694.5		73759.7	743197	231868	320700				78109.9		1.09153e+06	59998.5	353990	196182
	Other		Antigen peptide transporter 2 OS=Homo sapiens OX=9606 GN=TAP2 PE=1 SV=1	TAP2	Q03519	12.233	3	2	6	2	686	75.6	2914		2			4.5238e+06			1.30924e+07	6.46161e+06	1845782	1.2618e+07	1.75885e+07	3.45846e+06	69445.1	9.09069e+06	259742	1.81513e+07	1.00852e+07	1.60344e+07	2.33725e+07	1.75558e+07	1.32059e+07	5.10857e+06	2.69601e+06	2.48759e+06	3.02826e+06	3.19554e+06	3.71392e+06	460484	1.69479e+06	1.16857e+06
	Other		Very-long-chain enoyl-CoA reductase OS=Homo sapiens OX=9606 GN=TECR PE=1 SV=1	TECR	Q9NZ01	21.193	13	5	17	5	308	36	8290		5			6.52885e+06	1.03364e+07	342159	1.81718e+07	1.89047e+07	2.46368e+06	1.4168e+06	8.74689e+06	2.63041e+06	1.62746e+06	2.55585e+07	5.09137e+07	2.36776e+07	2.32355e+07	5.162e+06	9.56996e+06	9.16991e+06	5.16019e+06	3.62533e+07	2.70759e+07	3.00246e+07	1.77265e+07	2.57788e+07	5.97349e+06	5.0255e+06	4.23405e+06	6.73895e+06
	Other		Testin OS=Homo sapiens OX=9606 GN=TES PE=1 SV=1	TES	Q9UGI8	9.858	6	2	3	2	421	48	1355		2				113576		111010	1.61252e+06	804098	1.43523e+06		322828											204153					780804	336480	554649
	Other		Serotransferrin OS=Homo sapiens OX=9606 GN=TF PE=1 SV=3	TF	P02787	20.515	5	3	32	2	698	77	15730		3			611173	1.3513e+06	2.09133e+06	363689	2.16827e+06	120605	4.94845e+06	1.50947e+06	646886	34635.7	317912	761631	982215	985094	698774	1.50293e+06	2.46891e+06	740171	183749	1.85897e+06	819320	517777	474223	2.80695e+06		715016
	Other		Trefoil factor 1 OS=Homo sapiens OX=9606 GN=TFF1 PE=1 SV=1	TFF1	P04155	29.459	46	4	15	4	84	9.1	7102	2.93	3	1		220939				389195		2.40735e+07	1.22035e+06		350893			514553	1.49271e+07	205224	4.27352e+06		5.15839e+06	253754	2.24694e+06	4.68576e+06		437125	987041	1.30129e+06	7.90567e+06	1.93445e+06
	Other		Trefoil factor 2 OS=Homo sapiens OX=9606 GN=TFF2 PE=1 SV=2	TFF2	Q03403	41.885	23	3	102	3	129	14.3	47899	11.85	2	3		1.69466e+06	3.34721e+06	1.04526e+06	5.75856e+06	3.96825e+06	101091	8.25512e+07	3.08474e+07	2.32913e+06	3.25077e+07	3.18475e+06	587307	4.91514e+07	4.49372e+07		1.36865e+08	3.71027e+06	2.80629e+06	1.85881e+07	3.92724e+06	4.37799e+07		1.03069e+06	203159	233086	507653	493536
	Other		Protein TFG OS=Homo sapiens OX=9606 GN=TFG PE=1 SV=2	TFG	Q92734	12.883	9	3	8	3	400	43.4	4350		3			409661					1.05115e+06	2.07304e+06		918097	206871	2.67277e+06		1.28017e+06	1.12945e+06	9.02964e+06	1.53733e+06	1.73163e+06	4.57044e+06	1.20131e+06		578453	2.7299e+06	3.46158e+06	2.6787e+06		2.06019e+06	703314
	Other		Transferrin receptor protein 1 OS=Homo sapiens OX=9606 GN=TFRC PE=1 SV=2	TFRC	P02786	16.201	5	3	4	3	760	84.8	1711		3				1.07907e+06	1.35e+06	969197	650888	36201.2	806315	928300		60808.3		2.30427e+06	750894	934889		966423	715465	3.05474e+06	269116	697864				2.47262e+06	7.00916e+06		4.96004e+06
	Other		Transforming growth factor beta-1-induced transcript 1 protein OS=Homo sapiens OX=9606 GN=TGFB1I1 PE=1 SV=2	TGFB1I1	O43294	71.368	21	9	44	9	461	49.8	21041		9				321016	278056	1.48268e+06	2.03012e+06	1.7013e+07	4.64294e+06	203647	410299	9.91527e+06	513864	2.16357e+06	2.76619e+06	8.3516e+06	1.73523e+07	2.6476e+06	1.79343e+06	825779	788325		1.24206e+06	504009	2.99318e+06	3.57373e+06	760025	770540	315211
	Other		Protein THEM6 OS=Homo sapiens OX=9606 GN=THEM6 PE=1 SV=2	THEM6	Q8WUY1	9.692	12	3	5	3	208	23.9	2603		3								120774	1.06224e+06			2.08224e+06		179650	165251	792617			74943.2	118954		1.96969e+06		667901	624305	686760	451399		1.30645e+06
	Other		Thy-1 membrane glycoprotein OS=Homo sapiens OX=9606 GN=THY1 PE=1 SV=2	THY1	P04216	20.67	15	2	32	2	161	17.9	15537		2			951216	1.00585e+06	1.76671e+06	980703	5.23564e+06	1.61414e+06	7.16793e+06		133866	3.83067e+06	2.32083e+06	6.98254e+06	681141	7.4541e+06	1.36245e+06	2.83521e+06		1.20099e+06	2.42958e+06	7.82157e+06	2.23806e+06	4.7164e+06	5.1801e+06	2.04261e+07		2.9139e+06	5.20828e+06
	Other		Nucleolysin TIA-1 isoform p40 OS=Homo sapiens OX=9606 GN=TIA1 PE=1 SV=3	TIA1	P31483	12.692	7	2	2	2	386	42.9	1167		2				981085	2.51711e+06			16186.7	196357	976706	441890		1.34318e+07			2.15224e+06					554338	428726	1.94636e+06			1.81223e+06			762950
	Other		Talin-1 OS=Homo sapiens OX=9606 GN=TLN1 PE=1 SV=3	TLN1	Q9Y490	482.61	29	53	241	46	2541	269.6	113738		53			3.5088e+07	1.8005e+07	2.62545e+07	2.57033e+07	1.39769e+07	1.13821e+08	4.61404e+07	3.07949e+07	1.75677e+07	3.6235e+07	2.45279e+07	2.06111e+07	4.50816e+07	6.16973e+07	6.88734e+07	1.95644e+07	2.08966e+07	2.52475e+07	3.30744e+07	2.63942e+07	1.56772e+07	2.55674e+07	1.88718e+07	2.44517e+07	1.00431e+07	1.63724e+07	2.33019e+07
	Other		Transmembrane 9 superfamily member 2 OS=Homo sapiens OX=9606 GN=TM9SF2 PE=1 SV=1	TM9SF2	Q99805	35.174	8	4	13	4	663	75.7	5702		4			250746		408240	779365	649483	19820.4	9.53071e+06	843169	797576	1.00182e+06	1.23334e+06	274589	1.09628e+06	3.12484e+06	2.50716e+06	8.56324e+06	1.06019e+06	2.02365e+06	1.89737e+06	4.32492e+06	1.90771e+06	605198	99348.6	7.5951e+06	3.10915e+06		5.82524e+06
	Other		Transmembrane 9 superfamily member 3 OS=Homo sapiens OX=9606 GN=TM9SF3 PE=1 SV=2	TM9SF3	Q9HD45	17.065	5	3	18	3	589	67.8	7336		3			854597	916433	5.91108e+06	1.10423e+06	1.74289e+06	28326.6	4.54851e+06	3.19039e+06	941374	4.20276e+06	2.98768e+06	2.31976e+06	1.16377e+07	8.02212e+06	1.18061e+06	1.46139e+07	4.66975e+06	5.1278e+06	2.36969e+06	5.18118e+06	4.02822e+06	5.15401e+06	3.57146e+06	9.36241e+06	1.13726e+06	805022	4.19221e+06
	Other		Transmembrane 9 superfamily member 4 OS=Homo sapiens OX=9606 GN=TM9SF4 PE=1 SV=2	TM9SF4	Q92544	12.425	5	2	6	2	642	74.5	2653		2				778557			555439	43801.5	313747	1.29264e+06		350684	1.47562e+06	578645	2.99896e+06	363455			186668	966130	1.37562e+06	956296	647494					396797
	Other		Protein lifeguard 3 OS=Homo sapiens OX=9606 GN=TMBIM1 PE=1 SV=2	TMBIM1	Q969X1	18.597	5	3	5	3	311	34.6	2154		3			1.64585e+06					40668	343749	995094	1.60716e+06	743117					305682	219073	504678	1.33544e+06		587113					413962	1.71104e+06	3.22242e+06
	Other		Transmembrane emp24 domain-containing protein 4 OS=Homo sapiens OX=9606 GN=TMED4 PE=1 SV=1	TMED4	Q7Z7H5	5.489	9	2	2	2	227	25.9	604		2				275672	106497	125002		814164				1.10987e+06	146853	1.69818e+06	101116	9.62798e+06			199474		1.19778e+07	149955	6.03442e+06
	Other		Transmembrane emp24 domain-containing protein 7 OS=Homo sapiens OX=9606 GN=TMED7 PE=1 SV=2	TMED7; TMED7-TICAM2	Q9Y3B3	5.929	11	2	2	2	224	25.2	558		2				157889					429395																188462
	Other		Transmembrane protein 147 OS=Homo sapiens OX=9606 GN=TMEM147 PE=1 SV=1	TMEM147	Q9BVK8	8.71	7	2	4	2	224	25.2	1702		2								45357	360490	935908	159064			406395	17116.2						59799		210451	104327	130454	23961.5
	Other		Transmembrane protein 14C OS=Homo sapiens OX=9606 GN=TMEM14C PE=1 SV=1	TMEM14C	Q9P0S9	24.611	41	2	8	2	112	11.6	5021		2				69778.4			246997		444826	218824	2.521e+06	558864					100903	1.42659e+06		711923	12792.5	288208		151608		507258	483147	858842	582599
	Other		Transmembrane protein 205 OS=Homo sapiens OX=9606 GN=TMEM205 PE=1 SV=1	TMEM205	Q6UW68	10.422	15	2	5	2	189	21.2	1496		2				1.13924e+07	2.31214e+07	9.15034e+06	1.91071e+07	48918	8.87947e+06	8.01554e+06	3.89224e+07			4.52612e+06	708163	751004	533287	5.76589e+06	1.08656e+07	5.85571e+06	1.0251e+06	4.31706e+06	4.60364e+06	458160	1.24777e+06	3.16138e+06	2.9801e+06	3.6126e+06	1.73737e+06
	Other		Transmembrane protein 33 OS=Homo sapiens OX=9606 GN=TMEM33 PE=1 SV=2	TMEM33	P57088	18.001	13	3	11	3	247	28	5139		3				696693			1.57857e+06		1.82642e+06	656860	1.09993e+06		680375	5.51646e+06	3.52739e+06	5.02877e+06	147450	2.34078e+06	3.79343e+06	1.11635e+06	2.99407e+06	4.40664e+06	1.43977e+06	9.69064e+06	2.33608e+06	3.85409e+06	2.10232e+06	4.3374e+06	6.08889e+06
	Other		Transmembrane protein 43 OS=Homo sapiens OX=9606 GN=TMEM43 PE=1 SV=1	TMEM43	Q9BTV4	66.223	25	8	24	8	400	44.8	11813		8			452677	287184	1.75785e+06	1.57761e+06	1.07223e+06	6.69986e+06	5.53042e+06	1.11396e+06	384387	4.23915e+07	3.4751e+06	1.38036e+06	1.39549e+06	1.83817e+06	5.06577e+06	4.88218e+06	1.51032e+06	680256	598299	1.99138e+06	2.10788e+06	2.50646e+06	3.39029e+06	8.89191e+06	515231	1.43824e+06	642616
	Other		Transmembrane protein 50A OS=Homo sapiens OX=9606 GN=TMEM50A PE=1 SV=1	TMEM50A	O95807	6.198	12	2	2	2	157	17.4	371	2.04	1	1	Met-loss+Acetyl [N-Term]									228187									559573							498211		1.90736e+06
	Other		Tumor necrosis factor alpha-induced protein 2 OS=Homo sapiens OX=9606 GN=TNFAIP2 PE=1 SV=2	TNFAIP2	Q03169	5.058	3	2	2	2	654	72.6	494		2			144572			438936	718416	244214	209364	267327	426721		410308			258932			286168						196201	251937
	Other		Tensin-1 OS=Homo sapiens OX=9606 GN=TNS1 PE=1 SV=2	TNS1	Q9HBL0	98.319	12	17	76	16	1735	185.6	30837		17			535950	2.7563e+06	2.13823e+06	714951	1.61828e+06	3.77836e+07	1.03319e+07	215897	1.38231e+06	4.50058e+06	6.37353e+06	2.02207e+06	3.60895e+06	1.04152e+07	3.09495e+07	4.53815e+06	6.15323e+06	1.48033e+06	3.0707e+06	1.73056e+06	751826	1.06107e+06	3.6896e+06	6.58266e+06	2.7175e+06	1.40832e+06	3.18989e+06
	Other		Mitochondrial import receptor subunit TOM40 homolog OS=Homo sapiens OX=9606 GN=TOMM40 PE=1 SV=1	TOMM40	O96008	44.797	29	6	22	6	361	37.9	9142	2.3	5	1		8.007e+07	2.14415e+06	1.35616e+06	380428	2.87678e+06	1.9392e+06	6.13017e+06		1.20811e+06	3.06028e+06	1.27876e+06	668250		1.007e+06	2.49638e+06	5.47617e+06	817147		4.21127e+06	4.417e+06	536690	2.31228e+06	560734	1.15114e+07	628725	3.85086e+06	1.27662e+07
	Other		Tropomyosin alpha-1 chain OS=Homo sapiens OX=9606 GN=TPM1 PE=1 SV=2	TPM1	P09493	131.534	46	21	185	7	284	32.7	84255		21			2.39978e+07	3.78359e+06	4.94779e+06	1.49936e+07	1.47334e+07	6.2281e+07	7.58399e+06	5.80525e+06	7.77364e+07	1.40941e+07	1.74188e+07	1.06417e+07	1.59316e+07	2.17627e+07	8.70998e+07	6.83264e+06	3.39268e+07	1.68848e+07	2.04612e+07	1.02481e+07	6.94569e+06	7.36892e+06	4.44359e+07	1.59e+07	3.15987e+07	1.31053e+07	1.28601e+07
	Other		Tropomyosin beta chain OS=Homo sapiens OX=9606 GN=TPM2 PE=1 SV=1	TPM2	P07951	134.928	35	18	153	4	284	32.8	76143		18			1.43515e+06	1.00503e+07	1.24405e+07	5.12648e+06	9.65764e+06	1.35622e+07	3.53168e+06	1.53712e+06	2.0541e+06	766973	8.51752e+06	4.93493e+06	1.12673e+07	9.08387e+06	2.44075e+07	2.28019e+06	8.18439e+06	3.86836e+06	6.49718e+06	1.12005e+07	2.63492e+06	4.61437e+06	2.08366e+07	3.15468e+06	741580	1.68338e+06	3.49592e+06
	Other		Tropomyosin alpha-4 chain OS=Homo sapiens OX=9606 GN=TPM4 PE=1 SV=3	TPM4	P67936	41.497	29	10	97	2	248	28.5	41787	21.12	9	1	Met-loss+Acetyl [N-Term]	1.14691e+06	379477		1.15744e+06	1.91239e+06	478522	298694			103895	378298	1.33719e+06	859049	880765	335862		643170		2.34106e+06	703800	318639	4.92917e+06	1.57016e+06	2.73162e+06	320361	1.08663e+06
	Other		Tryptase alpha/beta-1 OS=Homo sapiens OX=9606 GN=TPSAB1 PE=1 SV=1	TPSAB1; TPSB2	Q15661	103.068	33	11	213	10	275	30.5	91654		11			6.13146e+07	3.03674e+07	1.09872e+07	4.24439e+07	1.88365e+07	2.64632e+07	4.61031e+07	2.69659e+07	4.63649e+07	4.82584e+07	3.39129e+07	1.03298e+07	2.71938e+07	3.65905e+07	5.21619e+07	3.525e+07	3.47106e+07	4.60629e+07	2.3125e+07	3.96014e+07	3.95627e+08	9.17819e+06	1.48244e+07	1.48756e+07	1.54114e+07	9.40779e+06	2.27352e+07
	Other		E3 ubiquitin/ISG15 ligase TRIM25 OS=Homo sapiens OX=9606 GN=TRIM25 PE=1 SV=2	TRIM25	Q14258	15.556	6	3	3	3	630	70.9	1582		3																147111					127084	199497				3.35273e+06
	Other		60 kDa SS-A/Ro ribonucleoprotein OS=Homo sapiens OX=9606 GN=RO60 PE=1 SV=2	TROVE2	P10155	35.885	13	6	10	6	538	60.6	4793		6											260203	44326.5	269557	3.08435e+06	785675				178374	378362	1.45256e+06	2.81686e+07	1.72973e+06	1.25792e+06	822784	899455	1.72246e+06		5.88802e+06
	Other		Transient receptor potential cation channel subfamily V member 2 OS=Homo sapiens OX=9606 GN=TRPV2 PE=1 SV=1	TRPV2	Q9Y5S1	7.122	3	2	4	2	764	85.9	1258		2									1.35985e+06				212076		4.64476e+06		147228	1.54339e+06	3.97933e+06							2.12154e+06	225814	322685
	Other		Elongation factor Ts, mitochondrial OS=Homo sapiens OX=9606 GN=TSFM PE=1 SV=2	TSFM	P43897	9.716	10	3	3	3	325	35.4	1076		3			259473			269679				501868		100499	359499	440706	169909	123222				992630	1.09753e+06	1.3276e+06	1.86584e+06	1.60308e+06	1.03782e+06	2.03923e+06	954270		1.06797e+06
	Other		Tetraspanin-8 OS=Homo sapiens OX=9606 GN=TSPAN8 PE=1 SV=1	TSPAN8	P19075	21.101	14	3	22	3	237	26	12777		3			683201	330264	87538.7	1.45257e+06	1.4979e+06	432936	8.41416e+06		150103	525314	162667	6.97687e+06	104594	5.52784e+06	71585.6	1.27835e+07	2.38035e+06	1.19616e+06	5.15388e+06	8.37102e+06	3.051e+06	1.78478e+06	52120.8	2.86537e+06	1.27607e+06	248318	1.56491e+06
	Other		Translocator protein OS=Homo sapiens OX=9606 GN=TSPO PE=1 SV=3	TSPO	P30536	40.664	27	5	57	5	169	18.8	37037		5			4.9526e+06	2.49458e+06	888323	7.80832e+06	5.2801e+06	9.79855e+06	1.38985e+07	1.9637e+06	693251	3.36217e+07	4.1328e+06	2.72322e+07	1.22885e+07	2.51737e+07	1.34192e+07	1.43271e+07	1.14313e+07	2.50734e+06	1.73453e+07	1.2341e+07	8.6155e+06	1.66869e+07	7.66974e+06	3.14304e+07	2.83039e+06	6.91118e+06	8.39896e+06
	Other		Transthyretin OS=Homo sapiens OX=9606 GN=TTR PE=1 SV=1	TTR	P02766	89.844	37	7	35	7	147	15.9	12561		7			2.93155e+07	1.04346e+06	1.52644e+06	7.86952e+06	1.36254e+06	154741	4.05947e+06	2.11107e+06		6.4977e+06	2.29667e+06	2.92716e+06	6.71661e+06	1.94203e+06	2.88453e+06	1.93956e+06	1.25463e+06	2.60777e+06	2.50037e+06	2.6197e+06	2.38498e+06	2.71776e+06	3.59982e+06	5.08359e+06	1.56988e+06	537927	184161
	Other		Tubulin alpha-1A chain OS=Homo sapiens OX=9606 GN=TUBA1A PE=1 SV=1	TUBA1A	Q71U36	445.485	69	46	781	3	451	50.1	392897		46			1.82993e+07	1.74014e+07	2.33359e+07	3.78866e+07	3.26181e+07	2.99577e+08	1.40848e+08	1.74736e+07	3.33269e+07	7.78419e+07	5.3166e+07	4.65528e+07	7.61345e+07	8.57399e+07	1.36375e+08	8.41215e+07	8.84414e+07	4.37594e+07	7.26597e+07	8.27115e+07	3.28489e+07	5.92994e+07	7.39685e+07	4.69227e+08	3.42689e+07	4.12903e+07	1.19086e+08
	Other		Tubulin alpha-1C chain OS=Homo sapiens OX=9606 GN=TUBA1C PE=1 SV=1	TUBA1C	Q9BQE3	394.341	65	42	732	4	449	49.9	376858		42				680200		1.04622e+06	207382	2.45397e+07	2.12243e+07	41074.4	1.83619e+06	727689	4439.47	742597	3.23378e+06	1.40044e+06	6.52376e+06	1.89585e+07			1.76512e+06	2.30778e+06	508242	844621	4.9678e+06	5.43875e+07	3.21202e+06	359238	519533
	Other		Tubulin alpha-4A chain OS=Homo sapiens OX=9606 GN=TUBA4A PE=1 SV=1	TUBA4A	P68366	376.88	57	39	563	3	448	49.9	276422		39				173666		617975	105991	8.21112e+06	2.60887e+06	726661	837977	3.50897e+06	2.47728e+06		2.4974e+06	3.09142e+06	6.54153e+06	2.165e+06	3.13648e+06	837040	3.01222e+06	1.0899e+06	560395	1.10333e+06	995267	9.05728e+06	5.06387e+06	866825	2.34996e+06
	Other		Tubulin beta chain OS=Homo sapiens OX=9606 GN=TUBB PE=1 SV=2	TUBB	P07437	349.717	55	40	557	3	444	49.6	266584		40			2.81566e+07	3.53174e+07	4.9857e+07	2.62219e+07	1.65837e+07	3.02309e+08	1.26917e+08	1.09485e+07	3.22423e+07	2.93645e+07	4.75633e+07	1.05548e+07	3.24484e+07	4.27694e+07	1.23659e+08	6.15822e+07	6.16604e+07	1.44632e+07	5.49018e+07	6.42946e+07	2.24782e+07	3.94225e+07	5.67419e+07	4.91431e+08	2.07474e+08	1.57016e+07	4.07467e+07
	Other		Tubulin beta-4B chain OS=Homo sapiens OX=9606 GN=TUBB4B PE=1 SV=1	TUBB4B	P68371	285.422	52	36	507	3	445	49.8	245345		36			3.89425e+06	471336	316010	2.72814e+06	2.24932e+07	2.38409e+07	4.39376e+06	3.56629e+06		498564	1.0673e+06	2.9417e+07	137743	1.11515e+06	6.81418e+06		502650	462138				547600		1.34128e+07	116822	1.37718e+06
	Other		Tubulin beta-6 chain OS=Homo sapiens OX=9606 GN=TUBB6 PE=1 SV=1	TUBB6	Q9BUF5	146.879	34	24	243	3	446	49.8	117574		24			2.47404e+06	251739	301374	505813	320865	1.07957e+06	6.76589e+06	5.31749e+07	486519	403951			302514	1.06273e+06	1.19146e+06	285135	355907	387835	720527	386419	376248			3.28965e+06		3.55253e+06	801795
	Other		Elongation factor Tu, mitochondrial OS=Homo sapiens OX=9606 GN=TUFM PE=1 SV=2	TUFM	P49411	106.02	35	15	145	15	452	49.5	73541		15			6.65563e+06	1.57067e+07	8.39684e+06	6.67484e+06	1.61899e+07	1.29331e+07	7.70473e+07	5.80465e+06	1.87747e+07	1.09874e+07	5.93557e+06	1.57405e+07	1.01417e+07	2.64873e+07	1.61713e+07	4.47325e+07	3.27026e+07	7.52096e+06	5.21145e+07	1.51859e+07	1.14055e+07	1.78126e+07	1.28204e+07	4.56154e+07	6.5824e+06	6.70625e+06	2.60473e+07
	Other		Thioredoxin OS=Homo sapiens OX=9606 GN=TXN PE=1 SV=3	TXN	P10599	21.535	36	4	10	4	105	11.7	4299		4			2.14545e+06	9.50958e+06	1.51951e+07		8.88113e+06	570674	1.51493e+06	2.97462e+06	718932	1.01214e+06	3.448e+06	394179	801028	290953	784337	308239	1.8136e+06	1.29687e+06	638869	2.56184e+06	294847	821799	4.6687e+06	606371	401717
	Other		Thioredoxin domain-containing protein 5 OS=Homo sapiens OX=9606 GN=TXNDC5 PE=1 SV=2	TXNDC5	Q8NBS9	17.074	6	2	4	2	432	47.6	2369		2				483773		1.85408e+06	429060	84678.6	1.14331e+06		973490	36910.3		746580		524248	195053	162141	422465		920414		76217.5		341538	2.1975e+06	476598
	Other		Ubiquitin-60S ribosomal protein L40 OS=Homo sapiens OX=9606 GN=UBA52 PE=1 SV=2	UBA52	P62987	29.512	27	4	94	4	128	14.7	43596		4			1.04878e+07	4.35161e+06	4.09355e+06	4.56217e+06	8.745e+06	4.32384e+06	3.43344e+06	2.08044e+06	6.22583e+06	7.47181e+06	1.02741e+07	7.85458e+06	8.24879e+06	9.69296e+06	1.12446e+06	2.22901e+06	1.10228e+07	7.72265e+06	7.21119e+06	1.62715e+07	8.40681e+06	1.15449e+07	8.37015e+06	7.60601e+06	6.51538e+06	8.0975e+06	9.40618e+06
	Other		Ubiquitin-conjugating enzyme E2 D3 OS=Homo sapiens OX=9606 GN=UBE2D3 PE=1 SV=1	UBE2D3	P61077	22.312	24	2	6	2	147	16.7	4070		2				138638					1.59945e+06	283189	552187	136814		540947			1.27263e+06	559978	149522	101462		340893		65038	327083	2.50062e+06		599414	105925
	Other		Cytochrome b-c1 complex subunit 1, mitochondrial OS=Homo sapiens OX=9606 GN=UQCRC1 PE=1 SV=3	UQCRC1	P31930	13.952	7	3	41	3	480	52.6	16963		3			2.55443e+06	2.24943e+06	7.93485e+06	8.18873e+06	9.22453e+06	1.46162e+06	5.25553e+06	4.4929e+06	2.62229e+06	1.40917e+06	5.79909e+06	8.69358e+06	6.9102e+06	6.82217e+06	1.45565e+06	2.5112e+06	7.296e+06	5.63412e+06	630173	3.17432e+06	3.18688e+06	5.33238e+06	1.25058e+07	2.43958e+06	2.47343e+06	506462	486500
	Other		Putative cytochrome b-c1 complex subunit Rieske-like protein 1 OS=Homo sapiens OX=9606 GN=UQCRFS1P1 PE=5 SV=1	UQCRFS1P1	P0C7P4	12.384	7	2	2	2	283	30.8	799		2							247096	504348	523851	725419		80690					15622.9						215868			262453	43491.7
	Other		ATP synthase membrane subunit DAPIT, mitochondrial OS=Homo sapiens OX=9606 GN=ATP5MD PE=1 SV=1	USMG5	Q96IX5	17.018	43	2	12	2	58	6.5	5462		2			5.01505e+06	463473	6.00749e+06	1.79741e+06	4.28968e+06	307364	4.32663e+06	280927	1.36503e+07	1.17174e+06	4.36962e+06	2.83223e+06	3.7795e+06	1.49726e+06	2.19275e+06	3.03465e+06	2.52299e+06	1.06159e+07	807062	4.0889e+06	2.30364e+06	693898	8.14322e+06	4.50856e+06	2.58338e+06	2.67257e+06	3.50536e+06
	Other		Probable ubiquitin carboxyl-terminal hydrolase FAF-X OS=Homo sapiens OX=9606 GN=USP9X PE=1 SV=3	USP9X	Q93008	8.614	1	2	3	2	2570	292.1	1427		2							1.31167e+06	82791.2		1.12922e+06						581889	686122		1.80206e+06		163006	264475				1.19307e+06		2.19313e+06	916338
	Other		Valine--tRNA ligase OS=Homo sapiens OX=9606 GN=VARS1 PE=1 SV=4	VARS; VARS2	P26640	6.487	1	2	2	2	1264	140.4	791		2
	Other		Vinculin OS=Homo sapiens OX=9606 GN=VCL PE=1 SV=4	VCL	P18206	189.344	25	25	135	25	1134	123.7	58168		25			8.33893e+06	1.5885e+06	2.99347e+06	8.79892e+06	1.17676e+06	5.0215e+07	2.11745e+07	3.83739e+06	4.15219e+06	1.19228e+07	1.90367e+07	8.08713e+06	1.48653e+07	4.92105e+07	2.42094e+07	2.26812e+07	8.66001e+06	8.28023e+06	6.78095e+06	7.75553e+06	1.96351e+06	1.46801e+07	1.09811e+08	6.39427e+06	1.16898e+07	2.96583e+07	4.79093e+07
	Other		Transitional endoplasmic reticulum ATPase OS=Homo sapiens OX=9606 GN=VCP PE=1 SV=4	VCP	P55072	6.819	4	2	2	2	806	89.3	751		2						103174		122211			86845		54193.1			358014		200288		66890.4					224090	284432
	Other		Voltage-dependent anion-selective channel protein 1 OS=Homo sapiens OX=9606 GN=VDAC1 PE=1 SV=2	VDAC1	P21796	285.047	77	27	477	25	283	30.8	205860	121.19	26	2	Met-loss+Acetyl [N-Term]	5.94996e+07	4.04256e+07	6.69929e+07	3.1454e+07	8.56946e+07	9.20222e+07	1.43742e+08	3.54541e+07	5.52494e+07	1.11768e+08	2.55858e+07	2.30532e+07	2.25857e+07	4.22296e+07	4.36483e+07	9.57006e+07	4.42999e+07	3.33958e+07	6.29626e+07	8.20389e+07	2.52916e+07	6.98378e+07	2.82099e+07	2.15486e+08	4.03776e+07	7.23909e+07	1.97731e+08
	Other		Voltage-dependent anion-selective channel protein 2 OS=Homo sapiens OX=9606 GN=VDAC2 PE=1 SV=2	VDAC2	P45880	194.065	59	18	408	14	294	31.5	189660		18			6.05222e+08	3.23795e+07	5.53304e+07	2.48586e+07	6.45357e+07	6.53237e+07	1.39428e+08	4.69976e+07	7.80945e+07	3.76979e+08	2.69372e+07	3.44787e+07	4.11304e+07	4.61509e+07	6.50102e+07	7.52077e+07	6.11724e+07	6.79394e+07	4.54808e+07	1.14114e+08	3.88518e+07	3.19887e+07	3.82232e+07	8.01816e+07	4.81149e+07	5.37481e+07	1.61057e+08
	Other		Voltage-dependent anion-selective channel protein 3 OS=Homo sapiens OX=9606 GN=VDAC3 PE=1 SV=1	VDAC3	Q9Y277	134.268	53	17	214	14	283	30.6	80952	17.9	16	1	Met-loss+Acetyl [N-Term]	7.84757e+07	1.51866e+07	2.27666e+07	1.0742e+07	9.46323e+07	3.09027e+07	4.16854e+07	9.40884e+06	2.93038e+07	2.02727e+07	1.49814e+07	3.99716e+07	9.91371e+06	1.75489e+07	2.64327e+07	4.3142e+07	2.41893e+07	2.18251e+07	2.4013e+07	9.78416e+07	3.01095e+07	2.15917e+07	1.60914e+07	8.49702e+07	2.92715e+07	2.69381e+07	4.04513e+07
	Other		Vimentin OS=Homo sapiens OX=9606 GN=VIM PE=1 SV=4	VIM	P08670	180.735	48	26	549	16	466	53.6	309171		26			1.23217e+07	3.36162e+06	3.26366e+06	4.41042e+06	1.56925e+07	2.76133e+07	2.09814e+07	4.72437e+06	1.21943e+07	2.47034e+07	1.72452e+07	3.36522e+07	6.37977e+06	3.27358e+07	7.75954e+06	4.85735e+06	1.03557e+07	7.78849e+06	1.02834e+07	1.21115e+07	8.05718e+06	1.63944e+07	9.37342e+06	4.36025e+07	1.38976e+07	3.37478e+07	1.13347e+07
	Other		Vitamin K epoxide reductase complex subunit 1 OS=Homo sapiens OX=9606 GN=VKORC1 PE=1 SV=1	VKORC1	Q9BQB6	12.257	15	2	9	2	163	18.2	4063		2			251179	1.95696e+06	1.7544e+06	684347	214485		3.97819e+06	2.03244e+06	2.68254e+06	184748	2.04999e+06		1.57415e+06	1.32408e+06	58126.7	1.62759e+06	3.23969e+06	1.64053e+07		1.75191e+06		1.31545e+07	629544	3.91813e+06	2.14283e+06	7.86477e+06	1.81636e+06
	Other		Vacuolar protein sorting-associated protein 35 OS=Homo sapiens OX=9606 GN=VPS35 PE=1 SV=2	VPS35	Q96QK1	33.348	9	6	13	6	796	91.6	6375		6			143194	284611	606471		139186	685627	3.79252e+06		2.10396e+06	1.50513e+06			2.27213e+06	1.31681e+06	794742	619411	610494	641725		1.25052e+06		543863	1.80713e+06	4.13496e+06	885214	552573	1.68521e+06
	Other		WD repeat-containing protein 1 OS=Homo sapiens OX=9606 GN=WDR1 PE=1 SV=4	WDR1	O75083	5.522	3	2	2	2	606	66.2	720		2				3.55312e+06						905413	995687																	400442
	Other		Xaa-Pro aminopeptidase 2 OS=Homo sapiens OX=9606 GN=XPNPEP2 PE=1 SV=3	XPNPEP2	O43895	18.573	8	4	10	4	674	75.6	5145		4			975866	1.42328e+06	1.73244e+06	600495	404876	22294.4	376784	1.47597e+06	598325	659265	1.19479e+06	1.01417e+06	379269	271433	218349	147241	2.98849e+06	1.56293e+06	236973	128681	506935	260414	1.8321e+06	752136	129176	784505	1.82728e+06
	Other		Synaptobrevin homolog YKT6 OS=Homo sapiens OX=9606 GN=YKT6 PE=1 SV=1	YKT6	O15498	5.611	8	2	3	2	198	22.4	1012		2							381516		361198			34266.3						304094			1.06868e+06	822400		437623		488020		733712
	Other		14-3-3 protein theta OS=Homo sapiens OX=9606 GN=YWHAQ PE=1 SV=1	YWHAQ	P27348	17.778	12	3	3	2	245	27.7	1906		3			2.56405e+06	4.44617e+06	3.7952e+06		2.63471e+06	304839	1.40967e+06	6.2431e+06	5.55691e+06	348230	4.22804e+06		9.37765e+06	4.22999e+06	2.70242e+06	940796	7.86863e+06	4.99919e+06		2.91211e+06	1.04471e+06	2.31974e+06	2.23197e+06	2.49515e+06	452764	6.45722e+06	7.08944e+06
	Other		14-3-3 protein zeta/delta OS=Homo sapiens OX=9606 GN=YWHAZ PE=1 SV=1	YWHAZ	P63104	9.822	12	3	4	2	245	27.7	1550		3					597619	379429	341861	220903	944036				977296	836989	500772	331781	953630	319797	1.90561e+06		512914	603632	719845	1.19106e+06	2.30704e+06		636250	243362	559635
	Other		Zymogen granule membrane protein 16 OS=Homo sapiens OX=9606 GN=ZG16 PE=1 SV=2	ZG16	O60844	22.085	16	3	8	3	167	18.1	3560		3						21820.7		114079	1.30396e+06				323928			317222	123911	3.56377e+07	3.07104e+06	429472	327480					128886
	Other		CAAX prenyl protease 1 homolog OS=Homo sapiens OX=9606 GN=ZMPSTE24 PE=1 SV=2	ZMPSTE24	O75844	4.496	3	2	7	2	475	54.8	3309		2					666331		731105	20269.2		207201		304906	461597	1.14885e+06	122097	1.50624e+06	100220		766273	273690	1.2263e+06	915146	637814	555538	943104	763068	456930		226145
	Other		Zyxin OS=Homo sapiens OX=9606 GN=ZYX PE=1 SV=1	ZYX	Q15942	31.129	7	4	22	4	572	61.2	9950		4			92351.4	1.39705e+06	640419		496559	2.63339e+06	3.86477e+06		1.04478e+06	528080	1.40929e+08	340304	251153	1.02171e+06	6.79543e+06	1.0684e+06	1.87575e+06		625858	1.26346e+06	1.28838e+06	1.46802e+08		4.2909e+06	2.89604e+06	662756	1.38968e+06
